## **Implementation of a qPCR assay coupled with genomic surveillance for real-time monitoring of SARS-CoV-2 variants of concern.**

Natalia Rego<sup>1\*</sup>, Alicia Costáble<sup>2,3\*</sup>, Mercedes Paz<sup>2\*</sup>, Cecilia Salazar<sup>4\*</sup>, Paula Perbolianachis<sup>3,5\*</sup>, Lucía Spangenberg<sup>1</sup>, Ignacio Ferrés<sup>4</sup>, Rodrigo Arce<sup>3,5,6</sup>, Alvaro Fajardo<sup>3,5</sup>, Mailen Arleo<sup>6</sup>, Tania Possi<sup>6</sup>, Inés Bellini<sup>6</sup>, Lucia Bilbao<sup>6</sup>, Natalia Reyes<sup>6</sup>, Ma Noel Bentancor<sup>6</sup>, Andrés Lizasoain<sup>7</sup>, María José Benítez<sup>7</sup>, Matías Castells<sup>7</sup>, Matías Victoria<sup>7</sup>, Leticia Maya<sup>7</sup>, Viviana Bortagaray<sup>7</sup>, Ana Moller<sup>7</sup>, Gonzalo Bello<sup>8</sup>, Ighor Arantes<sup>8</sup>, Mariana Brandes<sup>1</sup>, Pablo Smircich<sup>9,10</sup>, Odhille Chappos<sup>11</sup>, Melissa Duquía<sup>11</sup>, Belén González<sup>11</sup>, Luciana Griffiero<sup>11</sup>, Mauricio Méndez<sup>11</sup>, Ma Pía Techera<sup>11</sup>, Juan Zanetti<sup>11</sup>, Bernardina Rivera<sup>12</sup>, Matías Maidana<sup>12</sup>, Martina Alonso<sup>12</sup>, Cecilia Alonso<sup>11</sup>, Julio Medina<sup>13</sup>, Henry Albornoz<sup>14</sup>, Rodney Colina<sup>7</sup>, Veronica Noya<sup>6#</sup>, Gregorio Iraola<sup>2,4#</sup>, Tamara Fernández-Calero<sup>1#</sup>, Gonzalo Moratorio<sup>2,3,5#</sup>, Pilar Moreno<sup>2,3,5#</sup>.

\* These authors contributed equally to this work

#Co-corresponding authors

<sup>1</sup> Unidad de Bioinformática, Institut Pasteur de Montevideo, Uruguay

<sup>2</sup> Centro de Innovación en Vigilancia Epidemiológica, Institut Pasteur de Montevideo, Uruguay.

<sup>3</sup> Laboratorio de Evolución Experimental de Virus, Institut Pasteur de Montevideo, Uruguay.

<sup>4</sup> Laboratorio de Genómica Microbiana, Institut Pasteur Montevideo, Uruguay

<sup>5</sup> Laboratorio de Virología Molecular, Facultad de Ciencias, Universidad de la República, Montevideo, Uruguay.

<sup>6</sup> Laboratorio Biología Molecular Sanatorio Americano, Montevideo, Uruguay

<sup>7</sup> Laboratorio de Virología Molecular. Departamento de Ciencias Biológicas. Centro Universitario Regional del Litoral Norte. Universidad de la República, Salto, Uruguay

<sup>8</sup> Laboratório de AIDS e Imunologia Molecular, Instituto Oswaldo Cruz – Fiocruz, Rio de Janeiro, Brazil.

<sup>9</sup> Departamento de Genómica, Instituto de Investigaciones Biológicas Clemente Estable, Montevideo, Uruguay.

<sup>10</sup> Laboratorio de Interacciones Moleculares, Facultad de Ciencias, Universidad de la República, Montevideo, Uruguay.

<sup>11</sup> Centro Universitario Regional Este (CENUR Este-Sede Rocha), Universidad de la República, Rocha, Uruguay

<sup>12</sup> Laboratorio de Diagnóstico Molecular, Institut Pasteur de Montevideo

<sup>13</sup> Ministerio de Salud Pública, Uruguay; Cátedra de Enfermedades Infecciosas, Fac. de Medicina, Universidad de la República, Montevideo, Uruguay

<sup>14</sup> Ministerio de Salud Pública, Montevideo, Uruguay

**Contact information of corresponding and alternate corresponding authors:** Pilar Moreno [pmoreno@pasteur.edu.uy](mailto:pmoreno@pasteur.edu.uy); Gonzalo Moratorio [gmoratorio@pasteur.edu.uy](mailto:gmoratorio@pasteur.edu.uy)

**Keywords:** SARS-CoV2, VOCs, Genomic surveillance

**Running title:** VOC surveillance with qPCR and genomics

## **Abstract**

We developed a genomic surveillance program for real-time monitoring of SARS-CoV-2 variants of concern in Uruguay. Here, we present the first results, including the proposed qPCR-VOC method, the general workflow and the report of the introduction and community transmission of the VOC P.1 in Uruguay in multiple independent events.

## **Introduction**

Throughout the pandemic, as part of the natural viral evolution, genetic variants of SARS-CoV-2 have emerged. Some of these have shown increased transmissibility, more severe disease with increased hospitalizations, intensive care units admissions and deaths, significant reduction in neutralization by antibodies generated during previous infection or vaccination, reduced effectiveness of treatments or vaccines and/or diagnostic detection failures [1,2]. These are called variants of concern (VOCs). To date, five VOCs have been identified: B.1.1.7, B.1.351, P.1, B.1.427 and B.1.429 [3]. A robust surveillance workflow for early identification of VOCs is key to accelerate pandemic responsiveness.

Surveillance data from Brazil demonstrated a sharp increase in the number of SARS-CoV-2 cases, hospitalisations and deaths after the emergence of the VOC P.1 in the Amazonas state in November 2020 [4, 5]. The VOC P.1 displays a higher transmissibility than previous local SARS-CoV-2 lineages [4, 5] and rapidly spread through the country, becoming the predominant strain in most country regions by February-March, 2021 [6]. This VOC has also spread worldwide and as of 4 May 2021, the lineage P.1 has been detected in at least 41 countries worldwide [7]. This raises the concern that VOC P.1 might follow in other countries the same epidemic trajectory observed in Brazil.

Uruguay, which shares 600 miles of dry border with Brazil and hosts more than 170,000 people living in twin cities with intense economic and social interaction, has experienced an exponential increase of COVID-19 cases since late

February, 2021, placing it at the top of the countries with the higher number of daily confirmed cases and deaths per million people. Despite the Brazilian-Uruguayan border has remained closed to nonresident foreigners since March 2020, there is evidence of high viral flux between both countries [8, 9], implying the risk for imminent introduction of P.1 into Uruguay and the necessity of coming up with an organized strategy to monitorize this and other viral variants circulating in the country.

We developed a comprehensive genomic surveillance program for real-time monitoring VOCs emergence in Uruguay to help sanitary authorities to manage the crisis. We created an inter-institutional working group (liWG) to run this program aiming to put together: i) a diagnostic network, ii) expertise and resources to handle large-scale sequencing, iii) computational scientists to analyze genomic datasets, and iv) an affordable and decentralizable “in house” qPCR test specifically designed to detect worldwide known VOCs (B.1.1.7, B.1.351 and P.1). Here, we present the results of the first two weeks of the liWG, including the proposed qPCR-VOC method, the general workflow and the report of the introduction and community transmission of the VOC P.1 in Uruguay in multiple independent events.

## **Results**

### **Inter-institutional working group (liWG) for real time genomic surveillance of SARS-CoV-2.**

This task force is form by four Institutions (Institut Pasteur de Montevideo, Universidad de la República, Zurgén-Sanatorio Americano and Ministerio de

Salud Pública), including more than 30 people, among them researchers, physicians and health authorities. Four diagnostic laboratories are included in the network, that are able to process all together more than 3,000 nasopharyngeal samples per day. Of those, between 200 – 300 SARS-CoV2 positive samples are received weekly for qPCR-VOC analysis and 50% of them were further processed for SARS-CoV-2 genome sequencing. Those numbers are projected to increase with time if exponential growth of cases is sustained. Figure 1A shows the liWG workflow.

### **Detection of P.1 variant by VOCs qPCR method and sequencing**

In the first two weeks of the liWG work, a total of 251 SARS-CoV-2 positive RNA samples were obtained from hospitalised cases and outpatient cases collected from all over the country (15 out of 19 Uruguayan departments) between 01/11/2021 and 03/26/2021 (Supplementary Table 1) and processed according to Figure 1A. Patients involved in the study presented Cts for initial diagnostic PCR which ranged from 9 to 34.7, both genders were included (95 males, 95 females and 61 unknown) and age ranged from 1 to 85 years old.

Results from qPCR-VOC assay showed that 67/251 samples (27%) were classified as putative P.1/B.1.351 (Supplementary Figure 1). All VOC positives samples, plus 31 additional samples, were sequenced using the ARCTIC Network protocol for the MinION platform (Oxford Nanopore)[10] as described in Supplementary Methods, to validate PCR-VOC classification. For 74 final consensus sequences with high quality that were assigned to SARS-CoV-2

lineages using Pango nomenclature [11], we achieved a 100% agreement between qPCR-VOC and genome sequencing results. As expected, given the proximity to Brazil, samples classified as P.1/B.1.351 by qPCR-VOC, were assigned to lineage P.1 after genome sequencing. qPCR-VOC is a feasible, precise and scalable method to follow known VOCs in real-time.

Given the qPCR-VOC screening and the confirmation of P.1 by genome sequencing, we established the circulation of lineage P.1 in 15 of 19 departments in Uruguay here analyzed (Figure 1D and Supplementary Figure 1 and 2). To estimate the geographic source and the number of independent introductions of P.1 variant into Uruguay, P.1 Uruguayan sequences obtained in this work were combined with other P.1 sequences from Uruguay (n=3) collected in February (Supplementary Table 1), and with 691 P.1 sequences from South America available in EpiCoV/GISAID [12] (Supplementary Table 2). The ML phylogeographic analysis identified at least 12 independent introductions of lineage P.1 in Uruguay from Brazil and at least six local transmission clusters (designated as UY-I to UY-VI) of between three and 24 sequences (Figure 1B). The median  $T_{MRCA}$  of these six Uruguayan P.1 clades was estimated with Bayesian analysis to between mid-February and early March 2021 (Figure 1D, Supplementary Figure 3 and Supplementary Table 3), which coincides with a period of increasing mobility in the country and the beginning of the exponential growth phase (Figure 1C).

## **Conclusion**

The rapid emergence of the SARS-CoV-2 lineage P.1 in the South American region requires the need for increased screening of this highly transmissible virus. Here we developed a comprehensive genomic surveillance program and provide a clear example of how multidisciplinary teams are key mechanisms for helping sanitary authorities to better manage the crisis. Thus, we created an inter-institutional working group with diagnostic laboratories, hospitals (public and private), public and academic institutions across Uruguay that allows real-time VOCs surveillance. Our findings revealed that the VOC P.1 was introduced in Uruguay at multiple times over a period of increasing mobility between mid-February and early March, 2021. The introduction of the highly transmissible VOC P.1 coupled to the increasing human mobility probably contributed to the rapid local spread of this variant and to the COVID-19 epidemic worsening in Uruguay in 2021.

## **Acknowledgements**

Thanks for efforts from different groups that contribute with SARS-CoV-2 genomes to the EpiCoV GISAID initiative (Supplementary GISAID Acknowledgment Table). We thank Marcelo Fiori and María Inés Fariello for sharing the Uruguayan mobility data and Christian Brandt from Institute for Infectious Diseases and Infection Control (Jena University Hospital), for adapting their poreCov Nextflow pipeline to our requirements and to quickly clarify doubts about its implementation.

We also want to thank Dr. Nicolas Nin and Javier Hurtado from Hospital Español.



## Funding

This work was supported by FOCEM-Fondo para la Convergencia Estructural del Mercosur (COF03/11).

## References

1. Abdool Karim SS, de Oliveira T. New SARS-CoV-2 Variants - Clinical, Public Health, and Vaccine Implications [published online ahead of print, 2021 Mar 24]. *N Engl J Med*. 2021;NEJMc2100362. doi:10.1056/NEJMc2100362
2. Funk T, Pharris A, Spiteri G, et al. Characteristics of SARS-CoV-2 variants of concern B.1.1.7, B.1.351 or P.1: data from seven EU/EEA countries, weeks 38/2020 to 10/2021. *Euro Surveill*. 2021;26(16):pii=2100348. doi:10.2807/1560-7917.ES.2021.26.16.2100348
3.  
<https://www.cdc.gov/coronavirus/2019-ncov/cases-updates/variant-surveillance/variant-info.html> [Accessed Apr 2021]
4. Faria NR, Mellan TA, Whittaker C, et al. Genomics and epidemiology of the P.1 SARS-CoV-2 lineage in Manaus, Brazil [published online ahead of print, 2021 Apr 14]. *Science*. 2021;eabh2644. doi:10.1126/science.abh2644
5. Naveca F, Nascimento V, Souza V, et al. COVID-19 epidemic in the Brazilian state of Amazonas was driven by long-term persistence of endemic SARS-CoV-2 lineages and the recent emergence of the new Variant of Concern P.1. *Research Square* [Preprint]. 2021. [Accessed 3 Mar 2021]. doi:10.21203/rs.3.rs-275494/v1

6.

<http://www.genomahcov.fiocruz.br/frequencia-das-principais-linhagens-do-sars-cov-2-por-mes-de-amostragem/> [Accessed 30 Apr 2021]

7.

[https://outbreak.info/situation-reports?pango=P.1&selected=BRA&loc=BRA&loc=USA&loc=USA\\_US-CA](https://outbreak.info/situation-reports?pango=P.1&selected=BRA&loc=BRA&loc=USA&loc=USA_US-CA) [Accessed 30 Apr 2021]

8. Elizondo V, Harkins GW, Mabvakure B, et al. SARS-CoV-2 genomic characterization and clinical manifestation of the COVID-19 outbreak in Uruguay. *Emerg Microbes Infect.* 2021;10(1):51-65. doi:10.1080/22221751.2020.1863747

9. Mir D, Rego N, Resende PC, et al. Recurrent dissemination of SARS-CoV-2 through the Uruguayan-Brazilian border. *Front. Microbiol.-Virology*, 2021. doi:10.3389/fmicb.2021.653986

10. Tyson JR, James P, Stoddart D, et al. Improvements to the ARTIC multiplex PCR method for SARS-CoV-2 genome sequencing using nanopore. Preprint. bioRxiv. 2020;2020.09.04.283077. Published 2020 Sep 4. doi:10.1101/2020.09.04.283077

11. Rambaut A, Holmes EC, O'Toole Á, et al. A dynamic nomenclature proposal for SARS-CoV-2 lineages to assist genomic epidemiology. *Nat Microbiol.* 2020;5(11):1403-1407. doi:10.1038/s41564-020-0770-5

12. Shu Y, McCauley J. GISAID: Global initiative on sharing all influenza data - from vision to reality. *Euro Surveill.* 2017;22(13):30494. doi:10.2807/1560-7917.ES.2017.22.13.30494

**Figure 1**

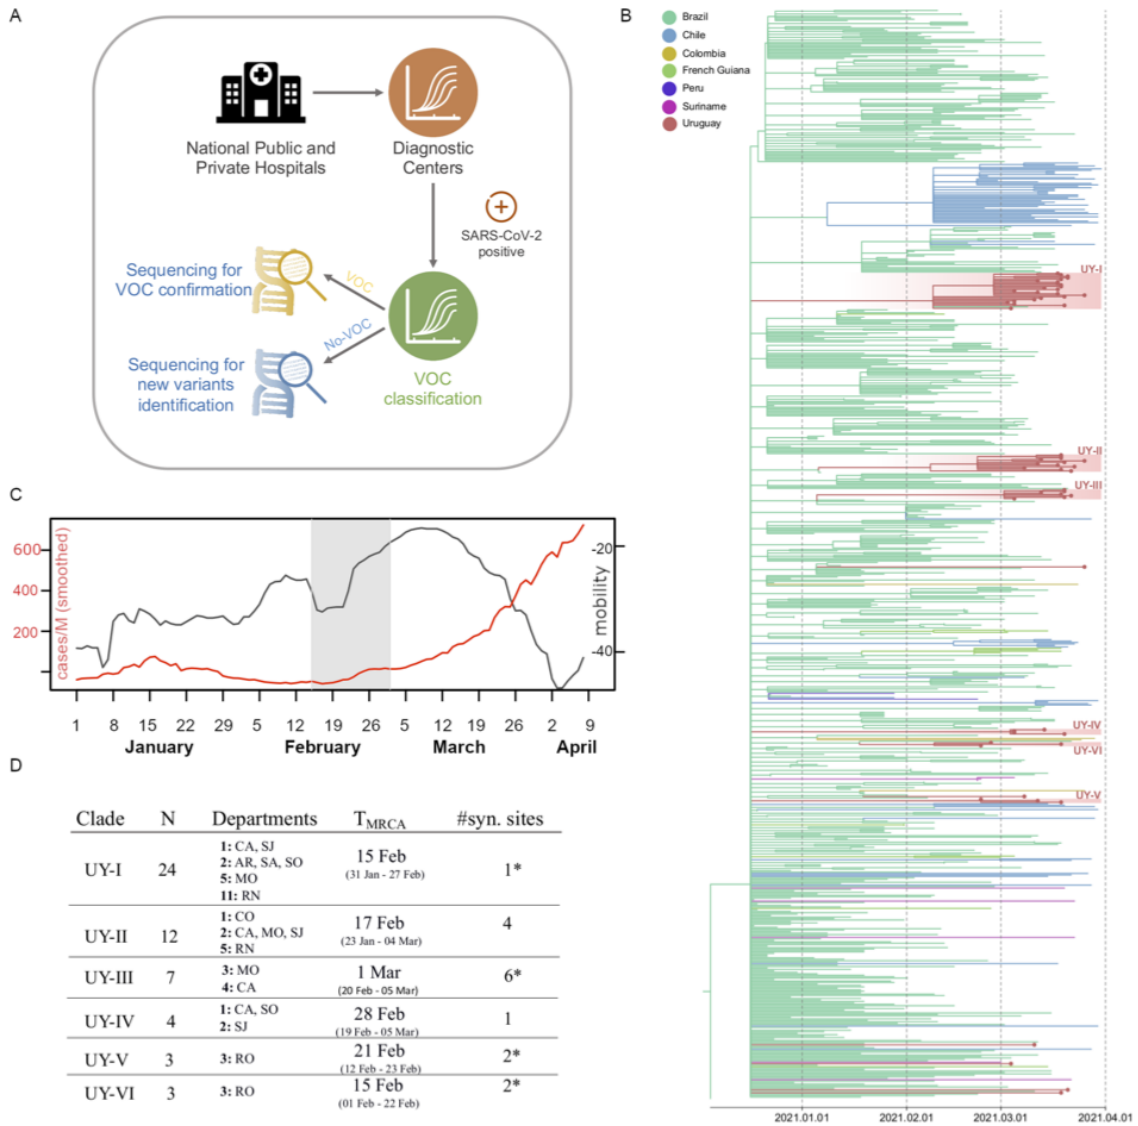

## Figure Legend

Figure 1.

1A. Inter-institutional working group (liWG) Workflow. Diagnostic centers perform standard qPCR for identification of positive samples. Those are further evaluated by a drop-out qPCR assay to determine known VOCs. A subset of samples classified as VOC and NO-VOC by drop-out qPCR are then sequenced to confirm known VOCs and detect new potential variants. 1B. Time-scaled Bayesian phylogeographic MCC tree of 59 Uruguayan and 691 South American P.1 whole genome sequences. The tree was rooted with the EPI\_ISL\_833137 sequence (collection date 2020-12-04). Branches are colored according to the most probable location state of their descendant nodes as indicated at the legend. As can be seen from the read blocks distribution along the P.1 tree, at least 12 independent introductions can be estimated, with locally transmitted clusters of size three to 24. Brazil, in aquamarine, has been the source of dissemination of P.1 sequences to Uruguay and other South American countries. 1.C Mobility index (black) and number of cases per million (red) is shown daily. Mobility index is calculated as in <https://hdl.handle.net/20.500.12008/27166>. The time ranges from January 1st to 9th April. In gray the estimated time period where the P.1 was most likely first introduced to the country (~15<sup>th</sup> February). 1.D Summary table with the six (non-singleton) clades found in the time-scaled Bayesian tree. Clades are numbered from UY-I to UY-VI. N represents the number of sequences in each clade. The Department column holds information of the collection sites and number of sequences per site. CA:Canelones, SJ:San Jose, MO:Montevideo, RO:Rocha, SA:Salto, CO:Colonia, RN: Rio Negro, AR:Artigas, SO: Soriano.

$T_{\text{MRCA}}$  (most recent common ancestor) is the estimated time of the clade (in brackets the boundaries of the 95% confidence interval). The syn. sites columns corresponds to the number of synapomorphic sites defining each clade. Additionally, the asterisk marks whether the amino acid replacement is considered radical. See Supplementary Table 3 for more details on the clades and synapomorphies.

## Supplementary Material File

1. Supplementary Methods
2. Supplementary References
3. Supplementary Tables
4. Supplementary Figures
5. Supplementary GISAID Acknowledgment Table

### 1. Supplementary Methods

**Ethics statement.** Residual de-identified RNA samples from positive patients were remitted to the Institut Pasteur Montevideo (IPmon). IPmon was validated by the Ministry of Health of Uruguay as an approved center providing diagnostic testing for COVID-19. All samples were de-identified before receipt by the study investigators.

#### **Development of a “drop out” qPCR SARS-CoV-2 approach to detect VOCs.**

Primers and “drop out” probes designed to target the deletion sites in both Spike (S) and ORF1ab viral genes were used for this assay. Primers and probes targeting ORF1ab deletion ( $\Delta$ 3675-3677SGF) were designed using the nucleotide sequence from Wuhan strain (GenBank acc. NC\_045512) and are shown in Supplementary Table 4. Oligonucleotide complementarity and  $T_m$  were assessed with OligoAnalyzer (IDT)[1]. Primers and probes targeting S deletion ( $\Delta$ 69/70 HV) were taken from [2]. B.1.1.7 has both deletions whereas P.1 and B.1.351 have only deletion in ORF1ab. Hence, we expect no amplification with both probes with B.1.1.7 lineage viruses, only amplification of the S gene with P.1 and B.1.351 lineages and amplification of both genomic regions with other lineages. These primer/probe sets were analyzed with BLAST to rule out similarities with other sequences other than SARS-CoV-2. The detection strategy is based on the standard hydrolysis probe system (TaqMan®

Technology). The S gene specific probes are labeled with the HEX fluorophore, while the Orf1a probe is custom labeled with CY5 fluorophore. The primers and probes were synthesized by Integrated DNA Technologies (IDT) and purified by high-pressure liquid chromatography. The OneStep Reaction mix was prepared using 5 µl of RNA samples, 5 µl of 4 x TaqMan Fast Virus 1-Step Master Mix (Thermo Cat. No. 4444436), with 0.3 µM of each S primers, 0.1 µM of S probe, 0.3 µM of each Orf1a primer, 0.1 µM of Orf1a probe and molecular biology grade water to a final volume of 20 µl. The RT-qPCR assays were performed using QuantStudio™ 7 (Applied Biosystem).

### **Genome Sequencing**

Sequencing libraries were prepared according to the Eco PCR tiling of COVID-19 virus protocol (Oxford Nanopore Technologies, United Kingdom), based on the method described by Quick J. [3, 4] with some modifications. RNA samples previously screened by a qPCR assay, were reverse transcribed using SuperScript™ II Reverse Transcriptase (Thermo Fisher Scientific Inc., MA, USA) or the LunaScript® RT SuperMix Kit (New England Biolabs, Ipswich, MA, USA). A negative control was included at this point and carried throughout the protocol. V3 Artic Network primers (IDT) were used for SARS-CoV-2 genome amplification using the Q5® High-Fidelity DNA Polymerase (NEB) in two multiplex PCR reactions. At this point a positive control from a previously sequenced sample was added and carried throughout the protocol. Both reactions were pooled and diluted for the end prep reaction using the NEBNext Ultra II End repair / dA-tailing Module (NEB). Blunt/TA Ligase master mix (NEB) was used to ligate unique barcodes (Native Barcoding expansion kit, EXP-NBD196, Oxford Nanopore Technologies, United Kingdom) to the end prepped samples. Barcoded samples were pooled, cleaned up

using 0.4X volume of AMPure XP beads (Beckman coulter, USA) and quantified using the Qubit HS dsDNA kit (Thermo Fisher Scientific Inc., MA, USA). AMII sequencing adapters were ligated using the NEBNext Quick Ligation Module (New England Biolabs, Ipswich, MA, USA) and washed with SFB buffer (Oxford Nanopore Technologies, United Kingdom). Final library was eluted on EB buffer (Oxford Nanopore Technologies, United Kingdom) and quantified using the Qubit HS dsDNA kit. Approximately 50 fmol was loaded into a FLO-MIN106D R9.4.1 flow cell and sequenced on the GridION X5 sequencing platform (ONT) until a minimum sequencing depth of 500X was achieved.

Basecalling and demultiplexing was performed with Guppy 4.3.2 [5] using the high accuracy mode. Samples were demultiplexed using both front and rear barcodes using the `--require_both_barcodes` option. Consensus genomes were generated and using the poreCov pipeline [6, 7] implemented in Nextflow [8], which includes the Artic Network workflow [9], Pangolin for PANGO lineage [10] assignment, nextclade for clade assignment [11], Kraken2 and Krona for contamination detection and visualization [12, 13], minimap2 for read mapping [14], medaka for consensus generation, and using singularity as container engine [15]. Amplicons that are not sequenced or whose depth is less than 20x are not included in the consensus sequences and these positions are represented by “N” stretches. Complete sequences with up to 15% of Ns were kept for further analysis. All genomes obtained in this study were uploaded to the EpiCoV database in the GISAID initiative under the accession numbers: EPI\_ISL\_1992241, EPI\_ISL\_1992100, EPI\_ISL\_1991974, and EPI\_ISL\_2031707 to EPI\_ISL\_2031762 and additional metadata for Uruguayan genomes is presented in Supplementary Table 1.



## Phylogenetic and phylogeographic analysis

Uruguayan P.1 genome sequences (n = 59) were manually curated in specific genome positions of interest, such as P.1 synapomorphies, and were analyzed in the context of additional P.1 sequences from South America, downloaded from EpiCoV database in the GISAID initiative [16]. Downloaded sequences (n = 905, see Supplementary GISAID Acknowledgment Table) were complete, high quality, with full collection date information and sampled before March 31, 2021. Alignment was performed with MAFFT v7.471 [17]. After carefully alignment inspection, several sequences were missing the characteristic indels (del11288-11296 and ins28269-28273) of P.1 and were excluded, retaining 691 sequences from Brazil (n = 590), Chile (n = 72), Colombia (n = 4), French Guiana (n = 15), Peru (n = 2) and Suriname (n = 8) (Supplementary Table 2). Maximum likelihood (ML) phylogenetic analysis of P.1 samples was conducted using IQ-TREE version 1.6.12 under the GTR+F+R3 nucleotide substitution model selected by the built-in ModelFinder option [18]. Branch support was assessed by the approximate likelihood-ratio test based on a Shimodaira-Hasegawa-like procedure with 1,000 replicates. The tree was rooted using the sequence EPI\_ISL\_833137 with collection date 2020-12-04 and visualized using iTOL [19]. ML phylogeographic analysis and time-scaled Bayesian analysis were next performed to infer the geographical source of Uruguayan P.1 samples and to estimate the time of the most recent common ancestors ( $T_{MRCA}$ ) of the Uruguayan P.1 clades, respectively. The previously generated ML phylogenetic tree was time-scaled using TreeTime [20] applying a fixed clock rate of  $8 \times 10^{-4}$  substitutions/site/year, based on previous estimates [21, 22], a skyline coalescent model with eight grid points and keeping polytomies. The time-scaled tree was then employed for the ancestral character state reconstruction (ACR) of epidemic

locations with PastML [23], using the Marginal Posterior Probabilities Approximation (MPPA) method with an F81-like model. A time-scaled Bayesian phylogenetic tree was constructed using the Bayesian Markov Chain Monte Carlo (MCMC) approach implemented in BEAST 1.10 [24] with BEAGLE library v3 to improve computational time. Bayesian analysis was conducted using: the non-parametric Bayesian skyline (BSKL) model as the coalescent tree prior [25], the GTR+I+G model of nucleotide substitution and a strict molecular clock model with a uniform prior on substitution rate ( $8-10 \times 10^{-4}$  substitutions/site/year). Two MCMC chains were run for 50 million generations and then combined to ensure stationarity and good mixing. Convergence (Effective Sample Size > 200) in parameter estimates was assessed using TRACER v1.7 [26]. The maximum clade credibility (MCC) tree was summarized with TreeAnnotator v1.10 [27] and visualized using FigTree v1.4.4 [28].

## **2. Supplementary References**

1. <https://www.idtdna.com/pages/tools/oligoanalyzer> (last accessed February, 2021)
2. Vogels CBF, Breban MI, et al. PCR assay to enhance global surveillance for SARS-CoV-2 variants of concern. Preprint. medRxiv. 2021.01.28.21250486. Published 2021 Feb 1. doi:10.1101/2021.01.28.21250486
3. <https://www.protocols.io/view/ncov-2019-sequencing-protocol-v3-locost-bh42j8ye> (last accessed April, 2021)
4. Tyson JR, James P, Stoddart D, et al. Improvements to the ARTIC multiplex PCR method for SARS-CoV-2 genome sequencing using nanopore. Preprint. bioRxiv. 2020;2020.09.04.283077. Published 2020 Sep 4. doi:10.1101/2020.09.04.283077
5. <https://nanoporetech.com> (last accessed April, 2021)

6. Brandt C, Krautwurst S, Spott R, et al. poreCov - an easy to use, fast, and robust workflow for SARS-CoV-2 genome reconstruction via nanopore sequencing. *bioRxiv*. 2021;2021.05.07.443089. Published 2021 May 7. doi:10.1101/2021.05.07.443089
7. Hufsky F, Lamkiewicz K, Almeida A, et al. Computational strategies to combat COVID-19: useful tools to accelerate SARS-CoV-2 and coronavirus research. *Brief Bioinform*. 2021;22(2):642-663. doi:10.1093/bib/bbaa232
8. Di Tommaso P, Chatzou M, Floden EW, Barja PP, Palumbo E, Notredame C. Nextflow enables reproducible computational workflows. *Nat Biotechnol*. 2017;35(4):316-319. doi:10.1038/nbt.3820
9. <https://artic.network/ncov-2019/ncov2019-bioinformatics-sop.html> (last accessed April, 2021)
10. Rambaut A, Holmes EC, O'Toole Á, et al. A dynamic nomenclature proposal for SARS-CoV-2 lineages to assist genomic epidemiology. *Nat Microbiol*. 2020;5(11):1403-1407. doi:10.1038/s41564-020-0770-5
11. <https://github.com/nextstrain/nextclade> (last accessed April, 2021)
12. Wood DE, Lu J, Langmead B. Improved metagenomic analysis with Kraken 2. *Genome Biol*. 2019;20(1):257. Published 2019 Nov 28. doi:10.1186/s13059-019-1891-0
13. Ondov BD, Bergman NH, Phillippy AM. Interactive metagenomic visualization in a Web browser. *BMC Bioinformatics*. 2011;12:385. Published 2011 Sep 30. doi:10.1186/1471-2105-12-385
14. Li H. Minimap2: pairwise alignment for nucleotide sequences. *Bioinformatics*. 2018;34(18):3094-3100. doi:10.1093/bioinformatics/bty191

15. Kurtzer GM, Sochat V, Bauer MW. Singularity: Scientific containers for mobility of compute. *PLoS One*. 2017;12(5):e0177459. Published 2017 May 11. doi:10.1371/journal.pone.0177459
16. Shu Y, McCauley J. GISAID: Global initiative on sharing all influenza data - from vision to reality. *Euro Surveill*. 2017;22(13):30494. doi:10.2807/1560-7917.ES.2017.22.13.30494
17. Katoh K, Standley DM. MAFFT multiple sequence alignment software version 7: improvements in performance and usability. *Mol Biol Evol*. 2013;30(4):772-780. doi:10.1093/molbev/mst010
18. Nguyen LT, Schmidt HA, von Haeseler A, Minh BQ. IQ-TREE: a fast and effective stochastic algorithm for estimating maximum-likelihood phylogenies. *Mol Biol Evol*. 2015;32(1):268-274. doi:10.1093/molbev/msu300
19. Letunic I, Bork P. Interactive Tree Of Life (iTOL) v4: recent updates and new developments. *Nucleic Acids Res*. 2019;47(W1):W256-W259. doi:10.1093/nar/gkz239
20. Sagulenko P, Puller V, Neher RA. TreeTime: Maximum-likelihood phylodynamic analysis. *Virus Evol*. 2018;4(1):vex042. Published 2018 Jan 8. doi:10.1093/ve/vex042
21. Duchene S, Featherstone L, Haritopoulou-Sinanidou M, Rambaut A, Lemey P, Baele G. Temporal signal and the phylodynamic threshold of SARS-CoV-2. *Virus Evol*. 2020;6(2):veaa061. Published 2020 Aug 19. doi:10.1093/ve/veaa061
22. <https://virological.org/t/time-dependence-of-sars-cov-2-substitution-rates/542>  
(last accessed April, 2021)

23. Ishikawa SA, Zhukova A, Iwasaki W, Gascuel O. A Fast Likelihood Method to Reconstruct and Visualize Ancestral Scenarios. *Mol Biol Evol.* 2019;36(9):2069-2085. doi:10.1093/molbev/msz131
24. Suchard MA, Lemey P, Baele G, Ayres DL, Drummond AJ, Rambaut A. Bayesian phylogenetic and phylodynamic data integration using BEAST 1.10. *Virus Evol.* 2018;4(1):vey016. Published 2018 Jun 8. doi:10.1093/ve/vey016
25. Drummond AJ, Rambaut A, Shapiro B, Pybus OG. Bayesian coalescent inference of past population dynamics from molecular sequences. *Mol Biol Evol.* 2005;22(5):1185-1192. doi:10.1093/molbev/msi103
26. Rambaut A, Drummond AJ, Xie D, Baele G, Suchard MA. Posterior Summarization in Bayesian Phylogenetics Using Tracer 1.7. *Syst Biol.* 2018;67(5):901-904. doi:10.1093/sysbio/syy032
27. Bouckaert R, Vaughan TG, Barido-Sottani J, et al. BEAST 2.5: An advanced software platform for Bayesian evolutionary analysis. *PLoS Comput Biol.* 2019;15(4):e1006650. Published 2019 Apr 8. doi:10.1371/journal.pcbi.1006650
28. <http://tree.bio.ed.ac.uk/software/figtree> (last accessed, April 2021)

### 3. Supplementary Tables

**Supplementary Table 1.** Information on the 251 analyzed samples. ID column, Ct, Department (collection site in Uruguay), and the result of the VOC-qPCR. Possible outputs in this case are either no-VOC or P.1/B.1.351. The asterisk marks those samples with successful sequencing. The ID identifiers do not reveal the identity of the study subjects.

| ID          | Ct   | Department     | Variants by PCR |
|-------------|------|----------------|-----------------|
| CUY1-000001 | 20.1 | Treinta y Tres | No-VOC          |
| CUY1-000002 | 23.8 | Treinta y Tres | No-VOC          |
| CUY1-000004 | 28.7 | Artigas        | No-VOC          |
| CUY1-000006 | 18.0 | Artigas        | No-VOC          |
| CUY1-000007 | 21.5 | San José       | No-VOC          |
| CUY1-000008 | 22.7 | San José       | No-VOC          |
| CUY1-000011 | 22.8 | Artigas        | P.1/B.1.351*    |
| CUY1-000012 | 23.0 | Artigas        | No-VOC          |
| CUY1-000015 | 23.5 | Artigas        | No-VOC          |
| CUY1-000017 | 29.7 | Montevideo     | No-VOC          |
| CUY1-000020 | 34.7 | Montevideo     | P.1/B.1.351*    |
| CUY1-000021 | 22.9 | Colonia        | No-VOC          |
| CUY1-000022 | 19.6 | Maldonado      | No-VOC          |
| CUY1-000023 | 18.3 | Maldonado      | No-VOC          |
| CUY1-000024 | 26.9 | Montevideo     | No-VOC          |
| CUY1-000025 | 15.4 | Montevideo     | P.1/B.1.351*    |
| CUY1-000028 | 31.5 | Salto          | No-VOC          |
| CUY1-000029 | 18.7 | Salto          | No-VOC          |
| CUY1-000030 | 28.7 | Colonia        | NC              |
| CUY1-000031 | 21.3 | Artigas        | P.1/B.1.351*    |

|             |      |            |              |
|-------------|------|------------|--------------|
| CUY1-000032 | 22.9 | San José   | No-VOC       |
| CUY1-000034 | 29.5 | Canelones  | No-VOC       |
| CUY1-000035 | 27.9 | Canelones  | No-VOC       |
| CUY1-000036 | 29.1 | Salto      | No-VOC       |
| CUY1-000037 | 29.9 | Flores     | No-VOC       |
| CUY1-000038 | 25.4 | Salto      | No-VOC       |
| CUY1-000039 | 24.4 | Flores     | No-VOC       |
| CUY1-000040 | 27.9 | Tacuarembó | No-VOC       |
| CUY1-000041 | 30.1 | Flores     | No-VOC       |
| CUY1-000042 | 19.0 | Canelones  | No-VOC       |
| CUY1-000043 | 29.6 | Canelones  | No-VOC       |
| CUY1-000045 | 20.8 | ND         | P.1/B.1.351* |
| CUY1-000046 | 25.9 | Canelones  | P.1/B.1.351* |
| CUY1-000047 | 25.5 | Canelones  | P.1/B.1.351* |
| CUY1-000048 | 22.4 | Salto      | No-VOC       |
| CUY1-000049 | 20.2 | San José   | P.1/B.1.351* |
| CUY1-000050 | 22.7 | San José   | P.1/B.1.351* |
| CUY1-000051 | 24.9 | Salto      | No-VOC       |
| CUY1-000052 | 25.2 | Salto      | No-VOC       |
| CUY1-000053 | 33.0 | Tacuarembó | No-VOC       |
| CUY1-000054 | 27.5 | Salto      | No-VOC       |
| CUY1-000055 | 20.9 | Salto      | No-VOC       |
| CUY1-000056 | 18.7 | Canelones  | No-VOC       |
| CUY1-000057 | 21.8 | Tacuarembó | No-VOC       |
| CUY1-000060 | 22.8 | Florida    | No-VOC       |
| CUY1-000061 | 16.4 | Rocha      | No-VOC       |
| CUY1-000062 | 18.2 | Rocha      | P.1/B.1.351* |
| CUY1-000063 | 20.0 | Florida    | No-VOC       |
| CUY1-000064 | 21.9 | Río Negro  | No-VOC       |
| CUY1-000065 | 20.2 | Rocha      | No-VOC       |

|             |      |            |              |
|-------------|------|------------|--------------|
| CUY1-000066 | 22.4 | Rocha      | No-VOC       |
| CUY1-000067 | 22.1 | Rocha      | No-VOC       |
| CUY1-000068 | 31.8 | Flores     | No-VOC       |
| CUY1-000069 | 25.5 | Flores     | No-VOC       |
| CUY1-000070 | 30.5 | Flores     | P.1/B.1.351  |
| CUY1-000071 | 34.1 | Río Negro  | P.1/B.1.351  |
| CUY1-000072 | 25.9 | Río Negro  | P.1/B.1.351* |
| CUY1-000073 | 22.2 | Flores     | No-VOC       |
| CUY1-000074 | ND   | ND         | No-VOC       |
| CUY1-000075 | 16.4 | San José   | P.1/B.1.351* |
| CUY1-000076 | 19.2 | Canelones  | No-VOC       |
| CUY1-000077 | 20.9 | San José   | No-VOC       |
| CUY1-000078 | 26.8 | Salto      | No-VOC       |
| CUY1-000079 | 26.3 | Salto      | No-VOC       |
| CUY1-000080 | 19.9 | Río Negro  | P.1/B.1.351* |
| CUY1-000081 | 29.5 | Artigas    | P.1/B.1.351  |
| CUY1-000082 | 19.2 | Artigas    | No-VOC       |
| CUY1-000083 | 17.2 | Artigas    | No-VOC       |
| CUY1-000084 | 25.5 | ND         | P.1/B.1.351  |
| CUY1-000085 | 18.1 | Salto      | No-VOC       |
| CUY1-000086 | 19.4 | Colonia    | No-VOC       |
| CUY1-000087 | 26.6 | Florida    | No-VOC       |
| CUY1-000088 | 23.9 | Flores     | No-VOC       |
| CUY1-000089 | 18.6 | San José   | No-VOC       |
| CUY1-000090 | 21.4 | San José   | P.1/B.1.351* |
| CUY1-000091 | 22.2 | Montevideo | No-VOC       |
| CUY1-000092 | 20.1 | Canelones  | No-VOC       |
| CUY1-000093 | 19.0 | Canelones  | P.1/B.1.351* |
| CUY1-000094 | 17.6 | Canelones  | P.1/B.1.351* |
| CUY1-000095 | 23.0 | San José   | P.1/B.1.351* |



|             |      |            |              |
|-------------|------|------------|--------------|
| CUY1-000096 | 19.9 | Montevideo | No-VOC       |
| CUY1-000097 | 29.2 | Montevideo | P.1/B.1.351* |
| CUY1-000098 | 24.5 | ND         | No-VOC       |
| CUY1-000099 | 29.7 | Canelones  | No-VOC       |
| CUY1-000100 | 15.0 | Salto      | No-VOC       |
| CUY1-000101 | 11.0 | Salto      | No-VOC       |
| CUY1-000102 | 9.0  | Salto      | No-VOC       |
| CUY1-000103 | 13.0 | Salto      | No-VOC       |
| CUY1-000104 | 15.0 | Salto      | No-VOC       |
| CUY1-000105 | 11.0 | Salto      | No-VOC       |
| CUY1-000106 | 12.0 | Salto      | No-VOC       |
| CUY1-000107 | 15.0 | Río Negro  | No-VOC       |
| CUY1-000108 | 12.0 | Salto      | No-VOC       |
| CUY1-000109 | 12.0 | Salto      | No-VOC       |
| CUY1-000110 | 13.0 | Río Negro  | P.1/B.1.351* |
| CUY1-000111 | 13.0 | Salto      | No-VOC       |
| CUY1-000112 | 14.0 | Salto      | No-VOC       |
| CUY1-000113 | 12.0 | Salto      | No-VOC       |
| CUY1-000114 | 10.0 | Río Negro  | P.1/B.1.351* |
| CUY1-000115 | 17.0 | Río Negro  | P.1/B.1.351* |
| CUY1-000116 | 14.0 | Salto      | No-VOC       |
| CUY1-000117 | 14.0 | Salto      | No-VOC       |
| CUY1-000118 | 17.0 | Salto      | No-VOC       |
| CUY1-000119 | 10.0 | Salto      | No-VOC       |
| CUY1-000120 | 18.0 | Salto      | No-VOC       |
| CUY1-000121 | 12.0 | Salto      | No-VOC       |
| CUY1-000122 | 13.0 | Salto      | No-VOC       |
| CUY1-000123 | 12.0 | Salto      | No-VOC       |
| CUY1-000124 | 17.0 | Salto      | No-VOC       |
| CUY1-000125 | 13.0 | Salto      | P.1/B.1.351* |

|             |      |            |              |
|-------------|------|------------|--------------|
| CUY1-000126 | 16.0 | Salto      | No-VOC       |
| CUY1-000127 | 18.0 | Salto      | No-VOC       |
| CUY1-000128 | 16.0 | Salto      | No-VOC       |
| CUY1-000129 | 11.0 | Salto      | P.1/B.1.351* |
| CUY1-000130 | 18.0 | Tacuarembó | No-VOC       |
| CUY1-000131 | 15.0 | Tacuarembó | No-VOC       |
| CUY1-000132 | 17.0 | Tacuarembó | No-VOC       |
| CUY1-000133 | 19.0 | Tacuarembó | No-VOC       |
| CUY1-000134 | 17.0 | Tacuarembó | No-VOC       |
| CUY1-000135 | 16.0 | Tacuarembó | No-VOC       |
| CUY1-000136 | 19.0 | Tacuarembó | No-VOC       |
| CUY1-000137 | 15.0 | Tacuarembó | No-VOC       |
| CUY1-000138 | 18.0 | Tacuarembó | No-VOC       |
| CUY1-000139 | 14.0 | Tacuarembó | No-VOC       |
| CUY1-000140 | 19.0 | Tacuarembó | No-VOC       |
| CUY1-000141 | 13.0 | Tacuarembó | No-VOC       |
| CUY1-000142 | 19.0 | Tacuarembó | No-VOC       |
| CUY1-000143 | 18.6 | Tacuarembó | No-VOC       |
| CUY1-000144 | 18.0 | Tacuarembó | No-VOC       |
| CUY1-000145 | 18.2 | Tacuarembó | No-VOC       |
| CUY1-000146 | 14.2 | Tacuarembó | No-VOC       |
| CUY1-000147 | 15.7 | Tacuarembó | No-VOC       |
| CUY1-000148 | 18.0 | Tacuarembó | No-VOC       |
| CUY1-000149 | 18.5 | Tacuarembó | No-VOC       |
| CUY1-000150 | 15.2 | Tacuarembó | No-VOC       |
| CUY1-000151 | 18.0 | Tacuarembó | No-VOC       |
| CUY1-000152 | 16.3 | Tacuarembó | No-VOC       |
| CUY1-000153 | 18.5 | Tacuarembó | No-VOC       |
| CUY1-000154 | 18.5 | Tacuarembó | No-VOC       |
| CUY1-000155 | 19.2 | Tacuarembó | No-VOC       |

|             |      |            |        |
|-------------|------|------------|--------|
| CUY1-000156 | 18.1 | Tacuarembó | No-VOC |
| CUY1-000157 | 19.5 | Tacuarembó | No-VOC |
| CUY1-000158 | 19.8 | Tacuarembó | No-VOC |
| CUY1-000159 | 18.7 | Tacuarembó | No-VOC |
| CUY1-000160 | 19.4 | Tacuarembó | No-VOC |
| CUY1-000161 | 15.2 | Tacuarembó | No-VOC |
| CUY1-000162 | 11.8 | Tacuarembó | No-VOC |
| CUY1-000163 | 17.5 | Tacuarembó | No-VOC |
| CUY1-000164 | 17.3 | Tacuarembó | No-VOC |
| CUY1-000165 | 14.1 | Tacuarembó | No-VOC |
| CUY1-000166 | 17.3 | Tacuarembó | No-VOC |
| CUY1-000167 | 15.3 | Tacuarembó | No-VOC |
| CUY1-000168 | 15.3 | Tacuarembó | No-VOC |
| CUY1-000169 | 14.5 | Tacuarembó | No-VOC |
| CUY1-000170 | 15.5 | Tacuarembó | No-VOC |
| CUY1-000171 | 13.2 | Tacuarembó | No-VOC |
| CUY1-000172 | 13.4 | Tacuarembó | No-VOC |
| CUY1-000173 | 17.9 | Tacuarembó | No-VOC |
| CUY1-000174 | 16.5 | Tacuarembó | No-VOC |
| CUY1-000175 | 17.3 | Tacuarembó | No-VOC |
| CUY2-000176 | 14.0 | Paysandú   | No-VOC |
| CUY2-000177 | 13.0 | Paysandú   | No-VOC |
| CUY2-000178 | 12.0 | Salto      | No-VOC |
| CUY2-000179 | 14.0 | Salto      | No-VOC |
| CUY2-000180 | 17.0 | Paysandú   | No-VOC |
| CUY2-000181 | 16.0 | Paysandú   | No-VOC |
| CUY2-000182 | 14.0 | Salto      | No-VOC |
| CUY2-000183 | 12.0 | Montevideo | No-VOC |
| CUY2-000184 | 16.0 | Salto      | No-VOC |
| CUY2-000185 | 17.0 | Salto      | No-VOC |

|             |      |            |              |
|-------------|------|------------|--------------|
| CUY2-000186 | 9.0  | Salto      | No-VOC       |
| CUY2-000187 | 9.0  | Salto      | No-VOC       |
| CUY2-000188 | 12.0 | Salto      | No-VOC       |
| CUY2-000189 | 14.0 | Salto      | No-VOC       |
| CUY2-000190 | 13.0 | Salto      | No-VOC       |
| CUY2-000191 | 16.0 | Paysandú   | No-VOC       |
| CUY2-000192 | 16.0 | Paysandú   | No-VOC       |
| CUY2-000193 | 14.0 | Paysandú   | No-VOC       |
| CUY2-000194 | 16.0 | Paysandú   | No-VOC       |
| CUY2-000195 | 11.0 | Salto      | No-VOC       |
| CUY2-000196 | 12.0 | Salto      | No-VOC       |
| CUY2-000197 | 11.0 | Salto      | No-VOC       |
| CUY2-000198 | 13.0 | Salto      | P.1/B.1.351* |
| CUY2-000199 | 14.0 | Río Negro  | P.1/B.1.351* |
| CUY2-000200 | 12.0 | Río Negro  | P.1/B.1.351* |
| CUY2-000201 | 22.9 | Montevideo | No-VOC       |
| CUY2-000202 | 20.0 | Montevideo | No-VOC       |
| CUY2-000203 | 16.8 | Montevideo | P.1/B.1.351* |
| CUY2-000204 | 13.6 | Montevideo | P.1/B.1.351* |
| CUY2-000205 | 24.5 | Montevideo | No-VOC       |
| CUY2-000206 | 13.5 | Montevideo | No-VOC       |
| CUY2-000207 | 28.2 | Montevideo | No-VOC       |
| CUY2-000208 | 22.7 | Tacuarembó | No-VOC       |
| CUY2-000209 | 21.8 | Tacuarembó | No-VOC       |
| CUY2-000210 | 31.5 | Artigas    | No-VOC       |
| CUY2-000211 | 22.3 | Río Negro  | P.1/B.1.351* |
| CUY2-000212 | 21.9 | Río Negro  | P.1/B.1.351* |
| CUY2-000213 | 20.3 | Río Negro  | P.1/B.1.351* |
| CUY2-000214 | 21.9 | Río Negro  | P.1/B.1.351* |
| CUY2-000215 | 23.6 | Artigas    | P.1/B.1.351* |

|             |      |           |              |
|-------------|------|-----------|--------------|
| CUY2-000216 | 28.8 | Soriano   | P.1/B.1.351  |
| CUY2-000217 | 21.0 | San José  | No-VOC       |
| CUY2-000218 | 24.2 | Soriano   | No-VOC       |
| CUY2-000219 | 22.7 | Soriano   | No-VOC       |
| CUY2-000220 | ND   | ND        | No-VOC       |
| CUY2-000221 | 24.4 | Rocha     | No-VOC       |
| CUY2-000222 | 22.8 | San José  | P.1/B.1.351* |
| CUY2-000223 | 25.9 | San José  | No-VOC       |
| CUY2-000224 | 23.2 | Maldonado | No-VOC       |
| CUY2-000225 | 23.4 | Canelones | P.1/B.1.351  |
| CUY2-000226 | 22.0 | Canelones | No-VOC       |
| CUY2-000227 | 23.0 | Rocha     | No-VOC       |
| CUY2-000228 | 19.7 | Rocha     | P.1/B.1.351* |
| CUY2-000229 | 20.0 | Rocha     | No-VOC       |
| CUY2-000231 | 18.1 | Canelones | P.1/B.1.351* |
| CUY2-000232 | 24.4 | Soriano   | No-VOC       |
| CUY2-000233 | 21.3 | Rocha     | P.1/B.1.351* |
| CUY2-000234 | 20.5 | Canelones | No-VOC       |
| CUY2-000235 | 19.9 | Río Negro | P.1/B.1.351* |
| CUY2-000236 | 19.2 | Río Negro | P.1/B.1.351* |
| CUY2-000237 | 19.6 | Río Negro | P.1/B.1.351* |
| CUY2-000238 | 23.6 | Río Negro | P.1/B.1.351* |
| CUY2-000239 | 26.2 | Río Negro | P.1/B.1.351* |
| CUY2-000240 | 12.3 | Río Negro | P.1/B.1.351* |
| CUY2-000241 | 22.8 | Canelones | No-VOC       |
| CUY2-000242 | 19.5 | Canelones | No-VOC       |
| CUY2-000243 | 24.7 | Canelones | No-VOC       |
| CUY2-000244 | 25.9 | Canelones | P.1/B.1.351* |
| CUY2-000245 | 18.0 | Canelones | P.1/B.1.351* |
| CUY2-000246 | 30.3 | Canelones | P.1/B.1.351  |

|             |      |            |              |
|-------------|------|------------|--------------|
| CUY2-000247 | 21.5 | San José   | No-VOC       |
| CUY2-000249 | 23.5 | Canelones  | No-VOC       |
| CUY2-000250 | 21.6 | Artigas    | P.1/B.1.351* |
| CUY2-000251 | 31.2 | Montevideo | No-VOC       |
| CUY2-000252 | 17.2 | Montevideo | P.1/B.1.351* |
| CUY2-000253 | 23.3 | Montevideo | No-VOC       |
| CUY2-000254 | 20.6 | Montevideo | P.1/B.1.351* |
| CUY2-000255 | 24.6 | Montevideo | No-VOC       |
| CUY2-000256 | 19.5 | Montevideo | P.1/B.1.351* |
| CUY2-000257 | 23.2 | Canelones  | P.1/B.1.351* |
| CUY2-000258 | 17.7 | Montevideo | P.1/B.1.351* |
| CUY2-000259 | 26.8 | Soriano    | P.1/B.1.351* |
| CUY2-000260 | 25.3 | Soriano    | P.1/B.1.351* |
| CUY2-000261 | 26.7 | Colonia    | P.1/B.1.351* |
| CUY2-000262 | 22.7 | Montevideo | P.1/B.1.351  |
| CUY2-000263 | 18.3 | Montevideo | P.1/B.1.351* |
| CUY2-000264 | 23.6 | Montevideo | P.1/B.1.351  |
| CUY2-000265 | 20.7 | Montevideo | P.1/B.1.351* |
| CUY2-000266 | 18.3 | Montevideo | No-VOC       |
| CUY2-000267 | 18.3 | Tacuarembó | P.1/B.1.351  |
| CUY2-000268 | 20.1 | Tacuarembó | P.1/B.1.351* |
| M525_UYRO   | 19.0 | Rocha      | P.1/B.1.351  |
| M530_UYRO   | 14.6 | Rocha      | ND           |
| M531_UYRO   | 12.3 | Rocha      | ND           |
| ND: No Data |      |            |              |

**Supplementary Table 2.** EpiCoV database identifiers (GISAID initiative) for SARS-CoV-2 downloaded sequences.

| ID              | collection date | upload date | location                                              |
|-----------------|-----------------|-------------|-------------------------------------------------------|
| EPI_ISL_1001384 | 2021-01-31      | 2021-02-15  | South America / French Guiana / Cayenne               |
| EPI_ISL_1001385 | 2021-01-31      | 2021-02-15  | South America / French Guiana / Cayenne               |
| EPI_ISL_1034304 | 2021-01-19      | 2021-02-19  | South America / Brazil / Amazonas / Manaus            |
| EPI_ISL_1034306 | 2021-01-29      | 2021-02-19  | South America / Brazil / Amazonas / Manaus            |
| EPI_ISL_1039691 | 2021-01-19      | 2021-02-20  | South America / Brazil / Goias / Aparecida de Goiania |
| EPI_ISL_1039692 | 2021-01-19      | 2021-02-20  | South America / Brazil / Goias / Aparecida de Goiania |
| EPI_ISL_1039693 | 2021-01-19      | 2021-02-20  | South America / Brazil / Goias / Goiania              |
| EPI_ISL_1039694 | 2021-01-19      | 2021-02-20  | South America / Brazil / Goias / Goiania              |
| EPI_ISL_1039695 | 2021-01-19      | 2021-02-20  | South America / Brazil / Goias / Goiania              |
| EPI_ISL_1041509 | 2021-01-20      | 2021-02-22  | South America / Brazil / Goias / Goiania              |
| EPI_ISL_1068110 | 2020-12-28      | 2021-02-25  | South America / Brazil / Amazonas / Manaus            |
| EPI_ISL_1068111 | 2020-12-28      | 2021-02-25  | South America / Brazil / Amazonas / Manaus            |
| EPI_ISL_1068112 | 2020-12-29      | 2021-02-25  | South America / Brazil / Amazonas / Manaus            |
| EPI_ISL_1068114 | 2020-12-23      | 2021-02-25  | South America / Brazil / Amazonas / Manaus            |
| EPI_ISL_1068149 | 2020-12-18      | 2021-02-25  | South America / Brazil / Amazonas / Manaus            |
| EPI_ISL_1068150 | 2020-12-18      | 2021-02-25  | South America / Brazil / Amazonas / Manaus            |
| EPI_ISL_1068151 | 2020-12-21      | 2021-02-25  | South America / Brazil / Amazonas / Manaus            |
| EPI_ISL_1068154 | 2020-12-23      | 2021-02-25  | South America / Brazil / Amazonas / Manaus            |
| EPI_ISL_1068156 | 2020-12-27      | 2021-02-25  | South America / Brazil / Amazonas / Manaus            |
| EPI_ISL_1068157 | 2020-12-28      | 2021-02-25  | South America / Brazil / Amazonas / Manaus            |
| EPI_ISL_1068158 | 2020-12-28      | 2021-02-25  | South America / Brazil / Amazonas / Manaus            |
| EPI_ISL_1068159 | 2020-12-28      | 2021-02-25  | South America / Brazil / Amazonas / Manaus            |
| EPI_ISL_1068160 | 2020-12-29      | 2021-02-25  | South America / Brazil / Amazonas / Manaus            |
| EPI_ISL_1068169 | 2020-12-28      | 2021-02-25  | South America / Brazil / Amazonas / Rio Preto da Eva  |
| EPI_ISL_1068198 | 2020-12-24      | 2021-02-25  | South America / Brazil / Amazonas / Manaus            |
| EPI_ISL_1068221 | 2020-12-21      | 2021-02-25  | South America / Brazil / Amazonas / Manaus            |
| EPI_ISL_1068222 | 2020-12-21      | 2021-02-25  | South America / Brazil / Amazonas / Manaus            |
| EPI_ISL_1068225 | 2020-12-23      | 2021-02-25  | South America / Brazil / Amazonas / Manaus            |

|                 |            |            |                                                              |
|-----------------|------------|------------|--------------------------------------------------------------|
| EPI_ISL_1068226 | 2020-12-23 | 2021-02-25 | South America / Brazil / Amazonas / Manaus                   |
| EPI_ISL_1068243 | 2020-12-23 | 2021-02-25 | South America / Brazil / Amazonas / Manaus                   |
| EPI_ISL_1068248 | 2020-12-28 | 2021-02-25 | South America / Brazil / Amazonas / Careiro                  |
| EPI_ISL_1068249 | 2020-12-22 | 2021-02-25 | South America / Brazil / Amazonas / Manaus                   |
| EPI_ISL_1068258 | 2021-01-13 | 2021-02-25 | South America / Brazil / Amazonas / Manaus                   |
| EPI_ISL_1068260 | 2021-01-04 | 2021-02-25 | South America / Brazil / Amazonas / Manaus                   |
| EPI_ISL_1068261 | 2021-01-05 | 2021-02-25 | South America / Brazil / Amazonas / Manaus                   |
| EPI_ISL_1068262 | 2021-01-05 | 2021-02-25 | South America / Brazil / Amazonas / Manaus                   |
| EPI_ISL_1068263 | 2021-01-06 | 2021-02-25 | South America / Brazil / Amazonas / Manaus                   |
| EPI_ISL_1068264 | 2021-01-06 | 2021-02-25 | South America / Brazil / Amazonas / Manaus                   |
| EPI_ISL_1068266 | 2021-01-07 | 2021-02-25 | South America / Brazil / Amazonas / Manaus                   |
| EPI_ISL_1068268 | 2021-01-08 | 2021-02-25 | South America / Brazil / Amazonas / Manaus                   |
| EPI_ISL_1068269 | 2021-01-08 | 2021-02-25 | South America / Brazil / Amazonas / Manaus                   |
| EPI_ISL_1068270 | 2021-01-11 | 2021-02-25 | South America / Brazil / Amazonas / Manaus                   |
| EPI_ISL_1068271 | 2021-01-11 | 2021-02-25 | South America / Brazil / Amazonas / Manaus                   |
| EPI_ISL_1068272 | 2021-01-12 | 2021-02-25 | South America / Brazil / Amazonas / Manaus                   |
| EPI_ISL_1068273 | 2021-01-12 | 2021-02-25 | South America / Brazil / Amazonas / Manaus                   |
| EPI_ISL_1068274 | 2021-01-08 | 2021-02-25 | South America / Brazil / Amazonas / Manaus                   |
| EPI_ISL_1068275 | 2021-01-08 | 2021-02-25 | South America / Brazil / Amazonas / Manaus                   |
| EPI_ISL_1068276 | 2021-01-13 | 2021-02-25 | South America / Brazil / Amazonas / Manaus                   |
| EPI_ISL_1068278 | 2021-01-13 | 2021-02-25 | South America / Brazil / Amazonas / Manaus                   |
| EPI_ISL_1068279 | 2021-01-07 | 2021-02-25 | South America / Brazil / Amazonas / Manaus                   |
| EPI_ISL_1068280 | 2021-01-06 | 2021-02-25 | South America / Brazil / Amazonas / Manaus                   |
| EPI_ISL_1068281 | 2021-01-06 | 2021-02-25 | South America / Brazil / Amazonas / Manaus                   |
| EPI_ISL_1068282 | 2021-01-11 | 2021-02-25 | South America / Brazil / Amazonas / Manaus                   |
| EPI_ISL_1068283 | 2021-01-12 | 2021-02-25 | South America / Brazil / Amazonas / Manaus                   |
| EPI_ISL_1068284 | 2021-01-13 | 2021-02-25 | South America / Brazil / Amazonas / Manaus                   |
| EPI_ISL_1068285 | 2021-01-04 | 2021-02-25 | South America / Brazil / Amazonas / Anori                    |
| EPI_ISL_1068286 | 2021-01-04 | 2021-02-25 | South America / Brazil / Amazonas / São Gabriel da Cachoeira |
| EPI_ISL_1068287 | 2021-01-05 | 2021-02-25 | South America / Brazil / Amazonas / Iranduba                 |
| EPI_ISL_1068288 | 2021-01-05 | 2021-02-25 | South America / Brazil / Amazonas / Rio Preto da Eva         |
| EPI_ISL_1068289 | 2021-01-05 | 2021-02-25 | South America / Brazil / Amazonas / Presidente Figueiredo    |



|                 |            |            |                                                       |
|-----------------|------------|------------|-------------------------------------------------------|
| EPI_ISL_1068290 | 2021-01-05 | 2021-02-25 | South America / Brazil / Amazonas / Tabatinga         |
| EPI_ISL_1068291 | 2021-01-07 | 2021-02-25 | South America / Brazil / Amazonas / Careiro           |
| EPI_ISL_1068292 | 2021-01-06 | 2021-02-25 | South America / Brazil / Amazonas / Manacapuru        |
| EPI_ISL_1078992 | 2021-01-15 | 2021-02-25 | South America / Brazil / Sao Paulo / Bauru            |
| EPI_ISL_1079002 | 2021-02-05 | 2021-02-25 | South America / Brazil / Sao Paulo / Bauru            |
| EPI_ISL_1079008 | 2021-02-11 | 2021-02-25 | South America / Brazil / Sao Paulo / Lencois Paulista |
| EPI_ISL_1079162 | 2021-02-08 | 2021-02-25 | South America / Brazil / Sao Paulo / Bauru            |
| EPI_ISL_1086034 | 2021-02-11 | 2021-02-26 | South America / Brazil / Sao Paulo / Araraquara       |
| EPI_ISL_1086035 | 2021-02-10 | 2021-02-26 | South America / Brazil / Sao Paulo / Lencois Paulista |
| EPI_ISL_1086036 | 2021-02-10 | 2021-02-26 | South America / Brazil / Sao Paulo / Lencois Paulista |
| EPI_ISL_1086037 | 2021-02-09 | 2021-02-26 | South America / Brazil / Sao Paulo / Araraquara       |
| EPI_ISL_1086038 | 2021-02-09 | 2021-02-26 | South America / Brazil / Sao Paulo / Araraquara       |
| EPI_ISL_1086039 | 2021-02-09 | 2021-02-26 | South America / Brazil / Sao Paulo / Araraquara       |
| EPI_ISL_1086040 | 2021-02-09 | 2021-02-26 | South America / Brazil / Sao Paulo / Araraquara       |
| EPI_ISL_1086041 | 2021-02-09 | 2021-02-26 | South America / Brazil / Sao Paulo / Araraquara       |
| EPI_ISL_1086042 | 2021-02-09 | 2021-02-26 | South America / Brazil / Sao Paulo / Araraquara       |
| EPI_ISL_1086043 | 2021-02-09 | 2021-02-26 | South America / Brazil / Sao Paulo / Araraquara       |
| EPI_ISL_1086044 | 2021-02-08 | 2021-02-26 | South America / Brazil / Sao Paulo / Lencois Paulista |
| EPI_ISL_1086045 | 2021-02-05 | 2021-02-26 | South America / Brazil / Sao Paulo / Lencois Paulista |
| EPI_ISL_1086046 | 2021-02-04 | 2021-02-26 | South America / Brazil / Sao Paulo / Lencois Paulista |
| EPI_ISL_1086047 | 2021-01-30 | 2021-02-26 | South America / Brazil / Sao Paulo / Jau              |
| EPI_ISL_1086048 | 2021-01-14 | 2021-02-26 | South America / Brazil / Sao Paulo / Jau              |
| EPI_ISL_1086049 | 2021-01-11 | 2021-02-26 | South America / Brazil / Sao Paulo / Jau              |
| EPI_ISL_1096120 | 2021-01-15 | 2021-02-28 | South America / Brazil / Sao Paulo / Jau              |
| EPI_ISL_1096121 | 2021-01-25 | 2021-02-28 | South America / Brazil / Sao Paulo / Araraquara       |
| EPI_ISL_1096122 | 2021-01-26 | 2021-02-28 | South America / Brazil / Sao Paulo / Jau              |
| EPI_ISL_1096124 | 2021-01-28 | 2021-02-28 | South America / Brazil / Sao Paulo / Dois Corregos    |
| EPI_ISL_1096125 | 2021-02-02 | 2021-02-28 | South America / Brazil / Sao Paulo / Jau              |
| EPI_ISL_1096127 | 2021-02-03 | 2021-02-28 | South America / Brazil / Sao Paulo / Bocaina          |
| EPI_ISL_1096131 | 2021-02-08 | 2021-02-28 | South America / Brazil / Sao Paulo / Lins             |
| EPI_ISL_1096132 | 2021-02-08 | 2021-02-28 | South America / Brazil / Sao Paulo / Lins             |
| EPI_ISL_1096134 | 2021-02-08 | 2021-02-28 | South America / Brazil / Sao Paulo / Lins             |
| EPI_ISL_1096135 | 2021-02-09 | 2021-02-28 | South America / Brazil / Sao Paulo / Araraquara       |
| EPI_ISL_1096136 | 2021-02-10 | 2021-02-28 | South America / Brazil / Sao Paulo / Jau              |
| EPI_ISL_1096262 | 2021-02-12 | 2021-02-28 | South America / French Guiana / Cayenne               |
| EPI_ISL_1121307 | 2021-02-13 | 2021-03-03 | South America / Brazil / Sao Paulo / Cajamar          |

|                 |            |            |                                                           |
|-----------------|------------|------------|-----------------------------------------------------------|
| EPI_ISL_1121308 | 2021-02-11 | 2021-03-03 | South America / Brazil / Sao Paulo / Sao Paulo            |
| EPI_ISL_1121309 | 2021-02-10 | 2021-03-03 | South America / Brazil / Sao Paulo / Osasco               |
| EPI_ISL_1121310 | 2021-02-08 | 2021-03-03 | South America / Brazil / Sao Paulo / Lins                 |
| EPI_ISL_1121311 | 2021-02-06 | 2021-03-03 | South America / Brazil / Sao Paulo / Mococa               |
| EPI_ISL_1121312 | 2021-02-05 | 2021-03-03 | South America / Brazil / Sao Paulo / Lins                 |
| EPI_ISL_1121313 | 2021-02-05 | 2021-03-03 | South America / Brazil / Sao Paulo / Lins                 |
| EPI_ISL_1121314 | 2021-02-05 | 2021-03-03 | South America / Brazil / Sao Paulo / Lins                 |
| EPI_ISL_1121315 | 2021-01-16 | 2021-03-03 | South America / Brazil / Sao Paulo / Borebi               |
| EPI_ISL_1121316 | 2021-01-10 | 2021-03-03 | South America / Brazil / Rio Grande do Sul / Porto Alegre |
| EPI_ISL_1123373 | 2021-02-15 | 2021-03-03 | South America / Brazil / Sao Paulo / Biritiba Mirim       |
| EPI_ISL_1139070 | 2021-01-20 | 2021-03-04 | South America / Brazil / Sao Paulo / Araraquara           |
| EPI_ISL_1164970 | 2021-02-05 | 2021-03-05 | South America / Brazil / Ceara                            |
| EPI_ISL_1164971 | 2021-02-05 | 2021-03-05 | South America / Brazil / Ceara                            |
| EPI_ISL_1164972 | 2021-02-02 | 2021-03-05 | South America / Brazil / Para                             |
| EPI_ISL_1164973 | 2021-01-29 | 2021-03-05 | South America / Brazil / Ceara                            |
| EPI_ISL_1164978 | 2021-01-19 | 2021-03-05 | South America / Brazil / Para                             |
| EPI_ISL_1164980 | 2021-01-18 | 2021-03-05 | South America / Brazil / Ceara                            |
| EPI_ISL_1164984 | 2021-01-16 | 2021-03-05 | South America / Brazil / Amapa                            |
| EPI_ISL_1164991 | 2021-01-07 | 2021-03-05 | South America / Brazil / Paraiba                          |
| EPI_ISL_1166615 | 2021-01-18 | 2021-03-05 | South America / Brazil / Amazonas                         |
| EPI_ISL_1171619 | 2021-02-15 | 2021-03-07 | South America / Brazil / Sao Paulo / Presidente Venceslau |
| EPI_ISL_1171648 | 2021-01-05 | 2021-03-07 | South America / Brazil / Sao Paulo / Mococa               |
| EPI_ISL_1171649 | 2021-01-05 | 2021-03-07 | South America / Brazil / Sao Paulo / Mococa               |
| EPI_ISL_1171650 | 2021-01-07 | 2021-03-07 | South America / Brazil / Sao Paulo / Mococa               |
| EPI_ISL_1171653 | 2021-02-05 | 2021-03-07 | South America / Brazil / Sao Paulo / Presidente Prudente  |
| EPI_ISL_1171656 | 2021-02-17 | 2021-03-07 | South America / Brazil / Sao Paulo / Presidente Prudente  |
| EPI_ISL_1171657 | 2021-02-17 | 2021-03-07 | South America / Brazil / Sao Paulo / Presidente Prudente  |
| EPI_ISL_1171658 | 2021-02-15 | 2021-03-07 | South America / Brazil / Sao Paulo / Presidente Prudente  |
| EPI_ISL_1171666 | 2021-02-16 | 2021-03-07 | South America / Brazil / Sao Paulo / Martinopolis         |
| EPI_ISL_1171672 | 2021-01-26 | 2021-03-07 | South America / Brazil / Sao Paulo / Tarabai              |
| EPI_ISL_1171674 | 2021-02-12 | 2021-03-07 | South America / Brazil / Sao Paulo / Dracena              |
| EPI_ISL_1182543 | 2021-02-08 | 2021-03-08 | South America / Brazil / Minas Gerais / Coromandel        |
| EPI_ISL_1182544 | 2021-01-30 | 2021-03-08 | South America / Brazil / Minas Gerais / Belo Horizonte    |
| EPI_ISL_1182545 | 2021-01-30 | 2021-03-08 | South America / Brazil / Minas Gerais / Belo Horizonte    |
| EPI_ISL_1196296 | 2021-02-05 | 2021-03-10 | South America / Brazil / Sao Paulo / Mococa               |
| EPI_ISL_1196299 | 2021-02-04 | 2021-03-10 | South America / Brazil / Sao Paulo / Marilia              |
| EPI_ISL_1201884 | 2021-01-21 | 2021-03-10 | South America / Brazil / Sao Paulo / Guarulhos            |

|                 |            |            |                                                          |
|-----------------|------------|------------|----------------------------------------------------------|
| EPI_ISL_1201893 | 2021-02-18 | 2021-03-10 | South America / Brazil / Sao Paulo / Avare               |
| EPI_ISL_1213168 | 2021-02-14 | 2021-03-11 | South America / Brazil / Bahia / Ilheus                  |
| EPI_ISL_1213170 | 2021-02-08 | 2021-03-11 | South America / Brazil / Bahia / Itabuna                 |
| EPI_ISL_1213171 | 2021-02-03 | 2021-03-11 | South America / Brazil / Rio de Janeiro / Rio de Janeiro |
| EPI_ISL_1213173 | 2021-02-01 | 2021-03-11 | South America / Brazil / Rio Grande do Norte / Natal     |
| EPI_ISL_1213175 | 2021-02-01 | 2021-03-11 | South America / Brazil / Rio Grande do Norte / Natal     |
| EPI_ISL_1213177 | 2021-02-01 | 2021-03-11 | South America / Brazil / Rio Grande do Norte / Natal     |
| EPI_ISL_1213178 | 2021-02-01 | 2021-03-11 | South America / Brazil / Rio Grande do Norte / Natal     |
| EPI_ISL_1213180 | 2021-02-01 | 2021-03-11 | South America / Brazil / Rio Grande do Norte / Natal     |
| EPI_ISL_1213182 | 2021-02-01 | 2021-03-11 | South America / Brazil / Rio Grande do Norte / Natal     |
| EPI_ISL_1213183 | 2021-01-29 | 2021-03-11 | South America / Brazil / Rio Grande do Norte / Natal     |
| EPI_ISL_1213185 | 2021-01-28 | 2021-03-11 | South America / Brazil / Rio Grande do Norte / Natal     |
| EPI_ISL_1213187 | 2021-01-28 | 2021-03-11 | South America / Brazil / Rio Grande do Norte / Natal     |
| EPI_ISL_1213189 | 2021-01-27 | 2021-03-11 | South America / Brazil / Paraiba / Conde                 |
| EPI_ISL_1213190 | 2021-01-26 | 2021-03-11 | South America / Brazil / Amazonas / Manaus               |
| EPI_ISL_1213192 | 2021-01-26 | 2021-03-11 | South America / Brazil / Rio Grande do Norte / Natal     |
| EPI_ISL_1213194 | 2021-01-26 | 2021-03-11 | South America / Brazil / Rio Grande do Norte / Natal     |
| EPI_ISL_1213196 | 2021-01-26 | 2021-03-11 | South America / Brazil / Rio Grande do Norte / Natal     |
| EPI_ISL_1213197 | 2021-01-26 | 2021-03-11 | South America / Brazil / Rio Grande do Norte / Natal     |
| EPI_ISL_1213199 | 2021-01-26 | 2021-03-11 | South America / Brazil / Rio Grande do Norte / Natal     |
| EPI_ISL_1213201 | 2021-01-21 | 2021-03-11 | South America / Brazil / Paraiba / Joao pessoa           |
| EPI_ISL_1213202 | 2021-01-18 | 2021-03-11 | South America / Brazil / Amazonas / Manaus               |
| EPI_ISL_1213204 | 2021-01-18 | 2021-03-11 | South America / Brazil / Amazonas / Manaus               |
| EPI_ISL_1213206 | 2021-01-18 | 2021-03-11 | South America / Brazil / Amazonas / Manaus               |
| EPI_ISL_1213207 | 2021-01-11 | 2021-03-11 | South America / Brazil / Paraiba / Inga                  |
| EPI_ISL_1219021 | 2021-02-24 | 2021-03-11 | South America / Brazil / Sao Paulo / Sao Paulo           |
| EPI_ISL_1219025 | 2021-02-02 | 2021-03-11 | South America / Brazil / Sao Paulo / Guapiara            |
| EPI_ISL_1219029 | 2021-01-23 | 2021-03-11 | South America / Brazil / Sao Paulo / Guarulhos           |
| EPI_ISL_1219030 | 2021-01-23 | 2021-03-11 | South America / Brazil / Sao Paulo / Guarulhos           |
| EPI_ISL_1219033 | 2021-01-22 | 2021-03-11 | South America / Brazil / Sao Paulo / Guarulhos           |
| EPI_ISL_1219036 | 2021-01-21 | 2021-03-11 | South America / Brazil / Sao Paulo / Guarulhos           |
| EPI_ISL_1219133 | 2021-01-26 | 2021-03-11 | South America / Brazil / Parana / Curitiba               |
| EPI_ISL_1219134 | 2021-01-27 | 2021-03-11 | South America / Brazil / Alagoas / Maceio                |
| EPI_ISL_1219135 | 2021-01-27 | 2021-03-11 | South America / Brazil / Alagoas / Maceio                |
| EPI_ISL_1219136 | 2021-02-15 | 2021-03-11 | South America / Brazil / Bahia / Salvador                |
| EPI_ISL_1239012 | 2021-01-26 | 2021-03-13 | South America / Brazil / Amazonas / Manaus               |
| EPI_ISL_1239111 | 2021-02-13 | 2021-03-14 | South America / Brazil / Rio de Janeiro / Petropolis     |

|                 |            |            |                                                               |
|-----------------|------------|------------|---------------------------------------------------------------|
| EPI_ISL_1239119 | 2021-01-26 | 2021-03-14 | South America / Brazil / Espirito Santo / Lorena              |
| EPI_ISL_1239137 | 2021-03-01 | 2021-03-14 | South America / Brazil / Minas Gerais / Monte Alegre de Minas |
| EPI_ISL_1239138 | 2021-03-02 | 2021-03-14 | South America / Brazil / Minas Gerais / Montes Claros         |
| EPI_ISL_1261683 | 2021-01-19 | 2021-03-16 | South America / Brazil / Amazonas                             |
| EPI_ISL_1261684 | 2021-02-15 | 2021-03-16 | South America / Brazil / Ceara                                |
| EPI_ISL_1261685 | 2021-01-20 | 2021-03-16 | South America / Brazil / Amazonas                             |
| EPI_ISL_1261686 | 2021-01-31 | 2021-03-16 | South America / Brazil / Amapa                                |
| EPI_ISL_1261687 | 2021-02-15 | 2021-03-16 | South America / Brazil / Roraima                              |
| EPI_ISL_1261688 | 2021-02-15 | 2021-03-16 | South America / Brazil / Amapa                                |
| EPI_ISL_1261689 | 2021-02-15 | 2021-03-16 | South America / Brazil / Amapa                                |
| EPI_ISL_1261690 | 2021-01-11 | 2021-03-16 | South America / Brazil / Amazonas                             |
| EPI_ISL_1261691 | 2021-02-11 | 2021-03-16 | South America / Brazil / Para                                 |
| EPI_ISL_1261692 | 2021-02-08 | 2021-03-16 | South America / Brazil / Amapa                                |
| EPI_ISL_1261693 | 2021-02-15 | 2021-03-16 | South America / Brazil / Ceara                                |
| EPI_ISL_1261694 | 2021-01-12 | 2021-03-16 | South America / Brazil / Amazonas                             |
| EPI_ISL_1262913 | 2021-02-21 | 2021-03-16 | South America / French Guiana / Cayenne                       |
| EPI_ISL_1289960 | 2021-01-11 | 2021-03-18 | South America / Brazil / Sao Paulo / Ribeirao Preto           |
| EPI_ISL_1293053 | 2021-01-18 | 2021-03-19 | South America / Brazil / Rondonia / Porto Velho               |
| EPI_ISL_1293054 | 2021-01-18 | 2021-03-19 | South America / Brazil / Rondonia / Porto Velho               |
| EPI_ISL_1293055 | 2021-01-18 | 2021-03-19 | South America / Brazil / Rondonia / Porto Velho               |
| EPI_ISL_1293059 | 2021-02-02 | 2021-03-19 | South America / Brazil / Sao Paulo / Guapiara                 |
| EPI_ISL_1293063 | 2021-02-06 | 2021-03-19 | South America / Brazil / Sao Paulo / Salto                    |
| EPI_ISL_1293067 | 2021-02-08 | 2021-03-19 | South America / Brazil / Sao Paulo / Guapiara                 |
| EPI_ISL_1293075 | 2021-02-03 | 2021-03-19 | South America / Brazil / Sao Paulo / Sorocaba                 |
| EPI_ISL_1293077 | 2021-02-03 | 2021-03-19 | South America / Brazil / Sao Paulo / Tiete                    |
| EPI_ISL_1293080 | 2021-02-01 | 2021-03-19 | South America / Brazil / Sao Paulo / Porto Feliz              |
| EPI_ISL_1303502 | 2021-01-19 | 2021-03-21 | South America / Brazil / Rondonia / Porto Velho               |
| EPI_ISL_1303503 | 2021-01-18 | 2021-03-21 | South America / Brazil / Rondonia / Porto Velho               |
| EPI_ISL_1303506 | 2021-01-22 | 2021-03-21 | South America / Brazil / Distrito Federal / Planaltina        |
| EPI_ISL_1303509 | 2021-02-01 | 2021-03-21 | South America / Brazil / Tocantins / Palmas                   |
| EPI_ISL_1303512 | 2021-01-25 | 2021-03-21 | South America / Brazil / Goias / Goiania                      |
| EPI_ISL_1303513 | 2021-01-13 | 2021-03-21 | South America / Brazil / Goias / Turvania                     |
| EPI_ISL_1303514 | 2021-01-19 | 2021-03-21 | South America / Brazil / Goias / Mangueira                    |
| EPI_ISL_1303515 | 2021-01-13 | 2021-03-21 | South America / Brazil / Goias / Britania                     |
| EPI_ISL_1303517 | 2021-02-05 | 2021-03-21 | South America / Brazil / Goias / Jaragua                      |
| EPI_ISL_1303520 | 2021-02-10 | 2021-03-21 | South America / Brazil / Sao Paulo / Meridiano                |
| EPI_ISL_1303522 | 2021-02-12 | 2021-03-21 | South America / Brazil / Sao Paulo / Votuporanga              |

|                 |            |            |                                                                       |
|-----------------|------------|------------|-----------------------------------------------------------------------|
| EPI_ISL_1303525 | 2021-02-16 | 2021-03-21 | South America / Brazil / Sao Paulo / Ipigua                           |
| EPI_ISL_1303529 | 2021-02-12 | 2021-03-21 | South America / Brazil / Sao Paulo / Sao Jose do Rio Preto            |
| EPI_ISL_1303536 | 2021-02-15 | 2021-03-21 | South America / Brazil / Sao Paulo / Sao Paulo                        |
| EPI_ISL_1303537 | 2021-02-15 | 2021-03-21 | South America / Brazil / Sao Paulo / Sao Paulo                        |
| EPI_ISL_1303539 | 2021-02-15 | 2021-03-21 | South America / Brazil / Sao Paulo / Sao Paulo                        |
| EPI_ISL_1303541 | 2021-02-15 | 2021-03-21 | South America / Brazil / Sao Paulo / Sao Paulo                        |
| EPI_ISL_1303542 | 2021-02-15 | 2021-03-21 | South America / Brazil / Sao Paulo / Ceario Lange                     |
| EPI_ISL_1303543 | 2021-02-15 | 2021-03-21 | South America / Brazil / Sao Paulo / Sao Paulo                        |
| EPI_ISL_1303545 | 2021-02-15 | 2021-03-21 | South America / Brazil / Sao Paulo / Maua                             |
| EPI_ISL_1303546 | 2021-02-15 | 2021-03-21 | South America / Brazil / Sao Paulo / Sao Paulo                        |
| EPI_ISL_1303547 | 2021-02-15 | 2021-03-21 | South America / Brazil / Sao Paulo / Diadema                          |
| EPI_ISL_1303548 | 2021-02-15 | 2021-03-21 | South America / Brazil / Sao Paulo / Sao Paulo                        |
| EPI_ISL_1303549 | 2021-02-16 | 2021-03-21 | South America / Brazil / Sao Paulo / Sao Paulo                        |
| EPI_ISL_1321468 | 2021-01-28 | 2021-03-23 | South America / Chile / Maule / San Clemente                          |
| EPI_ISL_1321469 | 2021-02-25 | 2021-03-23 | South America / Chile / Maule / Talca                                 |
| EPI_ISL_1321470 | 2021-02-24 | 2021-03-23 | South America / Chile / Maule / Molina                                |
| EPI_ISL_1321471 | 2021-02-28 | 2021-03-23 | South America / Chile / Valparaiso / Valparaiso                       |
| EPI_ISL_1321472 | 2021-03-10 | 2021-03-23 | South America / Chile / Region Metropolitana de Santiago / La Pintana |
| EPI_ISL_1321473 | 2021-03-11 | 2021-03-23 | South America / Chile / Region Metropolitana de Santiago / La Granja  |
| EPI_ISL_1358285 | 2021-02-24 | 2021-03-25 | South America / Brazil / Sao Paulo / Sao Paulo                        |
| EPI_ISL_1358286 | 2021-02-24 | 2021-03-25 | South America / Brazil / Sao Paulo / Sao Paulo                        |
| EPI_ISL_1358287 | 2021-03-07 | 2021-03-25 | South America / Brazil / Sao Paulo / Sao Paulo                        |
| EPI_ISL_1358288 | 2021-03-04 | 2021-03-25 | South America / Brazil / Sao Paulo / Aracatuba                        |
| EPI_ISL_1358289 | 2021-03-04 | 2021-03-25 | South America / Brazil / Sao Paulo / Aracatuba                        |
| EPI_ISL_1358290 | 2021-03-04 | 2021-03-25 | South America / Brazil / Sao Paulo / Aracatuba                        |
| EPI_ISL_1358292 | 2021-02-12 | 2021-03-25 | South America / Brazil / Sao Paulo / Diadema                          |
| EPI_ISL_1358293 | 2021-02-11 | 2021-03-25 | South America / Brazil / Sao Paulo / Diadema                          |
| EPI_ISL_1358300 | 2021-02-22 | 2021-03-25 | South America / Brazil / Tocantins / Gurupi                           |
| EPI_ISL_1358301 | 2021-02-22 | 2021-03-25 | South America / Brazil / Tocantins / Palmas                           |
| EPI_ISL_1358304 | 2021-02-10 | 2021-03-25 | South America / Brazil / Mato Grosso do Sul / Campo Grande            |
| EPI_ISL_1358318 | 2021-02-27 | 2021-03-25 | South America / Brazil / Sao Paulo / Sao Paulo                        |
| EPI_ISL_1358319 | 2021-02-27 | 2021-03-25 | South America / Brazil / Sao Paulo / Sao Paulo                        |
| EPI_ISL_1358320 | 2021-02-26 | 2021-03-25 | South America / Brazil / Sao Paulo / Sao Paulo                        |
| EPI_ISL_1358321 | 2021-02-16 | 2021-03-25 | South America / Brazil / Sao Paulo / Diadema                          |
| EPI_ISL_1365747 | 2021-03-12 | 2021-03-26 | South America / Brazil / Sao Paulo / Sao Paulo                        |
| EPI_ISL_1381045 | 2021-02-11 | 2021-03-28 | South America / Brazil / Sao Paulo / Diadema                          |
| EPI_ISL_1381047 | 2021-02-10 | 2021-03-28 | South America / Brazil / Sao Paulo / Diadema                          |

|                 |            |            |                                                            |
|-----------------|------------|------------|------------------------------------------------------------|
| EPI_ISL_1381048 | 2021-02-10 | 2021-03-28 | South America / Brazil / Sao Paulo / Diadema               |
| EPI_ISL_1381050 | 2021-02-11 | 2021-03-28 | South America / Brazil / Sao Paulo / Maua                  |
| EPI_ISL_1381052 | 2021-02-11 | 2021-03-28 | South America / Brazil / Sao Paulo / Maua                  |
| EPI_ISL_1381055 | 2021-02-11 | 2021-03-28 | South America / Brazil / Sao Paulo / Maua                  |
| EPI_ISL_1381056 | 2021-02-11 | 2021-03-28 | South America / Brazil / Sao Paulo / Maua                  |
| EPI_ISL_1381057 | 2021-02-11 | 2021-03-28 | South America / Brazil / Sao Paulo / Rio Grande da Serra   |
| EPI_ISL_1381059 | 2021-02-11 | 2021-03-28 | South America / Brazil / Sao Paulo / Santo Andre           |
| EPI_ISL_1381060 | 2021-02-10 | 2021-03-28 | South America / Brazil / Sao Paulo / Sao Bernardo do Campo |
| EPI_ISL_1381061 | 2021-02-10 | 2021-03-28 | South America / Brazil / Sao Paulo / Sao Bernardo do Campo |
| EPI_ISL_1381062 | 2021-02-10 | 2021-03-28 | South America / Brazil / Sao Paulo / Sao Bernardo do Campo |
| EPI_ISL_1381063 | 2021-02-10 | 2021-03-28 | South America / Brazil / Sao Paulo / Sao Bernardo do Campo |
| EPI_ISL_1381065 | 2021-02-10 | 2021-03-28 | South America / Brazil / Sao Paulo / Sao Bernardo do Campo |
| EPI_ISL_1381068 | 2021-03-02 | 2021-03-28 | South America / Brazil / Sao Paulo / Sao Paulo             |
| EPI_ISL_1381069 | 2021-03-02 | 2021-03-28 | South America / Brazil / Sao Paulo / Sao Paulo             |
| EPI_ISL_1381070 | 2021-03-12 | 2021-03-28 | South America / Brazil / Sao Paulo / Sao Paulo             |
| EPI_ISL_1381071 | 2021-03-12 | 2021-03-28 | South America / Brazil / Sao Paulo / Sao Paulo             |
| EPI_ISL_1381214 | 2021-02-26 | 2021-03-28 | South America / French Guiana / Cayenne                    |
| EPI_ISL_1381216 | 2021-03-01 | 2021-03-28 | South America / French Guiana / Cayenne                    |
| EPI_ISL_1381217 | 2021-03-03 | 2021-03-28 | South America / French Guiana / Cayenne                    |
| EPI_ISL_1381222 | 2021-03-01 | 2021-03-28 | South America / French Guiana / Cayenne                    |
| EPI_ISL_1402431 | 2021-01-07 | 2021-03-30 | South America / Brazil / Amazonas / Manaus                 |
| EPI_ISL_1443196 | 2020-12-28 | 2021-04-01 | South America / Brazil / Bahia / Salvador                  |
| EPI_ISL_1443197 | 2020-12-28 | 2021-04-01 | South America / Brazil / Bahia / Salvador                  |
| EPI_ISL_1443198 | 2020-12-28 | 2021-04-01 | South America / Brazil / Bahia / Salvador                  |
| EPI_ISL_1464627 | 2021-03-09 | 2021-04-02 | South America / Brazil / Sao Paulo / Sao Paulo             |
| EPI_ISL_1464628 | 2021-03-11 | 2021-04-02 | South America / Brazil / Sao Paulo / Sao Paulo             |
| EPI_ISL_1464630 | 2021-03-02 | 2021-04-02 | South America / Brazil / Sao Paulo / Sao Paulo             |
| EPI_ISL_1464631 | 2021-03-02 | 2021-04-02 | South America / Brazil / Sao Paulo / Sao Paulo             |
| EPI_ISL_1464632 | 2021-03-15 | 2021-04-02 | South America / Brazil / Sao Paulo / Sao Paulo             |
| EPI_ISL_1464633 | 2021-03-15 | 2021-04-02 | South America / Brazil / Sao Paulo / Sao Paulo             |
| EPI_ISL_1464634 | 2021-03-14 | 2021-04-02 | South America / Brazil / Sao Paulo / Sao Paulo             |
| EPI_ISL_1464635 | 2021-03-13 | 2021-04-02 | South America / Brazil / Sao Paulo / Sao Paulo             |
| EPI_ISL_1464636 | 2021-03-12 | 2021-04-02 | South America / Brazil / Sao Paulo / Sao Paulo             |
| EPI_ISL_1464637 | 2021-03-12 | 2021-04-02 | South America / Brazil / Sao Paulo / Sao Paulo             |
| EPI_ISL_1464638 | 2021-03-12 | 2021-04-02 | South America / Brazil / Sao Paulo / Sao Paulo             |
| EPI_ISL_1464639 | 2021-03-11 | 2021-04-02 | South America / Brazil / Sao Paulo / Sao Paulo             |
| EPI_ISL_1464640 | 2021-03-11 | 2021-04-02 | South America / Brazil / Sao Paulo / Sao Paulo             |



|                 |            |            |                                                         |
|-----------------|------------|------------|---------------------------------------------------------|
| EPI_ISL_1465196 | 2021-02-19 | 2021-04-02 | South America / Brazil / Maranhao / Sao Luis            |
| EPI_ISL_1465198 | 2021-02-18 | 2021-04-02 | South America / Brazil / Maranhao / Timon               |
| EPI_ISL_1465199 | 2021-02-12 | 2021-04-02 | South America / Brazil / Maranhao / Sao Jose de Ribamar |
| EPI_ISL_1465201 | 2021-02-12 | 2021-04-02 | South America / Brazil / Maranhao / Sao Luis            |
| EPI_ISL_1465202 | 2021-02-11 | 2021-04-02 | South America / Brazil / Maranhao / Sao Luis            |
| EPI_ISL_1465203 | 2021-02-09 | 2021-04-02 | South America / Brazil / Maranhao / Sao Luis            |
| EPI_ISL_1465205 | 2021-02-08 | 2021-04-02 | South America / Brazil / Maranhao / Sao Luis            |
| EPI_ISL_1465206 | 2021-02-07 | 2021-04-02 | South America / Brazil / Maranhao / Imperatriz          |
| EPI_ISL_1465208 | 2021-02-07 | 2021-04-02 | South America / Brazil / Maranhao / Sao Luis            |
| EPI_ISL_1465209 | 2021-02-07 | 2021-04-02 | South America / Brazil / Maranhao / Sao Luis            |
| EPI_ISL_1465210 | 2021-02-06 | 2021-04-02 | South America / Brazil / Maranhao / Sao Luis            |
| EPI_ISL_1465212 | 2021-02-05 | 2021-04-02 | South America / Brazil / Maranhao / Sao Luis            |
| EPI_ISL_1465213 | 2021-02-04 | 2021-04-02 | South America / Brazil / Maranhao / Sao Jose de Ribamar |
| EPI_ISL_1465215 | 2021-02-03 | 2021-04-02 | South America / Brazil / Maranhao / Sao Luis            |
| EPI_ISL_1465216 | 2021-02-01 | 2021-04-02 | South America / Brazil / Maranhao / Sao Luis            |
| EPI_ISL_1465217 | 2021-01-30 | 2021-04-02 | South America / Brazil / Maranhao / Sao Luis            |
| EPI_ISL_1465219 | 2021-01-23 | 2021-04-02 | South America / Brazil / Maranhao / Sao Luis            |
| EPI_ISL_1465220 | 2021-01-23 | 2021-04-02 | South America / Brazil / Parana / Maringa               |
| EPI_ISL_1465221 | 2021-01-19 | 2021-04-02 | South America / Brazil / Maranhao / Sao Luis            |
| EPI_ISL_1465222 | 2021-01-18 | 2021-04-02 | South America / Brazil / Maranhao / Caxias              |
| EPI_ISL_1468413 | 2021-03-16 | 2021-04-03 | South America / Brazil / Goias / Cidade Ocidental       |
| EPI_ISL_1468414 | 2021-03-16 | 2021-04-03 | South America / Brazil / Goias / Goiania                |
| EPI_ISL_1468415 | 2021-03-16 | 2021-04-03 | South America / Brazil / Goias / Goiania                |
| EPI_ISL_1468416 | 2021-02-22 | 2021-04-03 | South America / Brazil / Sao Paulo / Andradina          |
| EPI_ISL_1468417 | 2021-02-02 | 2021-04-03 | South America / Brazil / Sao Paulo / Aracatuba          |
| EPI_ISL_1468418 | 2021-01-11 | 2021-04-03 | South America / Brazil / Sao Paulo / Birigui            |
| EPI_ISL_1468419 | 2021-02-24 | 2021-04-03 | South America / Brazil / Sao Paulo / Aracatuba          |
| EPI_ISL_1468420 | 2021-02-22 | 2021-04-03 | South America / Brazil / Sao Paulo / Birigui            |
| EPI_ISL_1468421 | 2021-02-22 | 2021-04-03 | South America / Brazil / Sao Paulo / Birigui            |
| EPI_ISL_1468422 | 2021-02-17 | 2021-04-03 | South America / Brazil / Sao Paulo / Avanhadava         |
| EPI_ISL_1468423 | 2021-02-17 | 2021-04-03 | South America / Brazil / Sao Paulo / Avanhadava         |
| EPI_ISL_1468424 | 2021-02-22 | 2021-04-03 | South America / Brazil / Sao Paulo / Aracatuba          |
| EPI_ISL_1468425 | 2021-02-16 | 2021-04-03 | South America / Brazil / Sao Paulo / Birigui            |
| EPI_ISL_1468426 | 2021-02-18 | 2021-04-03 | South America / Brazil / Sao Paulo / Matao              |
| EPI_ISL_1468427 | 2021-02-09 | 2021-04-03 | South America / Brazil / Sao Paulo / Matao              |
| EPI_ISL_1468428 | 2021-01-31 | 2021-04-03 | South America / Brazil / Sao Paulo / Taguaritinga       |
| EPI_ISL_1468429 | 2021-02-23 | 2021-04-03 | South America / Brazil / Sao Paulo / Matao              |



|                 |            |            |                                                                         |
|-----------------|------------|------------|-------------------------------------------------------------------------|
| EPI_ISL_1468430 | 2021-02-03 | 2021-04-03 | South America / Brazil / Sao Paulo / Matao                              |
| EPI_ISL_1470421 | 2021-03-08 | 2021-04-05 | South America / Chile / Ñuble / Chillan                                 |
| EPI_ISL_1470429 | 2021-03-15 | 2021-04-05 | South America / Chile / Tarapaca / Iquique                              |
| EPI_ISL_1470430 | 2021-03-15 | 2021-04-05 | South America / Chile / Tarapaca / Iquique                              |
| EPI_ISL_1470436 | 2021-03-17 | 2021-04-05 | South America / Chile / Region Metropolitana de Santiago / Melipilla    |
| EPI_ISL_1470437 | 2021-03-17 | 2021-04-05 | South America / Chile / Region Metropolitana de Santiago / Talagante    |
| EPI_ISL_1470439 | 2021-03-17 | 2021-04-05 | South America / Chile / Region Metropolitana de Santiago / Talagante    |
| EPI_ISL_1470440 | 2021-03-17 | 2021-04-05 | South America / Chile / Region Metropolitana de Santiago / Melipilla    |
| EPI_ISL_1470442 | 2021-03-17 | 2021-04-05 | South America / Chile / Region Metropolitana de Santiago / Melipilla    |
| EPI_ISL_1470451 | 2021-03-22 | 2021-04-05 | South America / Chile / Region Metropolitana de Santiago / San Bernardo |
| EPI_ISL_1470452 | 2021-03-22 | 2021-04-05 | South America / Chile / Region Metropolitana de Santiago / San Bernardo |
| EPI_ISL_1470454 | 2021-03-22 | 2021-04-05 | South America / Chile / Region Metropolitana de Santiago / Las Condes   |
| EPI_ISL_1470457 | 2021-03-21 | 2021-04-05 | South America / Chile / Region Metropolitana de Santiago / Huechuraba   |
| EPI_ISL_1470463 | 2021-03-24 | 2021-04-05 | South America / Chile / Maule / Talca                                   |
| EPI_ISL_1470465 | 2021-03-24 | 2021-04-05 | South America / Chile / Maule / Talca                                   |
| EPI_ISL_1470477 | 2021-03-23 | 2021-04-05 | South America / Chile / Los Lagos / Puerto Montt                        |
| EPI_ISL_1470478 | 2021-03-23 | 2021-04-05 | South America / Chile / Los Lagos / Puerto Montt                        |
| EPI_ISL_1470491 | 2021-03-12 | 2021-04-05 | South America / Chile / Region Metropolitana de Santiago / Puente Alto  |
| EPI_ISL_1470497 | 2021-03-15 | 2021-04-05 | South America / Chile / Region Metropolitana de Santiago / San Ramon    |
| EPI_ISL_1470501 | 2021-03-16 | 2021-04-05 | South America / Chile / Region Metropolitana de Santiago / Puente Alto  |
| EPI_ISL_1470506 | 2021-03-17 | 2021-04-05 | South America / Chile / Region Metropolitana de Santiago / San Ramon    |
| EPI_ISL_1470508 | 2021-03-18 | 2021-04-05 | South America / Chile / Region Metropolitana de Santiago / Puente Alto  |
| EPI_ISL_1470517 | 2021-03-22 | 2021-04-05 | South America / Chile / Region Metropolitana de Santiago / San Ramon    |
| EPI_ISL_1470522 | 2021-03-24 | 2021-04-05 | South America / Chile / Region Metropolitana de Santiago / La Pintana   |
| EPI_ISL_1470523 | 2021-03-24 | 2021-04-05 | South America / Chile / Region Metropolitana de Santiago / La Pintana   |
| EPI_ISL_1470531 | 2021-03-28 | 2021-04-05 | South America / Chile / Maule / Molina                                  |
| EPI_ISL_1470534 | 2021-03-28 | 2021-04-05 | South America / Chile / Maule / Molina                                  |
| EPI_ISL_1470542 | 2021-03-26 | 2021-04-05 | South America / Chile / Los Lagos / Puerto Montt                        |
| EPI_ISL_1470548 | 2021-03-30 | 2021-04-05 | South America / Chile / Tarapaca / Iquique                              |
| EPI_ISL_1470549 | 2021-03-28 | 2021-04-05 | South America / Chile / Tarapaca / Iquique                              |
| EPI_ISL_1470550 | 2021-03-27 | 2021-04-05 | South America / Chile / Tarapaca / Iquique                              |
| EPI_ISL_1470551 | 2021-03-28 | 2021-04-05 | South America / Chile / Tarapaca / Iquique                              |
| EPI_ISL_1470552 | 2021-03-28 | 2021-04-05 | South America / Chile / Tarapaca / Iquique                              |
| EPI_ISL_1470554 | 2021-03-29 | 2021-04-05 | South America / Chile / Tarapaca / Iquique                              |
| EPI_ISL_1470558 | 2021-03-24 | 2021-04-05 | South America / Chile / Region Metropolitana de Santiago / Pudahuel     |
| EPI_ISL_1493573 | 2021-03-13 | 2021-04-06 | South America / Brazil / Goias / Rio Verde                              |
| EPI_ISL_1493574 | 2021-03-13 | 2021-04-06 | South America / Brazil / Goias / Goiania                                |

|                 |            |            |                                                               |
|-----------------|------------|------------|---------------------------------------------------------------|
| EPI_ISL_1493575 | 2021-02-28 | 2021-04-06 | South America / Brazil / Goias / Simao                        |
| EPI_ISL_1493576 | 2021-02-27 | 2021-04-06 | South America / Brazil / Goias / Goiania                      |
| EPI_ISL_1493577 | 2021-02-27 | 2021-04-06 | South America / Brazil / Goias / Trindade                     |
| EPI_ISL_1493578 | 2021-02-26 | 2021-04-06 | South America / Brazil / Rondonia / Porto Velho               |
| EPI_ISL_1493579 | 2021-02-25 | 2021-04-06 | South America / Brazil / Rondonia / Porto Velho               |
| EPI_ISL_1493580 | 2021-02-09 | 2021-04-06 | South America / Brazil / Sao Paulo / Orlandia                 |
| EPI_ISL_1493581 | 2021-02-07 | 2021-04-06 | South America / Brazil / Sao Paulo / Taguaritinga             |
| EPI_ISL_1493582 | 2021-01-31 | 2021-04-06 | South America / Brazil / Sao Paulo / Orlandia                 |
| EPI_ISL_1494923 | 2021-02-23 | 2021-04-07 | South America / Brazil / Sao Paulo / Ituverava                |
| EPI_ISL_1494924 | 2021-02-09 | 2021-04-07 | South America / Brazil / Rondonia / Porto Velho               |
| EPI_ISL_1498380 | 2021-02-17 | 2021-04-07 | South America / Brazil / Sao Paulo / Sao Paulo                |
| EPI_ISL_1498916 | 2021-02-17 | 2021-04-07 | South America / Brazil / Sao Paulo / Sao Paulo                |
| EPI_ISL_1498917 | 2021-02-01 | 2021-04-07 | South America / Brazil / Sao Paulo / Mirandopolis             |
| EPI_ISL_1499105 | 2021-02-15 | 2021-04-07 | South America / Brazil / Sao Paulo / Sao Paulo                |
| EPI_ISL_1509639 | 2021-02-25 | 2021-04-08 | South America / Brazil / Sao Paulo / Auriflama                |
| EPI_ISL_1509720 | 2021-02-16 | 2021-04-08 | South America / Brazil / Sao Paulo / Auriflama                |
| EPI_ISL_1511643 | 2021-01-29 | 2021-04-08 | South America / Brazil / Sao Paulo                            |
| EPI_ISL_1520108 | 2021-03-02 | 2021-04-09 | South America / Brazil / Rondonia / Porto Velho               |
| EPI_ISL_1520109 | 2021-03-03 | 2021-04-09 | South America / Brazil / Rondonia / Porto Velho               |
| EPI_ISL_1520123 | 2021-02-19 | 2021-04-09 | South America / Brazil / Sao Paulo / Espirito Santo do Pinhal |
| EPI_ISL_1520129 | 2021-02-19 | 2021-04-09 | South America / Brazil / Sao Paulo / Mococa                   |
| EPI_ISL_1520130 | 2021-02-19 | 2021-04-09 | South America / Brazil / Sao Paulo / Mococa                   |
| EPI_ISL_1520131 | 2021-02-19 | 2021-04-09 | South America / Brazil / Sao Paulo / Mococa                   |
| EPI_ISL_1520136 | 2021-02-19 | 2021-04-09 | South America / Brazil / Sao Paulo / Mococa                   |
| EPI_ISL_1521321 | 2021-02-23 | 2021-04-09 | South America / Suriname / Suriname                           |
| EPI_ISL_1521322 | 2021-03-22 | 2021-04-09 | South America / Suriname / Suriname                           |
| EPI_ISL_1521323 | 2021-03-20 | 2021-04-09 | South America / Suriname / Suriname                           |
| EPI_ISL_1521324 | 2021-03-01 | 2021-04-09 | South America / Suriname / Suriname                           |
| EPI_ISL_1521325 | 2021-03-05 | 2021-04-09 | South America / Suriname / Suriname                           |
| EPI_ISL_1521326 | 2021-02-22 | 2021-04-09 | South America / Suriname / Suriname                           |
| EPI_ISL_1521327 | 2021-03-23 | 2021-04-09 | South America / Suriname / Suriname                           |
| EPI_ISL_1521328 | 2021-03-23 | 2021-04-09 | South America / Suriname / Suriname                           |
| EPI_ISL_1533609 | 2021-02-09 | 2021-04-10 | South America / Brazil / Amazonas / Manaus                    |
| EPI_ISL_1533689 | 2021-02-19 | 2021-04-10 | South America / Brazil / Sao Paulo / Mococa                   |
| EPI_ISL_1533690 | 2021-02-19 | 2021-04-10 | South America / Brazil / Sao Paulo / Mococa                   |
| EPI_ISL_1533695 | 2021-02-11 | 2021-04-10 | South America / Brazil / Sao Paulo / Campinas                 |
| EPI_ISL_1533696 | 2021-01-28 | 2021-04-10 | South America / Brazil / Sao Paulo / Sao Paulo                |

|                 |            |            |                                                                     |
|-----------------|------------|------------|---------------------------------------------------------------------|
| EPI_ISL_1533699 | 2021-02-10 | 2021-04-10 | South America / Brazil / Sao Paulo / Biritiba-Mirim                 |
| EPI_ISL_1533701 | 2021-02-15 | 2021-04-10 | South America / Brazil / Sao Paulo / Sao Paulo                      |
| EPI_ISL_1533702 | 2021-02-16 | 2021-04-10 | South America / Brazil / Sao Paulo / Sao Paulo                      |
| EPI_ISL_1533703 | 2021-02-20 | 2021-04-10 | South America / Brazil / Sao Paulo / Campinas                       |
| EPI_ISL_1533704 | 2021-02-20 | 2021-04-10 | South America / Brazil / Sao Paulo / Atibaia                        |
| EPI_ISL_1533706 | 2021-02-23 | 2021-04-10 | South America / Brazil / Sao Paulo / Sao Paulo                      |
| EPI_ISL_1533707 | 2021-02-21 | 2021-04-10 | South America / Brazil / Sao Paulo / Sao Paulo                      |
| EPI_ISL_1533709 | 2021-03-02 | 2021-04-10 | South America / Brazil / Sao Paulo / Sao Paulo                      |
| EPI_ISL_1533710 | 2021-03-02 | 2021-04-10 | South America / Brazil / Sao Paulo / Sao Paulo                      |
| EPI_ISL_1533711 | 2021-02-24 | 2021-04-10 | South America / Brazil / Sao Paulo / Sao Paulo                      |
| EPI_ISL_1533712 | 2021-03-09 | 2021-04-10 | South America / Brazil / Sao Paulo / Sao Paulo                      |
| EPI_ISL_1533713 | 2021-03-08 | 2021-04-10 | South America / Brazil / Sao Paulo / Hortolandia                    |
| EPI_ISL_1533714 | 2021-03-06 | 2021-04-10 | South America / Brazil / Sao Paulo / Osasco                         |
| EPI_ISL_1533715 | 2021-03-11 | 2021-04-10 | South America / Brazil / Sao Paulo / Aracatuba                      |
| EPI_ISL_1533716 | 2021-03-10 | 2021-04-10 | South America / Brazil / Sao Paulo / Campo Limpo Paulista           |
| EPI_ISL_1533717 | 2021-03-07 | 2021-04-10 | South America / Brazil / Sao Paulo / Hortolandia                    |
| EPI_ISL_1533718 | 2021-03-07 | 2021-04-10 | South America / Brazil / Sao Paulo / Guarulhos                      |
| EPI_ISL_1533719 | 2021-03-07 | 2021-04-10 | South America / Brazil / Sao Paulo / Holambra                       |
| EPI_ISL_1533720 | 2021-03-06 | 2021-04-10 | South America / Brazil / Sao Paulo / Penapolis                      |
| EPI_ISL_1533722 | 2021-03-09 | 2021-04-10 | South America / Brazil / Sao Paulo / Piracaia                       |
| EPI_ISL_1533723 | 2021-03-08 | 2021-04-10 | South America / Brazil / Sao Paulo / Itaquaquecetuba                |
| EPI_ISL_1533725 | 2021-03-03 | 2021-04-10 | South America / Brazil / Sao Paulo / Guarulhos                      |
| EPI_ISL_1533726 | 2021-03-05 | 2021-04-10 | South America / Brazil / Sao Paulo / Sao Paulo                      |
| EPI_ISL_1533727 | 2021-03-13 | 2021-04-10 | South America / Brazil / Sao Paulo / Sao Paulo                      |
| EPI_ISL_1533992 | 2021-01-27 | 2021-04-10 | South America / Brazil / Santa Catarina / Florianopolis             |
| EPI_ISL_1533993 | 2021-01-28 | 2021-04-10 | South America / Brazil / Santa Catarina / Palhoca                   |
| EPI_ISL_1533994 | 2021-01-28 | 2021-04-10 | South America / Brazil / Santa Catarina / Palhoca                   |
| EPI_ISL_1533996 | 2021-02-01 | 2021-04-10 | South America / Brazil / Santa Catarina / Sao Jose                  |
| EPI_ISL_1533999 | 2021-02-18 | 2021-04-10 | South America / Brazil / Parana / Londrina                          |
| EPI_ISL_1534000 | 2021-02-19 | 2021-04-10 | South America / Brazil / Parana / Londrina                          |
| EPI_ISL_1534001 | 2021-02-19 | 2021-04-10 | South America / Brazil / Parana / Londrina                          |
| EPI_ISL_1534002 | 2021-02-23 | 2021-04-10 | South America / Brazil / Santa Catarina / Joinville                 |
| EPI_ISL_1534003 | 2021-02-23 | 2021-04-10 | South America / Brazil / Santa Catarina / Lages                     |
| EPI_ISL_1534004 | 2021-02-23 | 2021-04-10 | South America / Brazil / Sergipe / Barra dos Coqueiros              |
| EPI_ISL_1534007 | 2021-02-26 | 2021-04-10 | South America / Brazil / Santa Catarina / Balneario Arroio do Silva |
| EPI_ISL_1534008 | 2021-02-26 | 2021-04-10 | South America / Brazil / Santa Catarina / Joinville                 |
| EPI_ISL_1534009 | 2021-02-26 | 2021-04-10 | South America / Brazil / Santa Catarina / Joinville                 |

|                 |            |            |                                                                              |
|-----------------|------------|------------|------------------------------------------------------------------------------|
| EPI_ISL_1534010 | 2021-02-26 | 2021-04-10 | South America / Brazil / Santa Catarina / Joinville                          |
| EPI_ISL_1534011 | 2021-03-11 | 2021-04-10 | South America / Brazil / Rio de Janeiro / Niteroi                            |
| EPI_ISL_1534012 | 2021-03-13 | 2021-04-10 | South America / Brazil / Rio de Janeiro / Paraiba do Sul                     |
| EPI_ISL_1534013 | 2021-03-15 | 2021-04-10 | South America / Brazil / Rio Grande do Sul / Porto Xavier                    |
| EPI_ISL_1534014 | 2021-03-16 | 2021-04-10 | South America / Brazil / Rio de Janeiro / Rio de Janeiro                     |
| EPI_ISL_1534015 | 2021-03-22 | 2021-04-10 | South America / Brazil / Rio de Janeiro / Rio de Janeiro                     |
| EPI_ISL_1534016 | 2021-03-23 | 2021-04-10 | South America / Brazil / Rio de Janeiro / Rio de Janeiro                     |
| EPI_ISL_1534544 | 2021-03-24 | 2021-04-11 | South America / Chile / Region Metropolitana de Santiago / La Granja         |
| EPI_ISL_1534546 | 2021-03-18 | 2021-04-11 | South America / Chile / Region Metropolitana de Santiago / Puente Alto       |
| EPI_ISL_1534547 | 2021-03-17 | 2021-04-11 | South America / Chile / Region Metropolitana de Santiago / Puente Alto       |
| EPI_ISL_1534555 | 2021-03-17 | 2021-04-11 | South America / Chile / Region Metropolitana de Santiago / San Jose De Maipo |
| EPI_ISL_1534556 | 2021-03-17 | 2021-04-11 | South America / Chile / Region Metropolitana de Santiago / San Jose De Maipo |
| EPI_ISL_1534563 | 2021-03-12 | 2021-04-11 | South America / Chile / Region Metropolitana de Santiago / San Jose De Maipo |
| EPI_ISL_1534567 | 2021-03-26 | 2021-04-11 | South America / Chile / Region Metropolitana de Santiago / La Granja         |
| EPI_ISL_1534570 | 2021-03-27 | 2021-04-11 | South America / Chile / Region Metropolitana de Santiago / La Pintana        |
| EPI_ISL_1534572 | 2021-03-27 | 2021-04-11 | South America / Chile / Region Metropolitana de Santiago / San Ramon         |
| EPI_ISL_1534575 | 2021-03-27 | 2021-04-11 | South America / Chile / Region Metropolitana de Santiago / San Ramon         |
| EPI_ISL_1534578 | 2021-03-27 | 2021-04-11 | South America / Chile / Region Metropolitana de Santiago / Puente Alto       |
| EPI_ISL_1534581 | 2021-03-28 | 2021-04-11 | South America / Chile / Region Metropolitana de Santiago / La Granja         |
| EPI_ISL_1534589 | 2021-03-20 | 2021-04-11 | South America / Chile / Region Metropolitana de Santiago / La Granja         |
| EPI_ISL_1534590 | 2021-03-24 | 2021-04-11 | South America / Chile / Region Metropolitana de Santiago / La Pintana        |
| EPI_ISL_1534593 | 2021-03-29 | 2021-04-11 | South America / Chile / Region Metropolitana de Santiago / Santiago          |
| EPI_ISL_1534596 | 2021-03-30 | 2021-04-11 | South America / Chile / Region Metropolitana de Santiago / Pudahuel          |
| EPI_ISL_1534601 | 2021-03-30 | 2021-04-11 | South America / Chile / Region Metropolitana de Santiago / Santiago          |
| EPI_ISL_1534602 | 2021-03-29 | 2021-04-11 | South America / Chile / Tarapaca / Iquique                                   |
| EPI_ISL_1534603 | 2021-03-30 | 2021-04-11 | South America / Chile / Tarapaca / Iquique                                   |
| EPI_ISL_1534604 | 2021-03-30 | 2021-04-11 | South America / Chile / Tarapaca / Iquique                                   |
| EPI_ISL_1534605 | 2021-03-28 | 2021-04-11 | South America / Chile / Valparaiso / Valparaiso                              |
| EPI_ISL_1534606 | 2021-03-29 | 2021-04-11 | South America / Chile / Valparaiso / Valparaiso                              |
| EPI_ISL_1540997 | 2021-03-14 | 2021-04-12 | South America / Chile / Region Metropolitana de Santiago / San Jose De Maipo |
| EPI_ISL_1541006 | 2021-03-15 | 2021-04-12 | South America / Chile / Region Metropolitana de Santiago / La Granja         |
| EPI_ISL_1541007 | 2021-03-15 | 2021-04-12 | South America / Chile / Region Metropolitana de Santiago / La Granja         |
| EPI_ISL_1541015 | 2021-03-29 | 2021-04-12 | South America / Chile / La Araucania / Temuco                                |
| EPI_ISL_1583672 | 2021-03-02 | 2021-04-14 | South America / Brazil / Bahia                                               |
| EPI_ISL_1583673 | 2021-03-03 | 2021-04-14 | South America / Brazil / Bahia                                               |
| EPI_ISL_1583674 | 2021-02-08 | 2021-04-14 | South America / Brazil / Bahia                                               |
| EPI_ISL_1583675 | 2021-03-02 | 2021-04-14 | South America / Brazil / Bahia                                               |

|                 |            |            |                                                |
|-----------------|------------|------------|------------------------------------------------|
| EPI_ISL_1583676 | 2021-03-05 | 2021-04-14 | South America / Brazil / Bahia                 |
| EPI_ISL_1583677 | 2021-02-06 | 2021-04-14 | South America / Brazil / Bahia                 |
| EPI_ISL_1583679 | 2021-03-04 | 2021-04-14 | South America / Brazil / Bahia                 |
| EPI_ISL_1583680 | 2021-02-19 | 2021-04-14 | South America / Brazil / Bahia                 |
| EPI_ISL_1583681 | 2021-03-02 | 2021-04-14 | South America / Brazil / Bahia                 |
| EPI_ISL_1583682 | 2021-02-08 | 2021-04-14 | South America / Brazil / Bahia                 |
| EPI_ISL_1583683 | 2021-02-12 | 2021-04-14 | South America / Brazil / Bahia                 |
| EPI_ISL_1583694 | 2021-03-12 | 2021-04-14 | South America / Brazil / Bahia                 |
| EPI_ISL_1583697 | 2021-02-23 | 2021-04-14 | South America / Brazil / Bahia                 |
| EPI_ISL_1583700 | 2021-02-12 | 2021-04-14 | South America / Brazil / Bahia                 |
| EPI_ISL_1583719 | 2021-02-23 | 2021-04-14 | South America / Brazil / Bahia                 |
| EPI_ISL_1583722 | 2021-02-23 | 2021-04-14 | South America / Brazil / Bahia                 |
| EPI_ISL_1583725 | 2021-03-01 | 2021-04-14 | South America / Brazil / Bahia                 |
| EPI_ISL_1583730 | 2021-03-05 | 2021-04-14 | South America / Brazil / Bahia                 |
| EPI_ISL_1583733 | 2021-02-26 | 2021-04-14 | South America / Brazil / Bahia                 |
| EPI_ISL_1591098 | 2021-02-22 | 2021-04-14 | South America / Peru                           |
| EPI_ISL_1593463 | 2021-03-12 | 2021-04-15 | South America / French Guiana / Cayenne        |
| EPI_ISL_1593464 | 2021-03-15 | 2021-04-15 | South America / French Guiana / Regina         |
| EPI_ISL_1593466 | 2021-03-15 | 2021-04-15 | South America / French Guiana / Grand Santi    |
| EPI_ISL_1593470 | 2021-03-19 | 2021-04-15 | South America / French Guiana / Cayenne        |
| EPI_ISL_1593471 | 2021-03-19 | 2021-04-15 | South America / French Guiana / Cayenne        |
| EPI_ISL_1593980 | 2021-03-02 | 2021-04-15 | South America / French Guiana / Regina         |
| EPI_ISL_1593984 | 2021-03-05 | 2021-04-15 | South America / French Guiana / Kourou         |
| EPI_ISL_1608161 | 2021-02-07 | 2021-04-15 | South America / Brazil / Bahia / Salvador      |
| EPI_ISL_1608162 | 2021-02-06 | 2021-04-15 | South America / Brazil / Bahia / Salvador      |
| EPI_ISL_1608163 | 2021-02-10 | 2021-04-15 | South America / Brazil / Bahia / Salvador      |
| EPI_ISL_1608164 | 2021-02-16 | 2021-04-15 | South America / Brazil / Bahia / Salvador      |
| EPI_ISL_1608165 | 2021-02-08 | 2021-04-15 | South America / Brazil / Bahia / Salvador      |
| EPI_ISL_1608166 | 2021-02-17 | 2021-04-15 | South America / Brazil / Bahia / Salvador      |
| EPI_ISL_1608167 | 2021-02-12 | 2021-04-15 | South America / Brazil / Bahia / Salvador      |
| EPI_ISL_1608168 | 2021-02-13 | 2021-04-15 | South America / Brazil / Bahia / Salvador      |
| EPI_ISL_1608169 | 2021-02-20 | 2021-04-15 | South America / Brazil / Bahia / Salvador      |
| EPI_ISL_1608170 | 2021-02-23 | 2021-04-15 | South America / Brazil / Bahia / Salvador      |
| EPI_ISL_1608171 | 2021-02-21 | 2021-04-15 | South America / Brazil / Bahia / Salvador      |
| EPI_ISL_1625972 | 2021-03-12 | 2021-04-16 | South America / Brazil / Sao Paulo / Sao Paulo |
| EPI_ISL_1625974 | 2021-03-15 | 2021-04-16 | South America / Brazil / Sao Paulo / Aracatuba |
| EPI_ISL_1625975 | 2021-03-07 | 2021-04-16 | South America / Brazil / Sao Paulo / Sumare    |

|                 |            |            |                                                         |
|-----------------|------------|------------|---------------------------------------------------------|
| EPI_ISL_1625976 | 2021-03-08 | 2021-04-16 | South America / Brazil / Sao Paulo / Divinolandia       |
| EPI_ISL_1625978 | 2021-02-15 | 2021-04-16 | South America / Brazil / Sao Paulo / Rio Claro          |
| EPI_ISL_1625984 | 2021-02-18 | 2021-04-16 | South America / Brazil / Sao Paulo / Araras             |
| EPI_ISL_1625986 | 2021-02-18 | 2021-04-16 | South America / Brazil / Sao Paulo / Rio Claro          |
| EPI_ISL_1625987 | 2021-02-20 | 2021-04-16 | South America / Brazil / Sao Paulo / Rio Claro          |
| EPI_ISL_1625988 | 2021-02-20 | 2021-04-16 | South America / Brazil / Sao Paulo / Rio Claro          |
| EPI_ISL_1625989 | 2021-02-21 | 2021-04-16 | South America / Brazil / Sao Paulo / Limeira            |
| EPI_ISL_1625990 | 2021-02-21 | 2021-04-16 | South America / Brazil / Sao Paulo / Leme               |
| EPI_ISL_1625991 | 2021-02-23 | 2021-04-16 | South America / Brazil / Sao Paulo / Aguas de Sao Pedro |
| EPI_ISL_1625992 | 2021-02-24 | 2021-04-16 | South America / Brazil / Sao Paulo / Limeira            |
| EPI_ISL_1625993 | 2021-02-26 | 2021-04-16 | South America / Brazil / Sao Paulo / Leme               |
| EPI_ISL_1625994 | 2021-02-26 | 2021-04-16 | South America / Brazil / Sao Paulo / Leme               |
| EPI_ISL_1625995 | 2021-02-26 | 2021-04-16 | South America / Brazil / Sao Paulo / Rio Claro          |
| EPI_ISL_1625997 | 2021-02-25 | 2021-04-16 | South America / Brazil / Sao Paulo / Rio Claro          |
| EPI_ISL_1625998 | 2021-02-25 | 2021-04-16 | South America / Brazil / Sao Paulo / Rio Claro          |
| EPI_ISL_1625999 | 2021-02-26 | 2021-04-16 | South America / Brazil / Sao Paulo / Rio Claro          |
| EPI_ISL_1626001 | 2021-02-28 | 2021-04-16 | South America / Brazil / Sao Paulo / Rio Claro          |
| EPI_ISL_1626002 | 2021-02-28 | 2021-04-16 | South America / Brazil / Sao Paulo / Rio Claro          |
| EPI_ISL_1626003 | 2021-02-28 | 2021-04-16 | South America / Brazil / Sao Paulo / Rio Claro          |
| EPI_ISL_1626004 | 2021-02-28 | 2021-04-16 | South America / Brazil / Sao Paulo / Rio Claro          |
| EPI_ISL_1626006 | 2021-02-27 | 2021-04-16 | South America / Brazil / Sao Paulo / Rio Claro          |
| EPI_ISL_1626606 | 2021-02-27 | 2021-04-16 | South America / Brazil / Sao Paulo / Rio Claro          |
| EPI_ISL_1626613 | 2021-03-26 | 2021-04-17 | South America / Colombia / Bogota                       |
| EPI_ISL_1626615 | 2021-03-24 | 2021-04-17 | South America / Colombia / Bogota                       |
| EPI_ISL_1626616 | 2021-03-29 | 2021-04-17 | South America / Colombia / Bogota                       |
| EPI_ISL_1626618 | 2021-03-25 | 2021-04-17 | South America / Colombia / Bogota                       |
| EPI_ISL_1628344 | 2021-03-14 | 2021-04-17 | South America / Brazil / Sao Paulo / Sao Paulo          |
| EPI_ISL_1628347 | 2021-03-13 | 2021-04-17 | South America / Brazil / Sao Paulo / Registro           |
| EPI_ISL_1628348 | 2021-03-12 | 2021-04-17 | South America / Brazil / Sao Paulo / Registro           |
| EPI_ISL_1628349 | 2021-03-13 | 2021-04-17 | South America / Brazil / Sao Paulo / Registro           |
| EPI_ISL_1628350 | 2021-03-13 | 2021-04-17 | South America / Brazil / Sao Paulo / Jacupiranga        |
| EPI_ISL_1628351 | 2021-03-13 | 2021-04-17 | South America / Brazil / Sao Paulo / Registro           |
| EPI_ISL_1628352 | 2021-03-13 | 2021-04-17 | South America / Brazil / Sao Paulo / Registro           |
| EPI_ISL_1628353 | 2021-03-13 | 2021-04-17 | South America / Brazil / Sao Paulo / Registro           |
| EPI_ISL_1628354 | 2021-03-14 | 2021-04-17 | South America / Brazil / Sao Paulo / Jacupiranga        |
| EPI_ISL_1628355 | 2021-03-17 | 2021-04-17 | South America / Brazil / Sao Paulo / Cajati             |
| EPI_ISL_1628356 | 2021-03-17 | 2021-04-17 | South America / Brazil / Sao Paulo / Cajati             |

|                 |            |            |                                                                              |
|-----------------|------------|------------|------------------------------------------------------------------------------|
| EPI_ISL_1628357 | 2021-03-17 | 2021-04-17 | South America / Brazil / Sao Paulo / Cajati                                  |
| EPI_ISL_1628358 | 2021-03-17 | 2021-04-17 | South America / Brazil / Sao Paulo / Cajati                                  |
| EPI_ISL_1628359 | 2021-03-15 | 2021-04-17 | South America / Brazil / Sao Paulo / Sao Joao da Boa Vista                   |
| EPI_ISL_1628360 | 2021-03-17 | 2021-04-17 | South America / Brazil / Sao Paulo / Pariquera Acu                           |
| EPI_ISL_1628361 | 2021-03-17 | 2021-04-17 | South America / Brazil / Sao Paulo / Pedro de Toledo                         |
| EPI_ISL_1628362 | 2021-03-17 | 2021-04-17 | South America / Brazil / Sao Paulo / Pariquera Acu                           |
| EPI_ISL_1628363 | 2021-03-11 | 2021-04-17 | South America / Brazil / Goias / Aparecida de Goiania                        |
| EPI_ISL_1628364 | 2021-03-16 | 2021-04-17 | South America / Brazil / Goias / Goiania                                     |
| EPI_ISL_1628365 | 2021-03-17 | 2021-04-17 | South America / Brazil / Goias / Goiania                                     |
| EPI_ISL_1628366 | 2021-03-18 | 2021-04-17 | South America / Brazil / Sao Paulo / Patrocinio Paulista                     |
| EPI_ISL_1628367 | 2021-03-18 | 2021-04-17 | South America / Brazil / Sao Paulo / Guaira                                  |
| EPI_ISL_1628368 | 2021-03-16 | 2021-04-17 | South America / Brazil / Sao Paulo / Pradopolis                              |
| EPI_ISL_1628369 | 2021-03-10 | 2021-04-17 | South America / Brazil / Sao Paulo / Robeirao Preto                          |
| EPI_ISL_1628370 | 2021-03-09 | 2021-04-17 | South America / Brazil / Sao Paulo / Taguaritinga                            |
| EPI_ISL_1628372 | 2021-03-15 | 2021-04-17 | South America / Brazil / Sao Paulo / Morro Agudo                             |
| EPI_ISL_1628373 | 2021-03-22 | 2021-04-17 | South America / Brazil / Sao Paulo / Bebedouro                               |
| EPI_ISL_1628374 | 2021-03-05 | 2021-04-17 | South America / Brazil / Sao Paulo / Cravinhos                               |
| EPI_ISL_1628375 | 2021-03-18 | 2021-04-17 | South America / Brazil / Sao Paulo / Guariba                                 |
| EPI_ISL_1628376 | 2021-03-19 | 2021-04-17 | South America / Brazil / Sao Paulo / Guariba                                 |
| EPI_ISL_1628377 | 2021-03-09 | 2021-04-17 | South America / Brazil / Sao Paulo / Ibitinga                                |
| EPI_ISL_1628378 | 2021-03-21 | 2021-04-17 | South America / Brazil / Sao Paulo / Jardinopolis                            |
| EPI_ISL_1628379 | 2021-03-08 | 2021-04-17 | South America / Brazil / Sao Paulo / Robeirao Preto                          |
| EPI_ISL_1628380 | 2021-03-19 | 2021-04-17 | South America / Brazil / Sao Paulo / Ibitinga                                |
| EPI_ISL_1633373 | 2021-03-31 | 2021-04-19 | South America / Chile / Los Rios / Lago Ranco                                |
| EPI_ISL_1633473 | 2021-03-13 | 2021-04-19 | South America / Chile / Region Metropolitana de Santiago / La Pintana        |
| EPI_ISL_1633475 | 2021-03-21 | 2021-04-19 | South America / Chile / Region Metropolitana de Santiago / San Jose De Maipo |
| EPI_ISL_1633478 | 2021-03-28 | 2021-04-19 | South America / Chile / Maule / Curico                                       |
| EPI_ISL_1633494 | 2021-03-30 | 2021-04-19 | South America / Chile / Region Metropolitana de Santiago / La Granja         |
| EPI_ISL_1633502 | 2021-03-30 | 2021-04-19 | South America / Chile / Region Metropolitana de Santiago / La Pintana        |
| EPI_ISL_811149  | 2020-12-30 | 2021-01-13 | South America / Brazil / Amazonas / Manaus                                   |
| EPI_ISL_833136  | 2020-12-29 | 2021-01-17 | South America / Brazil / Amazonas / Manaus                                   |
| EPI_ISL_833137  | 2020-12-04 | 2021-01-17 | South America / Brazil / Amazonas / Manaus                                   |
| EPI_ISL_833138  | 2020-12-21 | 2021-01-17 | South America / Brazil / Amazonas / Manaus                                   |
| EPI_ISL_833139  | 2020-12-22 | 2021-01-17 | South America / Brazil / Amazonas / Manaus                                   |
| EPI_ISL_833140  | 2020-12-23 | 2021-01-17 | South America / Brazil / Amazonas / Manaus                                   |
| EPI_ISL_833167  | 2020-12-16 | 2021-01-17 | South America / Brazil / Amazonas                                            |
| EPI_ISL_833169  | 2020-12-23 | 2021-01-17 | South America / Brazil / Amazonas                                            |

|                |            |            |                                                |
|----------------|------------|------------|------------------------------------------------|
| EPI_ISL_833170 | 2020-12-23 | 2021-01-17 | South America / Brazil / Amazonas              |
| EPI_ISL_833171 | 2020-12-17 | 2021-01-17 | South America / Brazil / Amazonas              |
| EPI_ISL_833172 | 2020-12-17 | 2021-01-17 | South America / Brazil / Amazonas              |
| EPI_ISL_833173 | 2020-12-18 | 2021-01-17 | South America / Brazil / Amazonas              |
| EPI_ISL_833174 | 2020-12-22 | 2021-01-17 | South America / Brazil / Amazonas              |
| EPI_ISL_872191 | 2021-01-15 | 2021-01-26 | South America / Brazil / Sao Paulo / Sao Paulo |
| EPI_ISL_872192 | 2021-01-18 | 2021-01-26 | South America / Brazil / Sao Paulo / Sao Paulo |
| EPI_ISL_875688 | 2021-01-04 | 2021-01-26 | South America / Brazil / Sao Paulo / Sao Paulo |
| EPI_ISL_875689 | 2021-01-15 | 2021-01-26 | South America / Brazil / Sao Paulo / Sao Paulo |
| EPI_ISL_904120 | 2021-01-10 | 2021-01-30 | South America / Brazil / Para                  |
| EPI_ISL_904121 | 2021-01-08 | 2021-01-30 | South America / Brazil / Para                  |
| EPI_ISL_906068 | 2021-01-15 | 2021-01-31 | South America / Brazil / Sao Paulo / Campinas  |
| EPI_ISL_906069 | 2021-01-15 | 2021-01-31 | South America / Brazil / Amazonas / Manaus     |
| EPI_ISL_906071 | 2021-01-19 | 2021-01-31 | South America / Brazil / Amazonas / Manaus     |
| EPI_ISL_906075 | 2021-01-19 | 2021-01-31 | South America / Brazil / Amazonas / Manaus     |
| EPI_ISL_906076 | 2021-01-19 | 2021-01-31 | South America / Brazil / Amazonas / Manaus     |
| EPI_ISL_906077 | 2021-01-19 | 2021-01-31 | South America / Brazil / Amazonas / Manaus     |
| EPI_ISL_906080 | 2021-01-22 | 2021-01-31 | South America / Brazil / Amazonas / Manaus     |
| EPI_ISL_906081 | 2021-01-22 | 2021-01-31 | South America / Brazil / Amazonas / Manaus     |
| EPI_ISL_918499 | 2020-12-21 | 2021-02-03 | South America / Brazil / Amazonas              |
| EPI_ISL_918500 | 2020-12-28 | 2021-02-03 | South America / Brazil / Amazonas              |
| EPI_ISL_918501 | 2020-12-28 | 2021-02-03 | South America / Brazil / Amazonas              |
| EPI_ISL_918502 | 2020-12-29 | 2021-02-03 | South America / Brazil / Amazonas              |
| EPI_ISL_918503 | 2020-12-28 | 2021-02-03 | South America / Brazil / Amazonas              |
| EPI_ISL_918504 | 2020-12-21 | 2021-02-03 | South America / Brazil / Amazonas              |
| EPI_ISL_918505 | 2020-12-30 | 2021-02-03 | South America / Brazil / Amazonas              |
| EPI_ISL_918506 | 2020-12-30 | 2021-02-03 | South America / Brazil / Amazonas              |
| EPI_ISL_918507 | 2021-01-05 | 2021-02-03 | South America / Brazil / Amazonas              |
| EPI_ISL_918508 | 2021-01-05 | 2021-02-03 | South America / Brazil / Amazonas              |
| EPI_ISL_918509 | 2021-01-06 | 2021-02-03 | South America / Brazil / Amazonas              |
| EPI_ISL_918510 | 2021-01-07 | 2021-02-03 | South America / Brazil / Amazonas              |
| EPI_ISL_918511 | 2020-12-30 | 2021-02-03 | South America / Brazil / Amazonas              |
| EPI_ISL_940614 | 2021-01-19 | 2021-02-05 | South America / Brazil / Amazonas / Manaus     |
| EPI_ISL_940615 | 2021-01-19 | 2021-02-05 | South America / Brazil / Amazonas / Manaus     |
| EPI_ISL_940616 | 2021-01-19 | 2021-02-05 | South America / Brazil / Amazonas / Manaus     |
| EPI_ISL_940617 | 2021-01-19 | 2021-02-05 | South America / Brazil / Amazonas / Manaus     |
| EPI_ISL_940618 | 2021-01-19 | 2021-02-05 | South America / Brazil / Amazonas / Manaus     |



|                |            |            |                                                           |
|----------------|------------|------------|-----------------------------------------------------------|
| EPI_ISL_940619 | 2021-01-15 | 2021-02-05 | South America / Brazil / Sao Paulo / Sao Paulo            |
| EPI_ISL_940620 | 2021-01-14 | 2021-02-05 | South America / Brazil / Amazonas / Manaus                |
| EPI_ISL_940621 | 2021-01-14 | 2021-02-05 | South America / Brazil / Sao Paulo / Sao Paulo            |
| EPI_ISL_940622 | 2021-01-15 | 2021-02-05 | South America / Brazil / Sao Paulo / Sao Paulo            |
| EPI_ISL_940623 | 2021-01-08 | 2021-02-05 | South America / Brazil / Amazonas / Manaus                |
| EPI_ISL_940624 | 2021-01-15 | 2021-02-05 | South America / Brazil / Amazonas / Manaus                |
| EPI_ISL_940625 | 2021-01-19 | 2021-02-05 | South America / Brazil / Sao Paulo / Sao Paulo            |
| EPI_ISL_940626 | 2021-01-21 | 2021-02-05 | South America / Brazil / Amazonas / Manaus                |
| EPI_ISL_940627 | 2021-01-22 | 2021-02-05 | South America / Brazil / Amazonas / Manaus                |
| EPI_ISL_940630 | 2021-01-25 | 2021-02-05 | South America / Brazil / Roraima                          |
| EPI_ISL_943570 | 2021-01-28 | 2021-02-06 | South America / Peru / Lima                               |
| EPI_ISL_943967 | 2021-01-25 | 2021-02-07 | South America / Brazil / Roraima                          |
| EPI_ISL_943968 | 2021-01-25 | 2021-02-07 | South America / Brazil / Roraima                          |
| EPI_ISL_943969 | 2021-01-25 | 2021-02-07 | South America / Brazil / Roraima                          |
| EPI_ISL_943970 | 2021-01-25 | 2021-02-07 | South America / Brazil / Roraima                          |
| EPI_ISL_943971 | 2021-01-25 | 2021-02-07 | South America / Brazil / Roraima                          |
| EPI_ISL_943987 | 2021-01-20 | 2021-02-07 | South America / Brazil / Tocantins / Paraiso do Tocantins |
| EPI_ISL_943990 | 2021-01-19 | 2021-02-07 | South America / Brazil / Amazonas / Manaus                |
| EPI_ISL_981383 | 2021-01-20 | 2021-02-12 | South America / Brazil / Sao Paulo / Jau                  |
| EPI_ISL_981385 | 2021-01-25 | 2021-02-12 | South America / Brazil / Sao Paulo / Jau                  |
| EPI_ISL_981387 | 2021-01-18 | 2021-02-12 | South America / Brazil / Sao Paulo / Jau                  |
| EPI_ISL_983865 | 2021-02-01 | 2021-02-12 | South America / Brazil / Rio Grande do Sul / Gramado      |
| EPI_ISL_984619 | 2021-02-03 | 2021-02-13 | South America / Brazil / Rio Grande do Sul                |
| EPI_ISL_985303 | 2021-01-19 | 2021-02-15 | South America / Brazil / Goias / Aparecida de Goiania     |
| EPI_ISL_985304 | 2021-01-19 | 2021-02-15 | South America / Brazil / Goias / Aparecida de Goiania     |
| EPI_ISL_985305 | 2021-01-19 | 2021-02-15 | South America / Brazil / Goias / Aparecida de Goiania     |
| EPI_ISL_985306 | 2021-01-19 | 2021-02-15 | South America / Brazil / Goias / Aparecida de Goiania     |
| EPI_ISL_985307 | 2021-01-19 | 2021-02-15 | South America / Brazil / Goias / Aparecida de Goiania     |
| EPI_ISL_985308 | 2021-01-19 | 2021-02-15 | South America / Brazil / Goias / Aparecida de Goiania     |
| EPI_ISL_985309 | 2021-01-19 | 2021-02-15 | South America / Brazil / Goias / Aparecida de Goiania     |
| EPI_ISL_985310 | 2021-01-19 | 2021-02-15 | South America / Brazil / Goias / Aparecida de Goiania     |
| EPI_ISL_985311 | 2021-01-19 | 2021-02-15 | South America / Brazil / Goias / Aparecida de Goiania     |
| EPI_ISL_985312 | 2021-01-19 | 2021-02-15 | South America / Brazil / Goias / Aparecida de Goiania     |
| EPI_ISL_985313 | 2021-01-19 | 2021-02-15 | South America / Brazil / Goias / Aparecida de Goiania     |
| EPI_ISL_985314 | 2021-01-19 | 2021-02-15 | South America / Brazil / Goias / Aparecida de Goiania     |
| EPI_ISL_985315 | 2021-01-19 | 2021-02-15 | South America / Brazil / Goias / Aparecida de Goiania     |
| EPI_ISL_985316 | 2021-01-19 | 2021-02-15 | South America / Brazil / Goias / Aparecida de Goiania     |

|                |            |            |                                                         |
|----------------|------------|------------|---------------------------------------------------------|
| EPI_ISL_985317 | 2021-01-19 | 2021-02-15 | South America / Brazil / Goias / Aparecida de Goiania   |
| EPI_ISL_985318 | 2021-01-08 | 2021-02-15 | South America / Brazil / Santa Catarina / Florianopolis |
| EPI_ISL_985319 | 2021-01-12 | 2021-02-15 | South America / Brazil / Santa Catarina / Florianopolis |

**Supplementary Table 3.** SARS-CoV-2 introductions of P.1 lineage in Uruguay and synapomorphic sites defining each Uruguayan clade. Columns show the identified Uruguayan P.1 clade, the number of samples per clade, the Uruguayan departamentos where de clade is present (and number of samples), the  $T_{MRCA}$  as estimated by BEAST (and range of the 95% confidence interval), and a description of the synapomorphies defining each clade (for those with at least three samples).

| Clade      | N       | Departments                                     | $T_{MRCA}$               | Genomic Region | Nucleotide | AA     | AA replacement |
|------------|---------|-------------------------------------------------|--------------------------|----------------|------------|--------|----------------|
| UY-I       | 24      | AR (2), CA, MO (5), RN (11), SA (2), SJ, SO (2) | 15 Feb (31 Jan - 27 Feb) | ORF1a (NSP3)   | G8102T     | V1795F | radical        |
| UY-II      | 12      | CA (2), CO, MO (2), RN (5), SJ (2)              | 17 Feb (23 Jan - 04 Mar) | ORF1a (NSP3)   | A3957G     | K413R  | conservative   |
|            |         |                                                 |                          | M              | T26597C    | G25G   | --             |
|            |         |                                                 |                          | ORF8           | T27986C    | Y31Y   | --             |
|            |         |                                                 |                          | 3'UTR          | G29760A    | --     | --             |
| UY-III     | 7       | CA (4), MO (3)                                  | 01 Mar (20 Feb - 05 Mar) | ORF1a (NSP3)   | C5310T     | T864I  | radical        |
|            |         |                                                 |                          | ORF1a (NSP4)   | G8849T     | V99L   | conservative   |
|            |         |                                                 |                          | ORF1a (NSP5)   | C10507T    | N151N  | --             |
|            |         |                                                 |                          | ORF1a (NSP6)   | C11074T    | F34F   | --             |
|            |         |                                                 |                          | ORF3a          | T26171A    | M260K  | radical        |
| Intergenic | C27389A | --                                              | --                       |                |            |        |                |
| UY-IV      | 4       | CA, SJ (2), SO                                  | 28 Feb (19 Feb - 05 Mar) | ORF3a          | A25450G    | I20V   | conservative   |
| UY-V*      | 3       | RO (3)                                          | 21 Feb (12 Feb - 23 Feb) | ORF1b (NSP13)  | G17797A    | V521I  | conservative   |
|            |         |                                                 |                          | Spike          | G22471T    | L303F  | radical        |
| UY-VI      | 3       | RO (3)                                          | 15 Feb (01 Feb - 22 Feb) | ORF1a (NSP5)   | A10323G    | K90R   | conservative   |
|            |         |                                                 |                          | ORF1a (NSP6)   | C11001T    | T10I   | radical        |
| UY-VII     | 1       | AR                                              | -                        |                |            |        |                |

|         |   |    |   |  |  |  |
|---------|---|----|---|--|--|--|
| UY-VIII | 1 | AR | - |  |  |  |
| UY-VIII | 1 | MO | - |  |  |  |
| UY-X    | 1 | RN | - |  |  |  |
| UY-XI   | 1 | SA | - |  |  |  |
| UY-XII  | 1 | TA | - |  |  |  |

\*Clade UY-V is defined by two synapomorphies, one being the non-synonymous S:L303F change in the spike protein. This change has been reported before, being present in 41 sequences in Europe and USA (mainly in B.1.1.7 sequences) and involves a radical replacement regarding amino acid volume and aromaticity. Other radical changes here described have not been reported in South America before, except for NSP3:T864I (radical replacement in polarity; previously found in Brazil and Chile) and NSP3:V1795F (radical replacement in volume and aromaticity; previously found in Brazil).

**Supplementary Table 4.** Primers and probe designed for ORF1ab drop-out qPCR.

| Name                 | Sequence                                               |
|----------------------|--------------------------------------------------------|
| ORF1a_11247-11267_Fw | TGCGTATTATGACATGGTTGG                                  |
| ORF1a_11369-11388_Rv | ACTCTCCTAGCACCATCATC                                   |
| ORF1a_11272-11300_Pb | /5Cy5/GGTTGATAC/TAO/TAGTTTGTCTGG<br>TTTTAAGC/3IAbRQSp/ |

**4. Supplementary Figures**

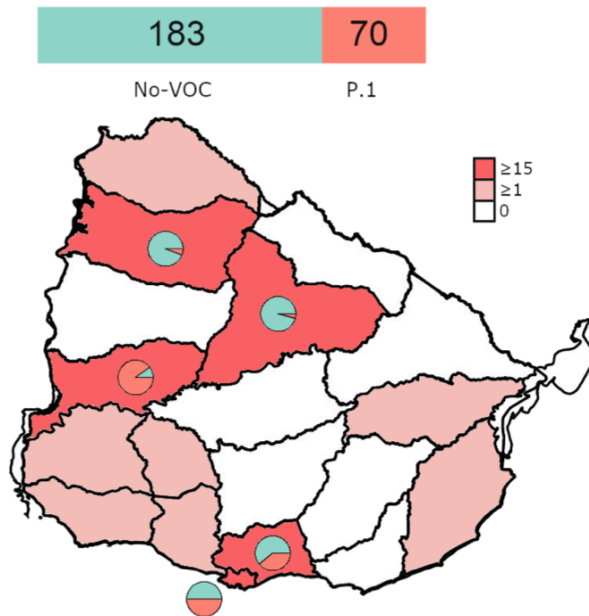

**Supplementary Figure 1:** Barplot showing proportions of P.1 and no-VOCs. Total numbers of samples in each category are shown (top). Uruguayan map with P.1 locations marked in red. Locations with more than 15 samples are marked in dark red and between one and 14 with light red. Pie charts indicate proportions of VOC and No-VOCs in departments with a high number of samples (more than 15): VOC in red and no-VOCs in green.

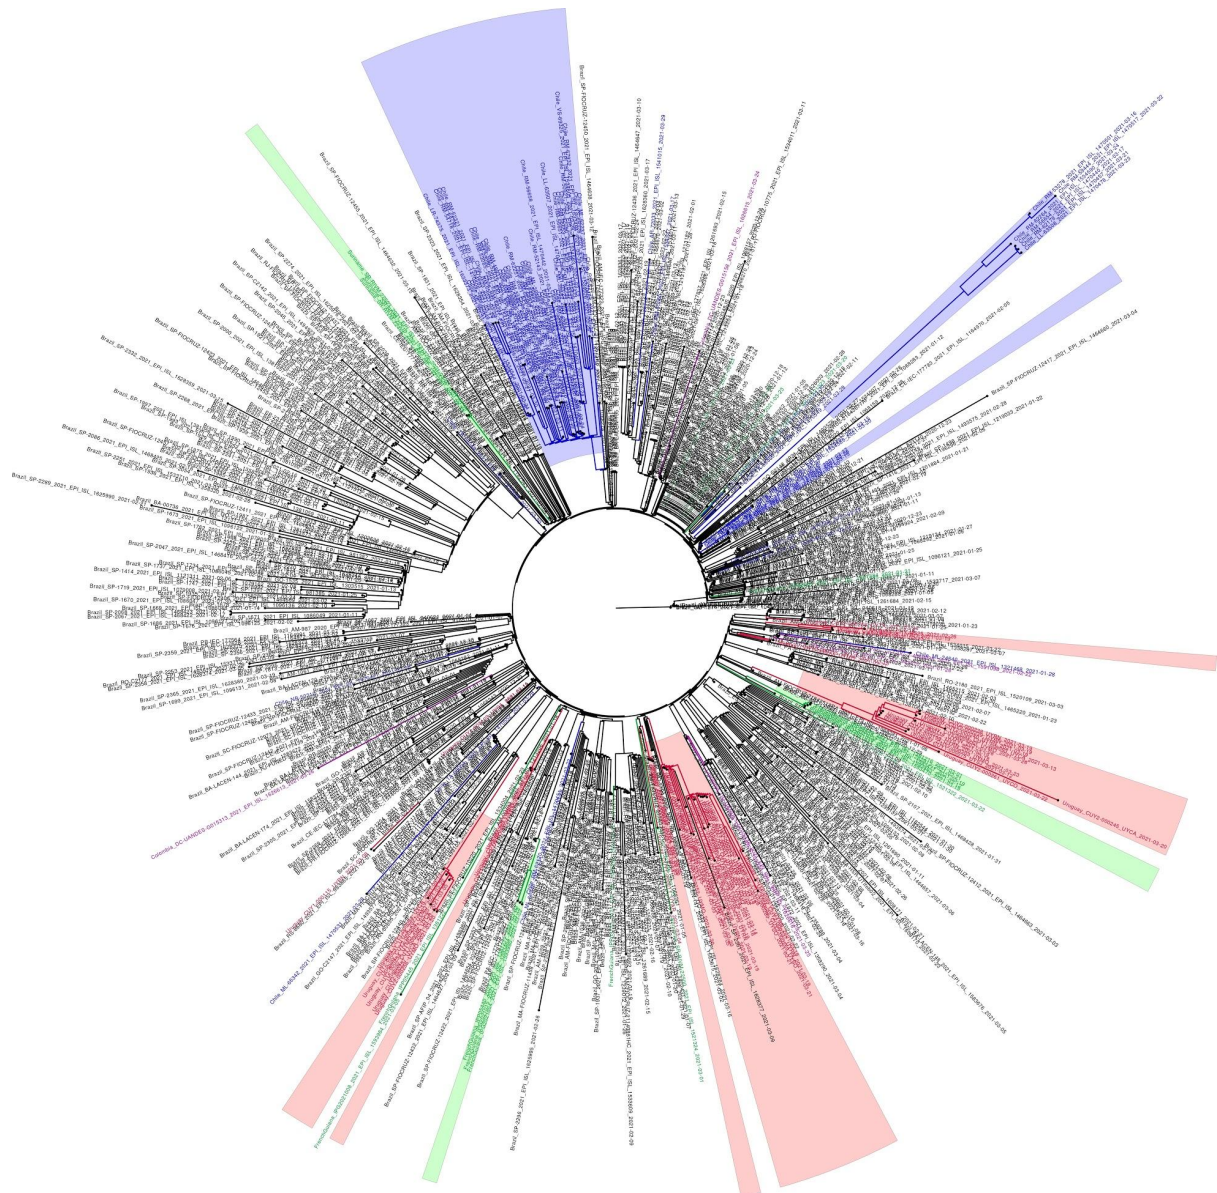

**Supplementary Figure 2.** Maximum-likelihood tree of 59 Uruguayan and 691 South American P.1 whole genome sequences. The tree was rooted with the oldest P.1 sequence (EPI\_ISL\_833137). Brazilian sequences are kept in black. Uruguayan sequences are shown in red. While six sequences are singletons, 53 sequences gather in six clades of size three to 24 (red areas). Chilean sequences and clades are shown in blue, French Guiana and Suriname sequences and clades in green. Sequences from Colombia and Peru are colored violet.

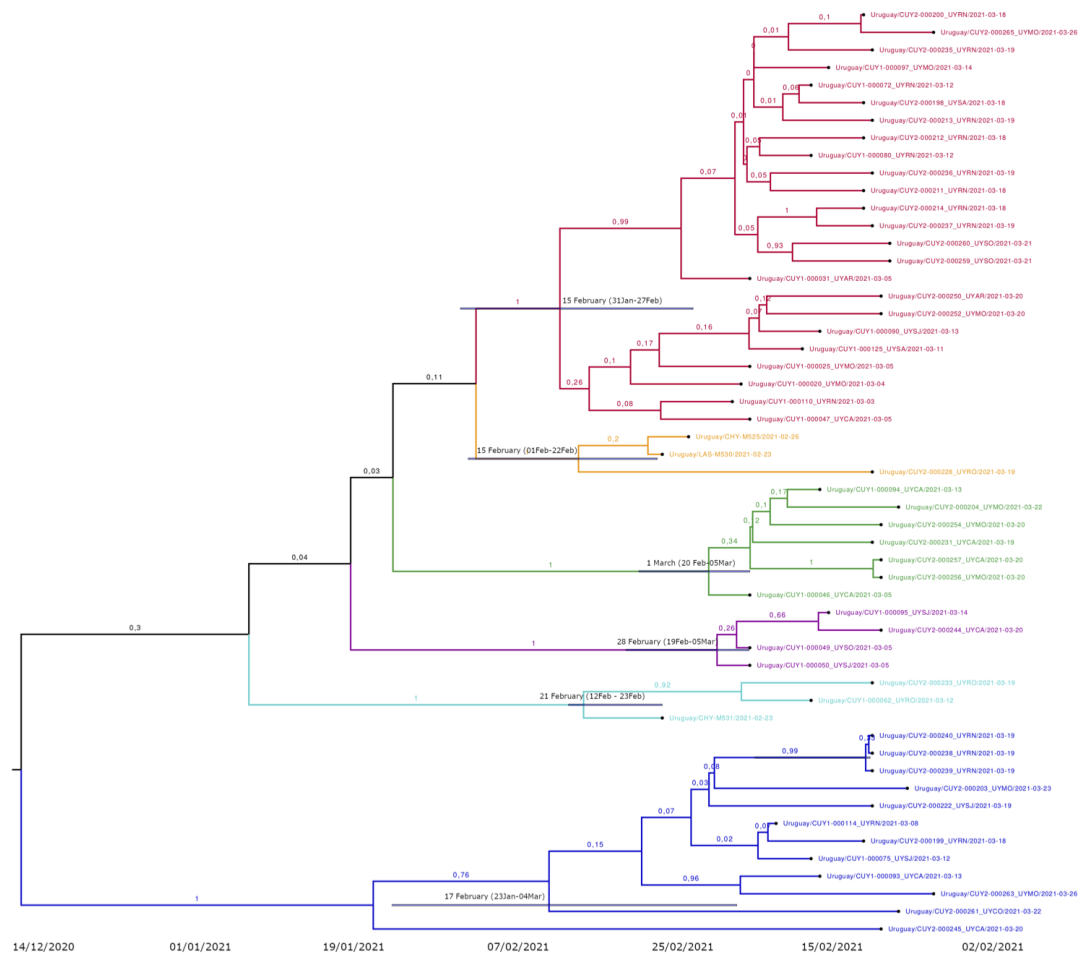

**Supplementary Figure 3.** Temporal dissemination of SARS-CoV-2 Uruguayan clades. Six Uruguayan clades inferred on the time-scaled bayesian phylogeographic MCC tree.  $T_{MRCA}$  with 95% confidence interval at ancestral nodes are shown. Clades are colored: UY-I: red, UY-II: blue, UY-III: green, UY-IV: violet, UY-V: aquamarine, UY-VI: yellow.

## **5. Supplementary GISAID Acknowledgment Table**

We gratefully acknowledge the following Authors from the Originating laboratories responsible for obtaining the specimens, as well as the Submitting laboratories where the genome data were generated and shared via GISAID, on which this research is based.

All Submitters of data may be contacted directly via [www.gisaid.org](http://www.gisaid.org)

Authors are sorted alphabetically.

| Accession ID                                                                                                                                                                                                                                                                                                                                                                                                                                                                                                                                                                                                                                                                                                                                                                                                                                                                                      | Originating Laboratory                                                                                             | Submitting Laboratory                                                                                              | Authors                                                                                                                                                                                                                                                                             |
|---------------------------------------------------------------------------------------------------------------------------------------------------------------------------------------------------------------------------------------------------------------------------------------------------------------------------------------------------------------------------------------------------------------------------------------------------------------------------------------------------------------------------------------------------------------------------------------------------------------------------------------------------------------------------------------------------------------------------------------------------------------------------------------------------------------------------------------------------------------------------------------------------|--------------------------------------------------------------------------------------------------------------------|--------------------------------------------------------------------------------------------------------------------|-------------------------------------------------------------------------------------------------------------------------------------------------------------------------------------------------------------------------------------------------------------------------------------|
| EPI_ISL_1000671, EPI_ISL_1000673                                                                                                                                                                                                                                                                                                                                                                                                                                                                                                                                                                                                                                                                                                                                                                                                                                                                  | Instituto de Biotecnologia - UNESP-Botucatu-SP                                                                     | Instituto de Biotecnologia - UNESP-Botucatu-SP                                                                     | Leila Sabrina Ullmann; Fábio Sossai Possebon, Camila Dantas Malossi, Paula Rahal, Paulo Inacio da Costa, João Pessoa Araújo Jr.                                                                                                                                                     |
| EPI_ISL_1001384, EPI_ISL_1001385                                                                                                                                                                                                                                                                                                                                                                                                                                                                                                                                                                                                                                                                                                                                                                                                                                                                  | Outre mer                                                                                                          | National Reference Center for Viruses of Respiratory Infections, Institut Pasteur, Paris                           | Marion Barbet, Sylvie Behillil, Méline Bizard, Angela Brisebarre, Camille Capel, Etienne Simon-Lorière, Vincent Enouf, Maud Vanpeene, Sylvie van der Werf, Rousset (Guy) Dominique                                                                                                  |
| EPI_ISL_1034304, EPI_ISL_1034306                                                                                                                                                                                                                                                                                                                                                                                                                                                                                                                                                                                                                                                                                                                                                                                                                                                                  | Laboratorio de Ecologia de Doencas Transmissíveis na Amazonia, Instituto Leonidas e Maria Deane - Fiocruz Amazonia | Laboratorio de Ecologia de Doencas Transmissíveis na Amazonia, Instituto Leonidas e Maria Deane - Fiocruz Amazonia | Valdinete Nascimento, Victor Souza, André Corado, Fernanda Nascimento, George Silva, Ágatha Costa, Debora Duarte, Karina Pessoa, Matilde Mejia, Luciana Gonçalves, Maria Júlia Brandão, Michele Jesus, Felipe Naveca on behalf of the Fiocruz COVID-19 Genomic Surveillance Network |
| EPI_ISL_1039691, EPI_ISL_1039692, EPI_ISL_1039693, EPI_ISL_1039694, EPI_ISL_1039695, EPI_ISL_1041509                                                                                                                                                                                                                                                                                                                                                                                                                                                                                                                                                                                                                                                                                                                                                                                              | LACEN do Estado de Goias                                                                                           | Instituto Adolfo Lutz, Interdisciplinary Procedures Center, Strategic Laboratory                                   | Claudio Tavares Sacchi, Claudia Regina Gonçalves, Erica Valessa Ramos Gomes, Karoline Rodrigues Campos                                                                                                                                                                              |
| EPI_ISL_1067728                                                                                                                                                                                                                                                                                                                                                                                                                                                                                                                                                                                                                                                                                                                                                                                                                                                                                   | Center for Biotechnology and Cell Therapy, São Rafael Hospital, Salvador, Brazil                                   | Central Public Health Laboratory - LACEN -Bahia, Salvador, Brazil                                                  | Stephane Tosta, Luciana Oliveira, Vanessa Nardy, Patrícia Cajado, Marcela Gómez, Breno Dominguez, Jaqueline Gomes, Vagner Fonseca, Marta Giovanetti, Luiz Alcantara, Felicidade Pereira, Arabela Leal                                                                               |
| EPI_ISL_1067729, EPI_ISL_1067730, EPI_ISL_1067731                                                                                                                                                                                                                                                                                                                                                                                                                                                                                                                                                                                                                                                                                                                                                                                                                                                 | Central Public Health Laboratory - LACEN -Bahia, Salvador, Brazil                                                  | Central Public Health Laboratory - LACEN -Bahia, Salvador, Brazil                                                  | Stephane Tosta, Luciana Oliveira, Vanessa Nardy, Patrícia Cajado, Marcela Gómez, Breno Dominguez, Jaqueline Gomes, Vagner Fonseca, Marta Giovanetti, Luiz Alcantara, Felicidade Pereira, Arabela Leal                                                                               |
| EPI_ISL_1067732                                                                                                                                                                                                                                                                                                                                                                                                                                                                                                                                                                                                                                                                                                                                                                                                                                                                                   | Center for Biotechnology and Cell Therapy, São Rafael Hospital, Salvador, Brazil                                   | Central Public Health Laboratory - LACEN -Bahia, Salvador, Brazil                                                  | Stephane Tosta, Luciana Oliveira, Vanessa Nardy, Patrícia Cajado, Marcela Gómez, Breno Dominguez, Jaqueline Gomes, Vagner Fonseca, Marta Giovanetti, Luiz Alcantara, Felicidade Pereira, Arabela Leal                                                                               |
| EPI_ISL_1067733, EPI_ISL_1067734, EPI_ISL_1067735                                                                                                                                                                                                                                                                                                                                                                                                                                                                                                                                                                                                                                                                                                                                                                                                                                                 | Central Public Health Laboratory - LACEN -Bahia, Salvador, Brazil                                                  | Central Public Health Laboratory - LACEN -Bahia, Salvador, Brazil                                                  | Stephane Tosta, Luciana Oliveira, Vanessa Nardy, Patrícia Cajado, Marcela Gómez, Breno Dominguez, Jaqueline Gomes, Vagner Fonseca, Marta Giovanetti, Luiz Alcantara, Felicidade Pereira, Arabela Leal                                                                               |
| EPI_ISL_1067736                                                                                                                                                                                                                                                                                                                                                                                                                                                                                                                                                                                                                                                                                                                                                                                                                                                                                   | Center for Biotechnology and Cell Therapy, São Rafael Hospital, Salvador, Brazil                                   | Central Public Health Laboratory - LACEN -Bahia, Salvador, Brazil                                                  | Stephane Tosta, Luciana Oliveira, Vanessa Nardy, Patrícia Cajado, Marcela Gómez, Breno Dominguez, Jaqueline Gomes, Vagner Fonseca, Marta Giovanetti, Luiz Alcantara, Felicidade Pereira, Arabela Leal                                                                               |
| EPI_ISL_1067737, EPI_ISL_1067738                                                                                                                                                                                                                                                                                                                                                                                                                                                                                                                                                                                                                                                                                                                                                                                                                                                                  | Central Public Health Laboratory - LACEN -Bahia, Salvador, Brazil                                                  | Central Public Health Laboratory - LACEN -Bahia, Salvador, Brazil                                                  | Stephane Tosta, Luciana Oliveira, Vanessa Nardy, Patrícia Cajado, Marcela Gómez, Breno Dominguez, Jaqueline Gomes, Vagner Fonseca, Marta Giovanetti, Luiz Alcantara, Felicidade Pereira, Arabela Leal                                                                               |
| EPI_ISL_1068110, EPI_ISL_1068111, EPI_ISL_1068112, EPI_ISL_1068114, EPI_ISL_1068149, EPI_ISL_1068150, EPI_ISL_1068151, EPI_ISL_1068154, EPI_ISL_1068156, EPI_ISL_1068157, EPI_ISL_1068158, EPI_ISL_1068159, EPI_ISL_1068160, EPI_ISL_1068169, EPI_ISL_1068198, EPI_ISL_1068221, EPI_ISL_1068222, EPI_ISL_1068225, EPI_ISL_1068226, EPI_ISL_1068243, EPI_ISL_1068248, EPI_ISL_1068249, EPI_ISL_1068258, EPI_ISL_1068260, EPI_ISL_1068261, EPI_ISL_1068262, EPI_ISL_1068263, EPI_ISL_1068264, EPI_ISL_1068266, EPI_ISL_1068268, EPI_ISL_1068269, EPI_ISL_1068270, EPI_ISL_1068271, EPI_ISL_1068272, EPI_ISL_1068273, EPI_ISL_1068274, EPI_ISL_1068275, EPI_ISL_1068276, EPI_ISL_1068278, EPI_ISL_1068279, EPI_ISL_1068280, EPI_ISL_1068281, EPI_ISL_1068282, EPI_ISL_1068283, EPI_ISL_1068284, EPI_ISL_1068285, EPI_ISL_1068286, EPI_ISL_1068287, EPI_ISL_1068288, EPI_ISL_1068289, EPI_ISL_1068290 | Laboratorio de Ecologia de Doencas Transmissíveis na Amazonia, Instituto Leonidas e Maria Deane - Fiocruz Amazonia | Laboratorio de Ecologia de Doencas Transmissíveis na Amazonia, Instituto Leonidas e Maria Deane - Fiocruz Amazonia | Valdinete Nascimento, Victor Souza, André Corado, Fernanda Nascimento, George Silva, Ágatha Costa, Debora Duarte, Karina Pessoa, Matilde Mejia, Luciana Gonçalves, Maria Júlia Brandão, Michele Jesus, Felipe Naveca on behalf of the Fiocruz COVID-19 Genomic Surveillance Network |
| see above                                                                                                                                                                                                                                                                                                                                                                                                                                                                                                                                                                                                                                                                                                                                                                                                                                                                                         | Laboratorio de Ecologia de Doencas Transmissíveis na Amazonia, Instituto Leonidas e Maria Deane - Fiocruz Amazonia | Laboratorio de Ecologia de Doencas Transmissíveis na Amazonia, Instituto Leonidas e Maria Deane - Fiocruz Amazonia | Valdinete Nascimento, Victor Souza, André Corado, Fernanda Nascimento, George Silva, Ágatha Costa, Debora Duarte, Karina Pessoa, Matilde Mejia, Luciana Gonçalves, Maria Júlia Brandão, Michele Jesus, Felipe Naveca on behalf of the Fiocruz COVID-19 Genomic Surveillance Network |
| EPI_ISL_1078992, EPI_ISL_1079002, EPI_ISL_1079008, EPI_ISL_1079162                                                                                                                                                                                                                                                                                                                                                                                                                                                                                                                                                                                                                                                                                                                                                                                                                                | IAL Regional de Bauru                                                                                              | Instituto Adolfo Lutz, Interdisciplinary Procedures Center, Strategic Laboratory                                   | Claudio Tavares Sacchi, Claudia Regina Gonçalves, Erica Valessa Ramos Gomes, Karoline Rodrigues Campos                                                                                                                                                                              |
| EPI_ISL_1086034                                                                                                                                                                                                                                                                                                                                                                                                                                                                                                                                                                                                                                                                                                                                                                                                                                                                                   | Diagnosticos da America - DASA                                                                                     | Instituto Adolfo Lutz, Interdisciplinary Procedures Center, Strategic Laboratory                                   | Claudio Tavares Sacchi, Claudia Regina Gonçalves, Erica Valessa Ramos Gomes, Karoline Rodrigues Campos, Caio Vinicius Dias Lopes                                                                                                                                                    |
| EPI_ISL_1086035, EPI_ISL_1086036                                                                                                                                                                                                                                                                                                                                                                                                                                                                                                                                                                                                                                                                                                                                                                                                                                                                  | IAL Regional de Bauru                                                                                              | Instituto Adolfo Lutz, Interdisciplinary Procedures Center, Strategic Laboratory                                   | Claudio Tavares Sacchi, Claudia Regina Gonçalves, Erica Valessa Ramos Gomes, Karoline Rodrigues Campos, Caio Vinicius Dias Lopes                                                                                                                                                    |
| EPI_ISL_1086037, EPI_ISL_1086038, EPI_ISL_1086039, EPI_ISL_1086040, EPI_ISL_1086041, EPI_ISL_1086042, EPI_ISL_1086043                                                                                                                                                                                                                                                                                                                                                                                                                                                                                                                                                                                                                                                                                                                                                                             | Diagnosticos da America - DASA                                                                                     | Instituto Adolfo Lutz, Interdisciplinary Procedures Center, Strategic Laboratory                                   | Claudio Tavares Sacchi, Claudia Regina Gonçalves, Erica Valessa Ramos Gomes, Karoline Rodrigues Campos, Caio Vinicius Dias Lopes                                                                                                                                                    |
| EPI_ISL_1086044, EPI_ISL_1086045, EPI_ISL_1086046, EPI_ISL_1086047, EPI_ISL_1086048, EPI_ISL_1086049, EPI_ISL_1096120                                                                                                                                                                                                                                                                                                                                                                                                                                                                                                                                                                                                                                                                                                                                                                             | IAL Regional de Bauru                                                                                              | Instituto Adolfo Lutz, Interdisciplinary Procedures Center, Strategic Laboratory                                   | Claudio Tavares Sacchi, Claudia Regina Gonçalves, Erica Valessa Ramos Gomes, Karoline Rodrigues Campos, Caio Vinicius Dias Lopes                                                                                                                                                    |
| EPI_ISL_1096121                                                                                                                                                                                                                                                                                                                                                                                                                                                                                                                                                                                                                                                                                                                                                                                                                                                                                   | Diagnosticos da America - DASA                                                                                     | Instituto Adolfo Lutz, Interdisciplinary Procedures Center, Strategic Laboratory                                   | Claudio Tavares Sacchi, Claudia Regina Gonçalves, Erica Valessa Ramos Gomes, Karoline Rodrigues Campos, Caio Vinicius Dias Lopes                                                                                                                                                    |
| EPI_ISL_1096122, EPI_ISL_1096124, EPI_ISL_1096125, EPI_ISL_1096127, EPI_ISL_1096131, EPI_ISL_1096132, EPI_ISL_1096134                                                                                                                                                                                                                                                                                                                                                                                                                                                                                                                                                                                                                                                                                                                                                                             | IAL Regional de Bauru                                                                                              | Instituto Adolfo Lutz, Interdisciplinary Procedures Center, Strategic Laboratory                                   | Claudio Tavares Sacchi, Claudia Regina Gonçalves, Erica Valessa Ramos Gomes, Karoline Rodrigues Campos, Caio Vinicius Dias Lopes                                                                                                                                                    |
| EPI_ISL_1096135                                                                                                                                                                                                                                                                                                                                                                                                                                                                                                                                                                                                                                                                                                                                                                                                                                                                                   | Diagnosticos da America - DASA                                                                                     | Instituto Adolfo Lutz, Interdisciplinary Procedures Center, Strategic Laboratory                                   | Claudio Tavares Sacchi, Claudia Regina Gonçalves, Erica Valessa Ramos Gomes, Karoline Rodrigues Campos, Caio Vinicius Dias Lopes                                                                                                                                                    |
| EPI_ISL_1096136                                                                                                                                                                                                                                                                                                                                                                                                                                                                                                                                                                                                                                                                                                                                                                                                                                                                                   | IAL Regional de Bauru                                                                                              | Instituto Adolfo Lutz, Interdisciplinary Procedures Center, Strategic Laboratory                                   | Claudio Tavares Sacchi, Claudia Regina Gonçalves, Erica Valessa Ramos Gomes, Karoline Rodrigues Campos, Caio Vinicius Dias Lopes                                                                                                                                                    |
| EPI_ISL_1096262                                                                                                                                                                                                                                                                                                                                                                                                                                                                                                                                                                                                                                                                                                                                                                                                                                                                                   | Outre mer                                                                                                          | National Reference Center for Viruses of Respiratory Infections, Institut Pasteur, Paris                           | Marion Barbet, Sylvie Behillil, Méline Bizard, Angela Brisebarre, Camille Capel, Etienne Simon-Lorière, Vincent Enouf, Maud Vanpeene, Sylvie van der Werf, Rousset Dominique                                                                                                        |
| EPI_ISL_1111137, EPI_ISL_1111143, EPI_ISL_1111151, EPI_ISL_1111152, EPI_ISL_1111160, EPI_ISL_1111281, EPI_ISL_1111483, EPI_ISL_1111484, EPI_ISL_1111486, EPI_ISL_1111490, EPI_ISL_1111496                                                                                                                                                                                                                                                                                                                                                                                                                                                                                                                                                                                                                                                                                                         | Laboratorio de Referencia Nacional de Virus Respiratorio. Instituto Nacional de Salud Perú                         | Laboratorio de Referencia Nacional de Enteropatógenos. Instituto Nacional de Salud del Perú                        | Ronnie Gavilan Chavez, Junior Caro Castro, Willi Quino Sifuentes, Veronica Hurtado Vela, Iris Silva Molina, Fiorella Orellana Peralta                                                                                                                                               |
| EPI_ISL_1121307                                                                                                                                                                                                                                                                                                                                                                                                                                                                                                                                                                                                                                                                                                                                                                                                                                                                                   | Hospital E Antonio Policarpo de Oliveira                                                                           | Instituto Adolfo Lutz, Interdisciplinary Procedures Center, Strategic Laboratory                                   | Claudio Tavares Sacchi, Claudia Regina Gonçalves, Erica Valessa Ramos Gomes, Karoline Rodrigues Campos, Caio Vinicius Dias Lopes                                                                                                                                                    |
| EPI_ISL_1121308                                                                                                                                                                                                                                                                                                                                                                                                                                                                                                                                                                                                                                                                                                                                                                                                                                                                                   | Hospital e Pronto Socorro Portinari                                                                                | Instituto Adolfo Lutz, Interdisciplinary Procedures Center, Strategic Laboratory                                   | Claudio Tavares Sacchi, Claudia Regina Gonçalves, Erica Valessa Ramos Gomes, Karoline Rodrigues Campos, Caio Vinicius Dias Lopes                                                                                                                                                    |

|                                                                                                                                                         |                                                                     |                                                                                  |                                                                                                                                                                                                                                                                                                                                                                                                                                                                                                                                                                          |
|---------------------------------------------------------------------------------------------------------------------------------------------------------|---------------------------------------------------------------------|----------------------------------------------------------------------------------|--------------------------------------------------------------------------------------------------------------------------------------------------------------------------------------------------------------------------------------------------------------------------------------------------------------------------------------------------------------------------------------------------------------------------------------------------------------------------------------------------------------------------------------------------------------------------|
| EPI_ISL_1121309                                                                                                                                         | UBS Jose Francisco Rezende                                          | Instituto Adolfo Lutz, Interdisciplinary Procedures Center, Strategic Laboratory | Claudio Tavares Sacchi, Claudia Regina Gonçalves, Erica Valessa Ramos Gomes, Karoline Rodrigues Campos, Caio Vinicius Dias Lopes                                                                                                                                                                                                                                                                                                                                                                                                                                         |
| EPI_ISL_1121310                                                                                                                                         | IAL Regional de Bauru                                               | Instituto Adolfo Lutz, Interdisciplinary Procedures Center, Strategic Laboratory | Claudio Tavares Sacchi, Claudia Regina Gonçalves, Erica Valessa Ramos Gomes, Karoline Rodrigues Campos, Caio Vinicius Dias Lopes                                                                                                                                                                                                                                                                                                                                                                                                                                         |
| EPI_ISL_1121311                                                                                                                                         | Centro de Saude II Dr. Jose Paione Mococa                           | Instituto Adolfo Lutz, Interdisciplinary Procedures Center, Strategic Laboratory | Claudio Tavares Sacchi, Claudia Regina Gonçalves, Erica Valessa Ramos Gomes, Karoline Rodrigues Campos, Caio Vinicius Dias Lopes                                                                                                                                                                                                                                                                                                                                                                                                                                         |
| EPI_ISL_1121312, EPI_ISL_1121313, EPI_ISL_1121314, EPI_ISL_1121315                                                                                      | IAL Regional de Bauru                                               | Instituto Adolfo Lutz, Interdisciplinary Procedures Center, Strategic Laboratory | Claudio Tavares Sacchi, Claudia Regina Gonçalves, Erica Valessa Ramos Gomes, Karoline Rodrigues Campos, Caio Vinicius Dias Lopes                                                                                                                                                                                                                                                                                                                                                                                                                                         |
| EPI_ISL_1121316                                                                                                                                         | LACEN do Rio Grande do Sul                                          | Instituto Adolfo Lutz, Interdisciplinary Procedures Center, Strategic Laboratory | Claudio Tavares Sacchi, Claudia Regina Gonçalves, Erica Valessa Ramos Gomes, Karoline Rodrigues Campos, Caio Vinicius Dias Lopes                                                                                                                                                                                                                                                                                                                                                                                                                                         |
| EPI_ISL_1123373                                                                                                                                         | Grupo Tecnico de Vigilancia Sanitaria e Epidemiologica              | Instituto Adolfo Lutz, Interdisciplinary Procedures Center, Strategic Laboratory | Claudio Tavares Sacchi, Claudia Regina Gonçalves, Erica Valessa Ramos Gomes, Karoline Rodrigues Campos, Caio Vinicius Dias Lopes                                                                                                                                                                                                                                                                                                                                                                                                                                         |
| EPI_ISL_1139070                                                                                                                                         | IAL Regional de Ribeirao Preto                                      | Instituto Adolfo Lutz, Interdisciplinary Procedures Center, Strategic Laboratory | Claudio Tavares Sacchi, Claudia Regina Gonçalves, Erica Valessa Ramos Gomes, Karoline Rodrigues Campos, Caio Vinicius Dias Lopes                                                                                                                                                                                                                                                                                                                                                                                                                                         |
| EPI_ISL_1164970, EPI_ISL_1164971                                                                                                                        | LACEN - Laboratório Central de Saúde Pública do Ceará               | Evandro Chagas Institute                                                         | Santos, M.C.; Silva, A.M.; Junior, W.D.C.; Barbagelata, L.S.; Ferreira, J.A.; Sousa, E.M.A.; da Silva, P.S.; Pinheiro, K.C.; L.C.; Sousa Junior, E.C.                                                                                                                                                                                                                                                                                                                                                                                                                    |
| EPI_ISL_1164972                                                                                                                                         | LACEN - Laboratório Central de Saúde Pública do Pará                | Evandro Chagas Institute                                                         | Santos, M.C.; Silva, A.M.; Junior, W.D.C.; Barbagelata, L.S.; Ferreira, J.A.; Sousa, E.M.A.; da Silva, P.S.; Pinheiro, K.C.; L.C.; Sousa Junior, E.C.                                                                                                                                                                                                                                                                                                                                                                                                                    |
| EPI_ISL_1164973                                                                                                                                         | LACEN - Laboratório Central de Saúde Pública do Ceará               | Evandro Chagas Institute                                                         | Santos, M.C.; Silva, A.M.; Junior, W.D.C.; Barbagelata, L.S.; Ferreira, J.A.; Sousa, E.M.A.; da Silva, P.S.; Pinheiro, K.C.; L.C.; Sousa Junior, E.C.                                                                                                                                                                                                                                                                                                                                                                                                                    |
| EPI_ISL_1164978                                                                                                                                         | LACEN - Laboratório Central de Saúde Pública do Pará                | Evandro Chagas Institute                                                         | Santos, M.C.; Silva, A.M.; Junior, W.D.C.; Barbagelata, L.S.; Ferreira, J.A.; Sousa, E.M.A.; da Silva, P.S.; Pinheiro, K.C.; L.C.; Sousa Junior, E.C.                                                                                                                                                                                                                                                                                                                                                                                                                    |
| EPI_ISL_1164980                                                                                                                                         | LACEN - Laboratório Central de Saúde Pública do Ceará               | Evandro Chagas Institute                                                         | Santos, M.C.; Silva, A.M.; Junior, W.D.C.; Barbagelata, L.S.; Ferreira, J.A.; Sousa, E.M.A.; da Silva, P.S.; Pinheiro, K.C.; L.C.; Sousa Junior, E.C.                                                                                                                                                                                                                                                                                                                                                                                                                    |
| EPI_ISL_1164984                                                                                                                                         | LACEN - Laboratório Central de Saúde Pública do Amapá               | Evandro Chagas Institute                                                         | Santos, M.C.; Silva, A.M.; Junior, W.D.C.; Barbagelata, L.S.; Ferreira, J.A.; Sousa, E.M.A.; da Silva, P.S.; Pinheiro, K.C.; L.C.; Sousa Junior, E.C.                                                                                                                                                                                                                                                                                                                                                                                                                    |
| EPI_ISL_1164991                                                                                                                                         | LACEN - Laboratório Central de Saúde Pública do Paraíba             | Evandro Chagas Institute                                                         | Santos, M.C.; Silva, A.M.; Junior, W.D.C.; Barbagelata, L.S.; Ferreira, J.A.; Sousa, E.M.A.; da Silva, P.S.; Pinheiro, K.C.; L.C.; Sousa Junior, E.C.                                                                                                                                                                                                                                                                                                                                                                                                                    |
| EPI_ISL_1165565                                                                                                                                         | Dutch COVID-19 response team                                        | National Institute for Public Health and the Environment (RIVM)                  | Adam Meijer, Harry Vennema, Dirk Eggink, Jeroen Cremer, Sharon van den Brink, Bas van der Veer, AnneMarie van den Brandt, Florian Zwagemaker, Dennis Schmitz, Chantal Reusken, on behalf of the national COVID-19 response team                                                                                                                                                                                                                                                                                                                                          |
| EPI_ISL_1166615                                                                                                                                         | LACEN - Laboratório Central de Saúde Pública do Rio Grande do Norte | Evandro Chagas Institute Virology                                                | Santos, M.C.; Silva, A.M.; Junior, W.D.C.; Barbagelata, L.S.; Ferreira, J.A.; Sousa, E.M.A.; da Silva, P.S.; Pinheiro, K.C.; L.C.; Sousa Junior, E.C.                                                                                                                                                                                                                                                                                                                                                                                                                    |
| EPI_ISL_1171619                                                                                                                                         | IAL Regional de Presidente Prudente                                 | Instituto Adolfo Lutz, Interdisciplinary Procedures Center, Strategic Laboratory | Claudio Tavares Sacchi, Claudia Regina Gonçalves, Erica Valessa Ramos Gomes, Karoline Rodrigues Campos                                                                                                                                                                                                                                                                                                                                                                                                                                                                   |
| EPI_ISL_1171648, EPI_ISL_1171649, EPI_ISL_1171650                                                                                                       | Centro de Saude Dr. Jose Paione em Mococa                           | Instituto Adolfo Lutz, Interdisciplinary Procedures Center, Strategic Laboratory | Claudio Tavares Sacchi, Claudia Regina Gonçalves, Erica Valessa Ramos Gomes, Karoline Rodrigues Campos, Caio Vinicius Dias Lopes                                                                                                                                                                                                                                                                                                                                                                                                                                         |
| EPI_ISL_1171653, EPI_ISL_1171656, EPI_ISL_1171657, EPI_ISL_1171658, EPI_ISL_1171666, EPI_ISL_1171672, EPI_ISL_1171674                                   | IAL Regional de Presidente Prudente                                 | Instituto Adolfo Lutz, Interdisciplinary Procedures Center, Strategic Laboratory | Claudio Tavares Sacchi, Claudia Regina Gonçalves, Erica Valessa Ramos Gomes, Karoline Rodrigues Campos, Caio Vinicius Dias Lopes                                                                                                                                                                                                                                                                                                                                                                                                                                         |
| EPI_ISL_1182543, EPI_ISL_1182544, EPI_ISL_1182545                                                                                                       | Fundação Ezequiel Dias (FUNED)                                      | Coordenação Geral de Laboratórios de Saúde Pública (CGLAB/DAEVS/SVS/MS)          | Vagner Fonseca, et al.                                                                                                                                                                                                                                                                                                                                                                                                                                                                                                                                                   |
| EPI_ISL_1196296                                                                                                                                         | Centro de Saude II Dr. Jose Paione Mococa                           | Instituto Adolfo Lutz, Interdisciplinary Procedures Center, Strategic Laboratory | Claudio Tavares Sacchi, Claudia Regina Gonçalves, Erica Valessa Ramos Gomes, Karoline Rodrigues Campos, Caio Vinicius Dias Lopes                                                                                                                                                                                                                                                                                                                                                                                                                                         |
| EPI_ISL_1196299                                                                                                                                         | IAL Regional de Marília                                             | Instituto Adolfo Lutz, Interdisciplinary Procedures Center, Strategic Laboratory | Claudio Tavares Sacchi, Claudia Regina Gonçalves, Erica Valessa Ramos Gomes, Karoline Rodrigues Campos, Caio Vinicius Dias Lopes                                                                                                                                                                                                                                                                                                                                                                                                                                         |
| EPI_ISL_1201884                                                                                                                                         | Aeroporto Internacional de Guarulhos                                | Instituto Adolfo Lutz, Interdisciplinary Procedures Center, Strategic Laboratory | Claudio Tavares Sacchi, Claudia Regina Gonçalves, Erica Valessa Ramos Gomes, Karoline Rodrigues Campos, Caio Vinicius Dias Lopes                                                                                                                                                                                                                                                                                                                                                                                                                                         |
| EPI_ISL_1201893                                                                                                                                         | IAL Regional de Sorocaba                                            | Instituto Adolfo Lutz, Interdisciplinary Procedures Center, Strategic Laboratory | Claudio Tavares Sacchi, Claudia Regina Gonçalves, Erica Valessa Ramos Gomes, Karoline Rodrigues Campos, Caio Vinicius Dias Lopes                                                                                                                                                                                                                                                                                                                                                                                                                                         |
| EPI_ISL_1213168, EPI_ISL_1213170                                                                                                                        | LAFEM/UESC                                                          | Bioinformatics Laboratory / LNCC                                                 | Alessandra P Lamarca, Luiz G P de Almeida, Ronaldo da Silva Francisco Jr, Lucymara Fassarella Agnez Lima, Kátia Castanho Scoretcci, Vinicius Pietta Perez, Otavio J. Brustolini, Eduardo Sérgio Soares Sousa, Danielle Angst Secco, Angela Maria Guimarães Santos, George Rego Albuquerque, Ana Paula Melo Mariano, Bianca Mendes Maciel, Alexandra L Gerber, Ana Paula de C Guimarães, Paulo Ricardo Nascimento, Francisco Paulo Freire Neto, Sandra Rocha Gadelha, Luis Cristóvão Porto, Eloiza Helena Campana, Selma Maria Bezerra Jeronimo, Ana Tereza R Vasconcelos |
| EPI_ISL_1213171                                                                                                                                         | Laboratório HLA/UERJ                                                | Bioinformatics Laboratory / LNCC                                                 | Alessandra P Lamarca, Luiz G P de Almeida, Ronaldo da Silva Francisco Jr, Lucymara Fassarella Agnez Lima, Kátia Castanho Scoretcci, Vinicius Pietta Perez, Otavio J. Brustolini, Eduardo Sérgio Soares Sousa, Danielle Angst Secco, Angela Maria Guimarães Santos, George Rego Albuquerque, Ana Paula Melo Mariano, Bianca Mendes Maciel, Alexandra L Gerber, Ana Paula de C Guimarães, Paulo Ricardo Nascimento, Francisco Paulo Freire Neto, Sandra Rocha Gadelha, Luis Cristóvão Porto, Eloiza Helena Campana, Selma Maria Bezerra Jeronimo, Ana Tereza R Vasconcelos |
| EPI_ISL_1213173, EPI_ISL_1213175, EPI_ISL_1213177, EPI_ISL_1213178, EPI_ISL_1213180, EPI_ISL_1213182, EPI_ISL_1213183, EPI_ISL_1213185, EPI_ISL_1213187 | IMT-UFRN/RN                                                         | Bioinformatics Laboratory / LNCC                                                 | Alessandra P Lamarca, Luiz G P de Almeida, Ronaldo da Silva Francisco Jr, Lucymara Fassarella Agnez Lima, Kátia Castanho Scoretcci, Vinicius Pietta Perez, Otavio J. Brustolini, Eduardo Sérgio Soares Sousa, Danielle Angst Secco, Angela Maria Guimarães Santos, George Rego Albuquerque, Ana Paula Melo Mariano, Bianca Mendes Maciel, Alexandra L Gerber, Ana Paula de C Guimarães, Paulo Ricardo Nascimento, Francisco Paulo Freire Neto, Sandra Rocha Gadelha, Luis Cristóvão Porto, Eloiza Helena Campana, Selma Maria Bezerra Jeronimo, Ana Tereza R Vasconcelos |
| EPI_ISL_1213189, EPI_ISL_1213190                                                                                                                        | LBM/UFPB                                                            | Bioinformatics Laboratory / LNCC                                                 | Alessandra P Lamarca, Luiz G P de Almeida, Ronaldo da Silva Francisco Jr, Lucymara Fassarella Agnez Lima, Kátia Castanho Scoretcci, Vinicius Pietta Perez, Otavio J. Brustolini, Eduardo Sérgio Soares Sousa, Danielle Angst Secco, Angela Maria Guimarães Santos, George Rego Albuquerque, Ana Paula Melo Mariano, Bianca Mendes Maciel, Alexandra L Gerber, Ana Paula de C Guimarães, Paulo Ricardo Nascimento, Francisco Paulo Freire Neto, Sandra Rocha Gadelha, Luis Cristóvão Porto, Eloiza Helena Campana, Selma Maria Bezerra Jeronimo, Ana Tereza R Vasconcelos |
| EPI_ISL_1213192, EPI_ISL_1213194, EPI_ISL_1213196, EPI_ISL_1213197, EPI_ISL_1213199                                                                     | IMT-UFRN/RN                                                         | Bioinformatics Laboratory / LNCC                                                 | Alessandra P Lamarca, Luiz G P de Almeida, Ronaldo da Silva Francisco Jr, Lucymara Fassarella Agnez Lima, Kátia Castanho Scoretcci, Vinicius Pietta Perez, Otavio J. Brustolini, Eduardo Sérgio Soares Sousa, Danielle Angst Secco, Angela Maria Guimarães Santos, George Rego Albuquerque, Ana Paula Melo Mariano, Bianca Mendes Maciel, Alexandra L Gerber, Ana Paula de C Guimarães, Paulo Ricardo Nascimento, Francisco Paulo Freire Neto, Sandra Rocha Gadelha, Luis Cristóvão Porto, Eloiza Helena Campana, Selma Maria Bezerra Jeronimo, Ana Tereza R Vasconcelos |
| EPI_ISL_1213201, EPI_ISL_1213202, EPI_ISL_1213204, EPI_ISL_1213206, EPI_ISL_1213207                                                                     | LBM/UFPB                                                            | Bioinformatics Laboratory / LNCC                                                 | Alessandra P Lamarca, Luiz G P de Almeida, Ronaldo da Silva Francisco Jr, Lucymara Fassarella Agnez Lima, Kátia Castanho Scoretcci, Vinicius Pietta Perez, Otavio J. Brustolini, Eduardo Sérgio Soares Sousa, Danielle Angst Secco, Angela Maria Guimarães Santos, George Rego Albuquerque, Ana Paula Melo Mariano, Bianca Mendes Maciel, Alexandra L Gerber, Ana Paula de C Guimarães, Paulo Ricardo Nascimento, Francisco Paulo Freire Neto, Sandra Rocha Gadelha, Luis Cristóvão Porto, Eloiza Helena Campana, Selma Maria Bezerra Jeronimo, Ana Tereza R Vasconcelos |
| EPI_ISL_1219021                                                                                                                                         | Hospital Avicena                                                    | Instituto Adolfo Lutz, Interdisciplinary Procedures Center, Strategic Laboratory | Claudio Tavares Sacchi, Claudia Regina Gonçalves, Erica Valessa Ramos Gomes, Karoline Rodrigues Campos, Caio Vinicius Dias Lopes                                                                                                                                                                                                                                                                                                                                                                                                                                         |
| EPI_ISL_1219025                                                                                                                                         | IAL Regional de Sorocaba                                            | Instituto Adolfo Lutz, Interdisciplinary Procedures Center, Strategic Laboratory | Claudio Tavares Sacchi, Claudia Regina Gonçalves, Erica Valessa Ramos Gomes, Karoline Rodrigues Campos, Caio Vinicius Dias Lopes                                                                                                                                                                                                                                                                                                                                                                                                                                         |



|                                                                                                      |                                                                                                                 |                                                                                                                    |                                                                                                                                                                                                                                                                                                                                                                                                       |
|------------------------------------------------------------------------------------------------------|-----------------------------------------------------------------------------------------------------------------|--------------------------------------------------------------------------------------------------------------------|-------------------------------------------------------------------------------------------------------------------------------------------------------------------------------------------------------------------------------------------------------------------------------------------------------------------------------------------------------------------------------------------------------|
| EPI_ISL_1219029, EPI_ISL_1219030, EPI_ISL_1219033, EPI_ISL_1219036                                   | Aeroporto Internacional de Guarulhos                                                                            | Instituto Adolfo Lutz, Interdisciplinary Procedures Center, Strategic Laboratory                                   | Claudio Tavares Sacchi, Claudia Regina Gonçalves, Erica Valessa Ramos Gomes, Karoline Rodrigues Campos, Caio Vinicius Dias Lopes                                                                                                                                                                                                                                                                      |
| EPI_ISL_1219133                                                                                      | Laboratório Central de Saúde Pública do Estado do Paraná (LACEN-PR)                                             | Laboratory of Respiratory Viruses and Measles, Oswaldo Cruz Institute, FIOCRUZ                                     | Paola Resende, Luciana Apolinario, Fernando Motta, Anna Carolina Paixao, Ana Carolina Mendonca, Alice Sampaio Rocha, Renata Serrano Lopes, Maria do Carmo Debur, Irina Nastassja Riediger, Marilda Siqueira on behalf of the Fiocruz COVID-19 Genomic Surveillance Network                                                                                                                            |
| EPI_ISL_1219134, EPI_ISL_1219135                                                                     | Laboratório Central de Saúde Pública do Estado do Alagoas (LACEN-AL)                                            | Laboratory of Respiratory Viruses and Measles, Oswaldo Cruz Institute, FIOCRUZ                                     | Paola Resende, Luciana Apolinario, Fernando Motta, Anna Carolina Paixao, Ana Carolina Mendonca, Alice Sampaio Rocha, Renata Serrano Lopes, Anderson Brandao Leite, Marilda Siqueira on behalf of the Fiocruz COVID-19 Genomic Surveillance Network                                                                                                                                                    |
| EPI_ISL_1219136                                                                                      | Gonçalo Moniz Institute, FIOCRUZ, Bahia                                                                         | Laboratory of Respiratory Viruses and Measles, Oswaldo Cruz Institute, FIOCRUZ                                     | Paola Resende, Luciana Apolinario, Fernando Motta, Anna Carolina Paixao, Ana Carolina Mendonca, Alice Sampaio Rocha, Renata Serrano Lopes, Tiago Graf, Ricardo Khouri, Marilda Siqueira on behalf of the Fiocruz COVID-19 Genomic Surveillance Network                                                                                                                                                |
| EPI_ISL_1239012                                                                                      | Laboratório Central de Saúde Pública do Estado de Pernambuco (LACEN-PE)                                         | WallauLab, Aggeu Magalhaes Institute                                                                               | Marcelo Henrique dos Santos Paiva, Duschinka Ribeiro Duarte Guedes, Cássia Docena, Matheus Filgueira Bezerra, Filipe Zimmer Dezordi, Laís Ceschini Machado, Larissa Krokovsky, Elisama Helvecio, Alexandre Freitas da Silva, Antonio Mauro Rezende, Sivalva Pinto Brandão Filho, Constância Flávia Junqueira Ayres, Gabriel Luz Wallau on behalf of the Fiocruz COVID-19 Genomic Surveillance Network |
| EPI_ISL_1239111                                                                                      | Laboratório Central de Saúde Pública Noel Nutels                                                                | Coordenação Geral de Laboratórios de Saúde Pública (CGLAB)                                                         | Vagner Fonseca et al,                                                                                                                                                                                                                                                                                                                                                                                 |
| EPI_ISL_1239119                                                                                      | Laboratório Central de Saúde Pública do Espírito Santo                                                          | Coordenação Geral de Laboratórios de Saúde Pública (CGLAB)                                                         | Vagner Fonseca et al,                                                                                                                                                                                                                                                                                                                                                                                 |
| EPI_ISL_1239137, EPI_ISL_1239138                                                                     | Fundação Ezequiel Dias                                                                                          | Coordenação Geral de Laboratórios de Saúde Pública (CGLAB)                                                         | Vagner Fonseca et al,                                                                                                                                                                                                                                                                                                                                                                                 |
| EPI_ISL_1261683                                                                                      | LACEN - Laboratório Central de Saúde Pública do Amazonas                                                        | Evandro Chagas Institute                                                                                           | Santos, M.C.; Silva, A.M.; Junior, W.D.C.; Barbagelata, L.S.; Ferreira, J.A.; Sousa, E.M.A.; da Silva, P.S.; Pinheiro, K.C.; L.C.; Sousa Junior, E.C.                                                                                                                                                                                                                                                 |
| EPI_ISL_1261684                                                                                      | LACEN - Laboratório Central de Saúde Pública do Ceará                                                           | Evandro Chagas Institute                                                                                           | Santos, M.C.; Silva, A.M.; Junior, W.D.C.; Barbagelata, L.S.; Ferreira, J.A.; Sousa, E.M.A.; da Silva, P.S.; Pinheiro, K.C.; L.C.; Sousa Junior, E.C.                                                                                                                                                                                                                                                 |
| EPI_ISL_1261685                                                                                      | LACEN - Laboratório Central de Saúde Pública do Amazonas                                                        | Evandro Chagas Institute                                                                                           | Santos, M.C.; Silva, A.M.; Junior, W.D.C.; Barbagelata, L.S.; Ferreira, J.A.; Sousa, E.M.A.; da Silva, P.S.; Pinheiro, K.C.; L.C.; Sousa Junior, E.C.                                                                                                                                                                                                                                                 |
| EPI_ISL_1261686                                                                                      | LACEN - Laboratório Central de Saúde Pública do Amapá                                                           | Evandro Chagas Institute                                                                                           | Santos, M.C.; Silva, A.M.; Junior, W.D.C.; Barbagelata, L.S.; Ferreira, J.A.; Sousa, E.M.A.; da Silva, P.S.; Pinheiro, K.C.; L.C.; Sousa Junior, E.C.                                                                                                                                                                                                                                                 |
| EPI_ISL_1261687                                                                                      | LACEN - Laboratório Central de Saúde Pública de Roraima                                                         | Evandro Chagas Institute                                                                                           | Santos, M.C.; Silva, A.M.; Junior, W.D.C.; Barbagelata, L.S.; Ferreira, J.A.; Sousa, E.M.A.; da Silva, P.S.; Pinheiro, K.C.; L.C.; Sousa Junior, E.C.                                                                                                                                                                                                                                                 |
| EPI_ISL_1261688, EPI_ISL_1261689                                                                     | LACEN - Laboratório Central de Saúde Pública do Amapá                                                           | Evandro Chagas Institute                                                                                           | Santos, M.C.; Silva, A.M.; Junior, W.D.C.; Barbagelata, L.S.; Ferreira, J.A.; Sousa, E.M.A.; da Silva, P.S.; Pinheiro, K.C.; L.C.; Sousa Junior, E.C.                                                                                                                                                                                                                                                 |
| EPI_ISL_1261690                                                                                      | LACEN - Laboratório Central de Saúde Pública do Amazonas                                                        | Evandro Chagas Institute                                                                                           | Santos, M.C.; Silva, A.M.; Junior, W.D.C.; Barbagelata, L.S.; Ferreira, J.A.; Sousa, E.M.A.; da Silva, P.S.; Pinheiro, K.C.; L.C.; Sousa Junior, E.C.                                                                                                                                                                                                                                                 |
| EPI_ISL_1261691                                                                                      | Laboratório Paulo C. Azevedo                                                                                    | Evandro Chagas Institute                                                                                           | Santos, M.C.; Silva, A.M.; Junior, W.D.C.; Barbagelata, L.S.; Ferreira, J.A.; Sousa, E.M.A.; da Silva, P.S.; Pinheiro, K.C.; L.C.; Sousa Junior, E.C.                                                                                                                                                                                                                                                 |
| EPI_ISL_1261692                                                                                      | LACEN - Laboratório Central de Saúde Pública do Amapá                                                           | Evandro Chagas Institute                                                                                           | Santos, M.C.; Silva, A.M.; Junior, W.D.C.; Barbagelata, L.S.; Ferreira, J.A.; Sousa, E.M.A.; da Silva, P.S.; Pinheiro, K.C.; L.C.; Sousa Junior, E.C.                                                                                                                                                                                                                                                 |
| EPI_ISL_1261693                                                                                      | LACEN - Laboratório Central de Saúde Pública do Ceará                                                           | Evandro Chagas Institute                                                                                           | Santos, M.C.; Silva, A.M.; Junior, W.D.C.; Barbagelata, L.S.; Ferreira, J.A.; Sousa, E.M.A.; da Silva, P.S.; Pinheiro, K.C.; L.C.; Sousa Junior, E.C.                                                                                                                                                                                                                                                 |
| EPI_ISL_1261694                                                                                      | LACEN - Laboratório Central de Saúde Pública do Amazonas                                                        | Evandro Chagas Institute                                                                                           | Santos, M.C.; Silva, A.M.; Junior, W.D.C.; Barbagelata, L.S.; Ferreira, J.A.; Sousa, E.M.A.; da Silva, P.S.; Pinheiro, K.C.; L.C.; Sousa Junior, E.C.                                                                                                                                                                                                                                                 |
| EPI_ISL_1262913                                                                                      | Outre Mer                                                                                                       | National Reference Center for Viruses of Respiratory Infections, Institut Pasteur, Paris                           | Marion Barbet, Sylvie Behillil, Méline Bizard, Angela Brisebarre, Camille Capel, Etienne Simon-Lorière, Vincent Enouf, Maud Vanpeene, Sylvie van der Werf, Rousset Dominique                                                                                                                                                                                                                          |
| EPI_ISL_1289960                                                                                      | Laboratory of Virology, Ribeirão Preto General Hospital, Ribeirão Preto Medical School, University of São Paulo | Laboratory of Oncology, Blood Center of Ribeirão Preto, Ribeirão Preto School of Medicine, University of São Paulo | CAMPOS, MR; SANTOS, A.L.P.; YAMAMOTO, A.Y.; COLLI, L.M.; FONSECA, B.A.L.; BELLISSIMO-RODRIGUES, F.                                                                                                                                                                                                                                                                                                    |
| EPI_ISL_1293053, EPI_ISL_1293054, EPI_ISL_1293055                                                    | LACEN de Rondonia                                                                                               | Instituto Adolfo Lutz, Interdisciplinary Procedures Center, Strategic Laboratory                                   | Claudio Tavares Sacchi, Claudia Regina Gonçalves, Erica Valessa Ramos Gomes, Karoline Rodrigues Campos, Caio Vinicius Dias Lopes                                                                                                                                                                                                                                                                      |
| EPI_ISL_1293059, EPI_ISL_1293063, EPI_ISL_1293067, EPI_ISL_1293075, EPI_ISL_1293077, EPI_ISL_1293080 | IAL Regional de Sorocaba                                                                                        | Instituto Adolfo Lutz, Interdisciplinary Procedures Center, Strategic Laboratory                                   | Claudio Tavares Sacchi, Claudia Regina Gonçalves, Erica Valessa Ramos Gomes, Karoline Rodrigues Campos, Caio Vinicius Dias Lopes                                                                                                                                                                                                                                                                      |
| EPI_ISL_1303502, EPI_ISL_1303503                                                                     | LACEN de Rondonia                                                                                               | Instituto Adolfo Lutz, Interdisciplinary Procedures Center, Strategic Laboratory                                   | Claudio Tavares Sacchi, Claudia Regina Gonçalves, Erica Valessa Ramos Gomes, Karoline Rodrigues Campos, Caio Vinicius Dias Lopes                                                                                                                                                                                                                                                                      |
| EPI_ISL_1303506                                                                                      | LACEN do Distrito Federal                                                                                       | Instituto Adolfo Lutz, Interdisciplinary Procedures Center, Strategic Laboratory                                   | Claudio Tavares Sacchi, Claudia Regina Gonçalves, Erica Valessa Ramos Gomes, Karoline Rodrigues Campos, Caio Vinicius Dias Lopes                                                                                                                                                                                                                                                                      |
| EPI_ISL_1303509                                                                                      | LACEN do Estado de Tocantins                                                                                    | Instituto Adolfo Lutz, Interdisciplinary Procedures Center, Strategic Laboratory                                   | Claudio Tavares Sacchi, Claudia Regina Gonçalves, Erica Valessa Ramos Gomes, Karoline Rodrigues Campos, Caio Vinicius Dias Lopes                                                                                                                                                                                                                                                                      |
| EPI_ISL_1303512, EPI_ISL_1303513, EPI_ISL_1303514, EPI_ISL_1303515, EPI_ISL_1303517                  | LACEN do Estado de Goiás                                                                                        | Instituto Adolfo Lutz, Interdisciplinary Procedures Center, Strategic Laboratory                                   | Claudio Tavares Sacchi, Claudia Regina Gonçalves, Erica Valessa Ramos Gomes, Karoline Rodrigues Campos, Caio Vinicius Dias Lopes                                                                                                                                                                                                                                                                      |
| EPI_ISL_1303520, EPI_ISL_1303522, EPI_ISL_1303525, EPI_ISL_1303529                                   | IAL Regional de São Jose do Rio Preto                                                                           | Instituto Adolfo Lutz, Interdisciplinary Procedures Center, Strategic Laboratory                                   | Claudio Tavares Sacchi, Claudia Regina Gonçalves, Erica Valessa Ramos Gomes, Karoline Rodrigues Campos, Caio Vinicius Dias Lopes                                                                                                                                                                                                                                                                      |
| EPI_ISL_1303536                                                                                      | Hospital Heliopolis                                                                                             | Instituto Adolfo Lutz, Interdisciplinary Procedures Center, Strategic Laboratory                                   | Claudio Tavares Sacchi, Claudia Regina Gonçalves, Erica Valessa Ramos Gomes, Karoline Rodrigues Campos, Caio Vinicius Dias Lopes                                                                                                                                                                                                                                                                      |
| EPI_ISL_1303537                                                                                      | Hospital Estadual de Vila Alpina                                                                                | Instituto Adolfo Lutz, Interdisciplinary Procedures Center, Strategic Laboratory                                   | Claudio Tavares Sacchi, Claudia Regina Gonçalves, Erica Valessa Ramos Gomes, Karoline Rodrigues Campos, Caio Vinicius Dias Lopes                                                                                                                                                                                                                                                                      |
| EPI_ISL_1303539                                                                                      | Hospital Presidente                                                                                             | Instituto Adolfo Lutz, Interdisciplinary Procedures Center, Strategic Laboratory                                   | Claudio Tavares Sacchi, Claudia Regina Gonçalves, Erica Valessa Ramos Gomes, Karoline Rodrigues Campos, Caio Vinicius Dias Lopes                                                                                                                                                                                                                                                                      |
| EPI_ISL_1303541                                                                                      | Hospital Municipal Cidade Tiradentes Carmen Prudente                                                            | Instituto Adolfo Lutz, Interdisciplinary Procedures Center, Strategic Laboratory                                   | Claudio Tavares Sacchi, Claudia Regina Gonçalves, Erica Valessa Ramos Gomes, Karoline Rodrigues Campos, Caio Vinicius Dias Lopes                                                                                                                                                                                                                                                                      |
| EPI_ISL_1303542, EPI_ISL_1303543                                                                     | Hospital Estadual de Campanha Barradas                                                                          | Instituto Adolfo Lutz, Interdisciplinary Procedures Center, Strategic Laboratory                                   | Claudio Tavares Sacchi, Claudia Regina Gonçalves, Erica Valessa Ramos Gomes, Karoline Rodrigues Campos, Caio Vinicius Dias Lopes                                                                                                                                                                                                                                                                      |
| EPI_ISL_1303545                                                                                      | Hospital Municipal Cidade Tiradentes Carmen Prudente                                                            | Instituto Adolfo Lutz, Interdisciplinary Procedures Center, Strategic Laboratory                                   | Claudio Tavares Sacchi, Claudia Regina Gonçalves, Erica Valessa Ramos Gomes, Karoline Rodrigues Campos, Caio Vinicius Dias Lopes                                                                                                                                                                                                                                                                      |
| EPI_ISL_1303546, EPI_ISL_1303547, EPI_ISL_1303548, EPI_ISL_1303549                                   | UPA Vila Santa Catarina                                                                                         | Instituto Adolfo Lutz, Interdisciplinary Procedures Center, Strategic Laboratory                                   | Claudio Tavares Sacchi, Claudia Regina Gonçalves, Erica Valessa Ramos Gomes, Karoline Rodrigues Campos, Caio Vinicius Dias Lopes                                                                                                                                                                                                                                                                      |
| EPI_ISL_1321468, EPI_ISL_1321469, EPI_ISL_1321470, EPI_ISL_1321471, EPI_ISL_1321472, EPI_ISL_1321473 | Genetica Molecular and Subdepartamento de Virologia ISP Chile                                                   | Instituto de Salud Publica de Chile                                                                                | Javier Tognarelli, Karen Orostica, Barbara Parra, Loredana Arata, Jaime Lagos, Gisselle Barra, Patricia Bustos, Rodrigo Fasce, Andres Castillo, Jorge Fernandez                                                                                                                                                                                                                                       |
| EPI_ISL_1358285                                                                                      | Centro de Treinamento e Referencia DST AIDS                                                                     | Instituto Adolfo Lutz, Interdisciplinary Procedures Center, Strategic Laboratory                                   | Claudio Tavares Sacchi, Claudia Regina Gonçalves, Erica Valessa Ramos Gomes, Karoline Rodrigues Campos, Caio Vinicius Dias Lopes                                                                                                                                                                                                                                                                      |
| EPI_ISL_1358286                                                                                      | Hospital Municipal Josanias Castanha Braga                                                                      | Instituto Adolfo Lutz, Interdisciplinary Procedures Center, Strategic Laboratory                                   | Claudio Tavares Sacchi, Claudia Regina Gonçalves, Erica Valessa Ramos Gomes, Karoline Rodrigues Campos, Caio Vinicius Dias Lopes                                                                                                                                                                                                                                                                      |

|                                                                                                                                                                                                                                              |                                                                                |                                                                                          |                                                                                                                                                                                                                                                                                                                                                                                                                                                                                                                                                                                     |                                                                                                                                  |
|----------------------------------------------------------------------------------------------------------------------------------------------------------------------------------------------------------------------------------------------|--------------------------------------------------------------------------------|------------------------------------------------------------------------------------------|-------------------------------------------------------------------------------------------------------------------------------------------------------------------------------------------------------------------------------------------------------------------------------------------------------------------------------------------------------------------------------------------------------------------------------------------------------------------------------------------------------------------------------------------------------------------------------------|----------------------------------------------------------------------------------------------------------------------------------|
| EPI_ISL_1358287                                                                                                                                                                                                                              | Hospital Nipo Brasileiro                                                       | Instituto Adolfo Lutz, Interdisciplinary Procedures Center, Strategic Laboratory         | Claudio Tavares Sacchi, Claudia Regina Gonçalves, Erica Valessa Ramos Gomes, Karoline Rodrigues Campos, Caio Vinicius Dias Lopes                                                                                                                                                                                                                                                                                                                                                                                                                                                    |                                                                                                                                  |
| EPI_ISL_1358288, EPI_ISL_1358289, EPI_ISL_1358290                                                                                                                                                                                            | IAL Regional de Aracatuba                                                      | Instituto Adolfo Lutz, Interdisciplinary Procedures Center, Strategic Laboratory         | Claudio Tavares Sacchi, Claudia Regina Gonçalves, Erica Valessa Ramos Gomes, Karoline Rodrigues Campos, Caio Vinicius Dias Lopes                                                                                                                                                                                                                                                                                                                                                                                                                                                    |                                                                                                                                  |
| EPI_ISL_1358292, EPI_ISL_1358293                                                                                                                                                                                                             | IAL Regional de Santo Andre                                                    | Instituto Adolfo Lutz, Interdisciplinary Procedures Center, Strategic Laboratory         | Claudio Tavares Sacchi, Claudia Regina Gonçalves, Erica Valessa Ramos Gomes, Karoline Rodrigues Campos, Caio Vinicius Dias Lopes                                                                                                                                                                                                                                                                                                                                                                                                                                                    |                                                                                                                                  |
| EPI_ISL_1358300, EPI_ISL_1358301                                                                                                                                                                                                             | Lacen de Tocantins                                                             | Instituto Adolfo Lutz, Interdisciplinary Procedures Center, Strategic Laboratory         | Claudio Tavares Sacchi, Claudia Regina Gonçalves, Erica Valessa Ramos Gomes, Karoline Rodrigues Campos, Caio Vinicius Dias Lopes                                                                                                                                                                                                                                                                                                                                                                                                                                                    |                                                                                                                                  |
| EPI_ISL_1358304                                                                                                                                                                                                                              | LACEN do Mato Grosso do Sul                                                    | Instituto Adolfo Lutz, Interdisciplinary Procedures Center, Strategic Laboratory         | Claudio Tavares Sacchi, Claudia Regina Gonçalves, Erica Valessa Ramos Gomes, Karoline Rodrigues Campos, Caio Vinicius Dias Lopes                                                                                                                                                                                                                                                                                                                                                                                                                                                    |                                                                                                                                  |
| EPI_ISL_1358318, EPI_ISL_1358319, EPI_ISL_1358320, EPI_ISL_1358321                                                                                                                                                                           | UPA Vila Santa Catarina                                                        | Instituto Adolfo Lutz, Interdisciplinary Procedures Center, Strategic Laboratory         | Claudio Tavares Sacchi, Claudia Regina Gonçalves, Erica Valessa Ramos Gomes, Karoline Rodrigues Campos, Caio Vinicius Dias Lopes                                                                                                                                                                                                                                                                                                                                                                                                                                                    |                                                                                                                                  |
| EPI_ISL_1365747                                                                                                                                                                                                                              | Associação Fundo de Incentivo a Pesquisa                                       | Associação Fundo de Incentivo a Pesquisa                                                 | Priscila Farias Tempaku, Juliana Nogueira Martins Rodrigues, Erika Rodrigues de Oliveira, Soraya Sgambatti de Andrade, Debora Ribeiro Ramadan, Sergio Tufik                                                                                                                                                                                                                                                                                                                                                                                                                         |                                                                                                                                  |
| EPI_ISL_1370577                                                                                                                                                                                                                              | Dutch COVID-19 response team                                                   | National Institute for Public Health and the Environment (RIVM)                          | Adam Meijer, Harry Vennema, Dirk Eggink, Jeroen Cremer, Sharon van den Brink, Bas van der Veer, AnneMarie van den Brandt, Florian Zwagemaker, Dennis Schmitz, Chantal Reusken, on behalf of the national COVID-19 response team                                                                                                                                                                                                                                                                                                                                                     |                                                                                                                                  |
| EPI_ISL_1381045, EPI_ISL_1381047, EPI_ISL_1381048, EPI_ISL_1381050, EPI_ISL_1381052, EPI_ISL_1381055, EPI_ISL_1381056, EPI_ISL_1381057, EPI_ISL_1381059, EPI_ISL_1381060, EPI_ISL_1381061, EPI_ISL_1381062, EPI_ISL_1381063, EPI_ISL_1381065 | see above                                                                      | IAL Regional de Santo Andre                                                              | Instituto Adolfo Lutz, Interdisciplinary Procedures Center, Strategic Laboratory                                                                                                                                                                                                                                                                                                                                                                                                                                                                                                    | Claudio Tavares Sacchi, Claudia Regina Gonçalves, Erica Valessa Ramos Gomes, Karoline Rodrigues Campos, Caio Vinicius Dias Lopes |
| EPI_ISL_1381068                                                                                                                                                                                                                              | Conjunto Hospitalar do Mandaqui de Sao Paulo                                   | Instituto Adolfo Lutz, Interdisciplinary Procedures Center, Strategic Laboratory         | Claudio Tavares Sacchi, Claudia Regina Gonçalves, Erica Valessa Ramos Gomes, Karoline Rodrigues Campos, Caio Vinicius Dias Lopes                                                                                                                                                                                                                                                                                                                                                                                                                                                    |                                                                                                                                  |
| EPI_ISL_1381069                                                                                                                                                                                                                              | Hospital Heliopolis                                                            | Instituto Adolfo Lutz, Interdisciplinary Procedures Center, Strategic Laboratory         | Claudio Tavares Sacchi, Claudia Regina Gonçalves, Erica Valessa Ramos Gomes, Karoline Rodrigues Campos, Caio Vinicius Dias Lopes                                                                                                                                                                                                                                                                                                                                                                                                                                                    |                                                                                                                                  |
| EPI_ISL_1381070, EPI_ISL_1381071                                                                                                                                                                                                             | Hospital Municipal Cidade Tiradentes Carmem Prudente                           | Instituto Adolfo Lutz, Interdisciplinary Procedures Center, Strategic Laboratory         | Claudio Tavares Sacchi, Claudia Regina Gonçalves, Erica Valessa Ramos Gomes, Karoline Rodrigues Campos, Caio Vinicius Dias Lopes                                                                                                                                                                                                                                                                                                                                                                                                                                                    |                                                                                                                                  |
| EPI_ISL_1381214                                                                                                                                                                                                                              | Sentinelles Paris                                                              | National Reference Center for Viruses of Respiratory Infections, Institut Pasteur, Paris | Marion Barbet, Sylvie Behillil, Méline Bizard, Angela Brisebarre, Camille Capel, Louise Lefrançois, Etienne Simon-Lorière, Vincent Enouf, Maud Vanpeene, Sylvie van der Werf, Rousset Dominique                                                                                                                                                                                                                                                                                                                                                                                     |                                                                                                                                  |
| EPI_ISL_1381216, EPI_ISL_1381217                                                                                                                                                                                                             | Hospital                                                                       | National Reference Center for Viruses of Respiratory Infections, Institut Pasteur, Paris | Marion Barbet, Sylvie Behillil, Méline Bizard, Angela Brisebarre, Camille Capel, Louise Lefrançois, Etienne Simon-Lorière, Vincent Enouf, Maud Vanpeene, Sylvie van der Werf, Rousset Dominique                                                                                                                                                                                                                                                                                                                                                                                     |                                                                                                                                  |
| EPI_ISL_1381222                                                                                                                                                                                                                              | Labo Analyses Med                                                              | National Reference Center for Viruses of Respiratory Infections, Institut Pasteur, Paris | Marion Barbet, Sylvie Behillil, Méline Bizard, Angela Brisebarre, Camille Capel, Louise Lefrançois, Etienne Simon-Lorière, Vincent Enouf, Maud Vanpeene, Sylvie van der Werf, Rousset Dominique                                                                                                                                                                                                                                                                                                                                                                                     |                                                                                                                                  |
| EPI_ISL_1402431                                                                                                                                                                                                                              | Laboratory of Respiratory Viruses and Measles, Oswaldo Cruz Institute, FIOCRUZ | Laboratory of Respiratory Viruses and Measles, Oswaldo Cruz Institute, FIOCRUZ           | Paola Resende, Felipe Naveca, Alex Pauvolid-Correa, Mia Ferreira Araujo, Ana Beatriz Machado Lima, Luciana Appolinario, Fernando Motta, Anna Carolina Paixao, Ana Carolina Mendonca, Alice Sampaio Rocha, Renata Serrano Lopes, Marilda Siqueira on behalf of the FioCruz COVID-19 Genomic Surveillance Network                                                                                                                                                                                                                                                                     |                                                                                                                                  |
| EPI_ISL_1443196, EPI_ISL_1443197, EPI_ISL_1443198                                                                                                                                                                                            | Hospital Aliança                                                               | Hospital São Rafael - IDOR                                                               | Isadora Cristina de Siqueira, Aquiles Assunção Camelier, Elves A.P. Maciel, Margarida Celia L. C. Neves, Carolina Kymie Vasques Nonaka, Karoline Almeida Félix de Sousa, Victor Costa Araujo, Yasmin Santos Freitas Macêdo, Aurea Angelica Paste, Bruno Solano de Freitas Souza, Tiago Gráf                                                                                                                                                                                                                                                                                         |                                                                                                                                  |
| EPI_ISL_1445071                                                                                                                                                                                                                              | USF TRES PONTES                                                                | Instituto Butantan / Mendelics                                                           | Dimas Tadeu Covas, Sandra Coccuzzo Sampaio, Maria Carolina Elias, José Salvatore Leister Patané, Vincent Louis Viala, Antonio Jorge Martins, Ricardo Haddad, Claudia Renata dos Santos Barros, Elaine Cristina Marqueze, Raul Machado Neto, Debora Botequiu Moretti, Bibiana Santos, João Paulo Kitajima, Erika Freitas, David Schlesinger, Simone Kashima, Evandra Strazza Rodrigues, Svetoslav Nanev Slavov, Elaine Vieira dos Santos, Rafael dos Santos Bezerra, Luiz Carlos Junior de Alcantara, Marta Giovanetti, Vagner Fonseca, Flavia Aburjaille, Rodrigo Tocantins Calado. |                                                                                                                                  |
| EPI_ISL_1445072                                                                                                                                                                                                                              | USF JARDIM SAO DIMAS                                                           | Instituto Butantan / Mendelics                                                           | Dimas Tadeu Covas, Sandra Coccuzzo Sampaio, Maria Carolina Elias, José Salvatore Leister Patané, Vincent Louis Viala, Antonio Jorge Martins, Ricardo Haddad, Claudia Renata dos Santos Barros, Elaine Cristina Marqueze, Raul Machado Neto, Debora Botequiu Moretti, Bibiana Santos, João Paulo Kitajima, Erika Freitas, David Schlesinger, Simone Kashima, Evandra Strazza Rodrigues, Svetoslav Nanev Slavov, Elaine Vieira dos Santos, Rafael dos Santos Bezerra, Luiz Carlos Junior de Alcantara, Marta Giovanetti, Vagner Fonseca, Flavia Aburjaille, Rodrigo Tocantins Calado. |                                                                                                                                  |
| EPI_ISL_1445078                                                                                                                                                                                                                              | CENTRO DE SAUDE II DR GABRIEL MESQUITA VARGEM GDE DO SUL                       | Instituto Butantan / Mendelics                                                           | Dimas Tadeu Covas, Sandra Coccuzzo Sampaio, Maria Carolina Elias, José Salvatore Leister Patané, Vincent Louis Viala, Antonio Jorge Martins, Ricardo Haddad, Claudia Renata dos Santos Barros, Elaine Cristina Marqueze, Raul Machado Neto, Debora Botequiu Moretti, Bibiana Santos, João Paulo Kitajima, Erika Freitas, David Schlesinger, Simone Kashima, Evandra Strazza Rodrigues, Svetoslav Nanev Slavov, Elaine Vieira dos Santos, Rafael dos Santos Bezerra, Luiz Carlos Junior de Alcantara, Marta Giovanetti, Vagner Fonseca, Flavia Aburjaille, Rodrigo Tocantins Calado. |                                                                                                                                  |
| EPI_ISL_1445082                                                                                                                                                                                                                              | SECRETARIA MUNICIPAL DE SAUDE SOROCABA                                         | Instituto Butantan / Mendelics                                                           | Dimas Tadeu Covas, Sandra Coccuzzo Sampaio, Maria Carolina Elias, José Salvatore Leister Patané, Vincent Louis Viala, Antonio Jorge Martins, Ricardo Haddad, Claudia Renata dos Santos Barros, Elaine Cristina Marqueze, Raul Machado Neto, Debora Botequiu Moretti, Bibiana Santos, João Paulo Kitajima, Erika Freitas, David Schlesinger, Simone Kashima, Evandra Strazza Rodrigues, Svetoslav Nanev Slavov, Elaine Vieira dos Santos, Rafael dos Santos Bezerra, Luiz Carlos Junior de Alcantara, Marta Giovanetti, Vagner Fonseca, Flavia Aburjaille, Rodrigo Tocantins Calado. |                                                                                                                                  |
| EPI_ISL_1445084                                                                                                                                                                                                                              | SMS SECRETARIA MUNICIPAL DE SAUDE DE BOITUVA                                   | Instituto Butantan / Mendelics                                                           | Dimas Tadeu Covas, Sandra Coccuzzo Sampaio, Maria Carolina Elias, José Salvatore Leister Patané, Vincent Louis Viala, Antonio Jorge Martins, Ricardo Haddad, Claudia Renata dos Santos Barros, Elaine Cristina Marqueze, Raul Machado Neto, Debora Botequiu Moretti, Bibiana Santos, João Paulo Kitajima, Erika Freitas, David Schlesinger, Simone Kashima, Evandra Strazza Rodrigues, Svetoslav Nanev Slavov, Elaine Vieira dos Santos, Rafael dos Santos Bezerra, Luiz Carlos Junior de Alcantara, Marta Giovanetti, Vagner Fonseca, Flavia Aburjaille, Rodrigo Tocantins Calado. |                                                                                                                                  |
| EPI_ISL_1445088                                                                                                                                                                                                                              | SECRETARIA MUNICIPAL DE SAUDE SOROCABA                                         | Instituto Butantan / Mendelics                                                           | Dimas Tadeu Covas, Sandra Coccuzzo Sampaio, Maria Carolina Elias, José Salvatore Leister Patané, Vincent Louis Viala, Antonio Jorge Martins, Ricardo Haddad, Claudia Renata dos Santos Barros, Elaine Cristina Marqueze, Raul Machado Neto, Debora Botequiu Moretti, Bibiana Santos, João Paulo Kitajima, Erika Freitas, David Schlesinger, Simone Kashima, Evandra Strazza Rodrigues, Svetoslav Nanev Slavov, Elaine Vieira dos Santos, Rafael dos Santos Bezerra, Luiz Carlos Junior de Alcantara, Marta Giovanetti, Vagner Fonseca, Flavia Aburjaille, Rodrigo Tocantins Calado. |                                                                                                                                  |
| EPI_ISL_1445091, EPI_ISL_1445092, EPI_ISL_1445093, EPI_ISL_1445094, EPI_ISL_1445095                                                                                                                                                          | SECRETARIA MUNICIPAL DE SAUDE DE PIRACAIA                                      | Instituto Butantan / Mendelics                                                           | Dimas Tadeu Covas, Sandra Coccuzzo Sampaio, Maria Carolina Elias, José Salvatore Leister Patané, Vincent Louis Viala, Antonio Jorge Martins, Ricardo Haddad, Claudia Renata dos Santos Barros, Elaine Cristina Marqueze, Raul Machado Neto, Debora Botequiu Moretti, Bibiana Santos, João Paulo Kitajima, Erika Freitas, David Schlesinger, Simone Kashima, Evandra Strazza Rodrigues, Svetoslav Nanev Slavov, Elaine Vieira dos Santos, Rafael dos Santos Bezerra, Luiz Carlos Junior de Alcantara, Marta Giovanetti, Vagner Fonseca, Flavia Aburjaille, Rodrigo Tocantins Calado. |                                                                                                                                  |
| EPI_ISL_1445096, EPI_ISL_1445097, EPI_ISL_1445098, EPI_ISL_1445100                                                                                                                                                                           | PRONTO ATENDIMENTO VILA PADRE ANCHIETA                                         | Instituto Butantan / Mendelics                                                           | Dimas Tadeu Covas, Sandra Coccuzzo Sampaio, Maria Carolina Elias, José Salvatore Leister Patané, Vincent Louis Viala, Antonio Jorge Martins, Ricardo Haddad, Claudia Renata dos Santos Barros, Elaine Cristina Marqueze, Raul Machado Neto, Debora Botequiu Moretti, Bibiana Santos, João Paulo Kitajima, Erika Freitas, David Schlesinger, Simone Kashima, Evandra Strazza Rodrigues, Svetoslav Nanev Slavov, Elaine Vieira dos Santos, Rafael dos Santos Bezerra, Luiz Carlos Junior de Alcantara, Marta Giovanetti, Vagner Fonseca, Flavia Aburjaille, Rodrigo Tocantins Calado. |                                                                                                                                  |
| EPI_ISL_1445101                                                                                                                                                                                                                              | SECRETARIA MUNICIPAL DE SAUDE DE PIRACAIA                                      | Instituto Butantan / Mendelics                                                           | Dimas Tadeu Covas, Sandra Coccuzzo Sampaio, Maria Carolina Elias, José Salvatore Leister Patané, Vincent Louis Viala, Antonio Jorge Martins, Ricardo Haddad, Claudia Renata dos Santos Barros, Elaine Cristina Marqueze, Raul Machado Neto, Debora Botequiu Moretti, Bibiana Santos, João Paulo Kitajima, Erika Freitas, David Schlesinger, Simone Kashima, Evandra Strazza Rodrigues, Svetoslav Nanev Slavov, Elaine Vieira dos Santos, Rafael dos Santos Bezerra, Luiz Carlos Junior de Alcantara, Marta Giovanetti, Vagner Fonseca, Flavia Aburjaille, Rodrigo Tocantins Calado. |                                                                                                                                  |
| EPI_ISL_1445102, EPI_ISL_1445103, EPI_ISL_1445104, EPI_ISL_1445106                                                                                                                                                                           | PRONTO ATENDIMENTO VILA PADRE ANCHIETA                                         | Instituto Butantan / Mendelics                                                           | Dimas Tadeu Covas, Sandra Coccuzzo Sampaio, Maria Carolina Elias, José Salvatore Leister Patané, Vincent Louis Viala, Antonio Jorge Martins, Ricardo Haddad, Claudia Renata dos Santos Barros, Elaine Cristina Marqueze, Raul Machado Neto, Debora Botequiu Moretti, Bibiana Santos, João Paulo                                                                                                                                                                                                                                                                                     |                                                                                                                                  |







|                                                                                                                                                                                                                                                                                                                                                                                                                                                          |                                                                       |                                                                                   |                                                                                                                                                                                                                                                                                                                                                                                                                                                                                  |
|----------------------------------------------------------------------------------------------------------------------------------------------------------------------------------------------------------------------------------------------------------------------------------------------------------------------------------------------------------------------------------------------------------------------------------------------------------|-----------------------------------------------------------------------|-----------------------------------------------------------------------------------|----------------------------------------------------------------------------------------------------------------------------------------------------------------------------------------------------------------------------------------------------------------------------------------------------------------------------------------------------------------------------------------------------------------------------------------------------------------------------------|
| see above                                                                                                                                                                                                                                                                                                                                                                                                                                                | Laboratório de Virologia - UNIFESP                                    | Laboratory of Respiratory Viruses and Measles, Oswaldo Cruz Institute, FIOCRUZ    | Paola Resende, Nancy Beleí, Luciana Appolinario, Fernando Motta, Anna Carolina Paixao, Ana Carolina Mendonca, Alice Sampaio Rocha, Renata Serrano Lopes, Marilda Siqueira on behalf of the Fiocruz COVID-19 Genomic Surveillance Network                                                                                                                                                                                                                                         |
| EPI_ISL_1465188, EPI_ISL_1465189, EPI_ISL_1465191, EPI_ISL_1465192, EPI_ISL_1465194, EPI_ISL_1465195, EPI_ISL_1465196, EPI_ISL_1465198, EPI_ISL_1465199, EPI_ISL_1465201, EPI_ISL_1465202, EPI_ISL_1465203, EPI_ISL_1465205, EPI_ISL_1465206, EPI_ISL_1465208, EPI_ISL_1465209, EPI_ISL_1465210, EPI_ISL_1465212, EPI_ISL_1465213, EPI_ISL_1465215, EPI_ISL_1465216, EPI_ISL_1465217, EPI_ISL_1465219, EPI_ISL_1465220, EPI_ISL_1465221, EPI_ISL_1465222 |                                                                       |                                                                                   |                                                                                                                                                                                                                                                                                                                                                                                                                                                                                  |
| see above                                                                                                                                                                                                                                                                                                                                                                                                                                                | Laboratório Central de Saude Publica do Estado do Maranhao (LACEN-MA) | Laboratory of Respiratory Viruses and Measles, Oswaldo Cruz Institute, FIOCRUZ    | Paola Resende, Luciana Appolinario, Fernando Motta, Anna Carolina Paixao, Ana Carolina Mendonca, Alice Sampaio Rocha, Renata Serrano Lopes, Lidio Gonçalves Lima Neto, Marilda Siqueira on behalf of the Fiocruz COVID-19 Genomic Surveillance Network                                                                                                                                                                                                                           |
| EPI_ISL_1468413, EPI_ISL_1468414, EPI_ISL_1468415                                                                                                                                                                                                                                                                                                                                                                                                        | LACEN do Estado de Goias                                              | Instituto Adolfo Lutz, Interdisciplinary Procedures Center, Strategic Laboratory  | Claudio Tavares Sacchi, Claudia Regina Gonçalves, Erica Valessa Ramos Gomes, Karoline Rodrigues Campos, Caio Vinicius Dias Lopes                                                                                                                                                                                                                                                                                                                                                 |
| EPI_ISL_1468416                                                                                                                                                                                                                                                                                                                                                                                                                                          | Secretaria Municipal de Saude de Andradina                            | Instituto Adolfo Lutz, Interdisciplinary Procedures Center, Strategic Laboratory  | Claudio Tavares Sacchi, Claudia Regina Gonçalves, Erica Valessa Ramos Gomes, Karoline Rodrigues Campos, Caio Vinicius Dias Lopes                                                                                                                                                                                                                                                                                                                                                 |
| EPI_ISL_1468417                                                                                                                                                                                                                                                                                                                                                                                                                                          | Santa Casa de Aracatuba Hospital Sagrado Coracao de Jesus             | Instituto Adolfo Lutz, Interdisciplinary Procedures Center, Strategic Laboratory  | Claudio Tavares Sacchi, Claudia Regina Gonçalves, Erica Valessa Ramos Gomes, Karoline Rodrigues Campos, Caio Vinicius Dias Lopes                                                                                                                                                                                                                                                                                                                                                 |
| EPI_ISL_1468418                                                                                                                                                                                                                                                                                                                                                                                                                                          | Secretaria Municipal de Saude de Birigui                              | Instituto Adolfo Lutz, Interdisciplinary Procedures Center, Strategic Laboratory  | Claudio Tavares Sacchi, Claudia Regina Gonçalves, Erica Valessa Ramos Gomes, Karoline Rodrigues Campos, Caio Vinicius Dias Lopes                                                                                                                                                                                                                                                                                                                                                 |
| EPI_ISL_1468419                                                                                                                                                                                                                                                                                                                                                                                                                                          | Santa Casa de Aracatuba Hospital Sagrado Coracao de Jesus             | Instituto Adolfo Lutz, Interdisciplinary Procedures Center, Strategic Laboratory  | Claudio Tavares Sacchi, Claudia Regina Gonçalves, Erica Valessa Ramos Gomes, Karoline Rodrigues Campos, Caio Vinicius Dias Lopes                                                                                                                                                                                                                                                                                                                                                 |
| EPI_ISL_1468420, EPI_ISL_1468421                                                                                                                                                                                                                                                                                                                                                                                                                         | Santa Casa de Birigui                                                 | Instituto Adolfo Lutz, Interdisciplinary Procedures Center, Strategic Laboratory  | Claudio Tavares Sacchi, Claudia Regina Gonçalves, Erica Valessa Ramos Gomes, Karoline Rodrigues Campos, Caio Vinicius Dias Lopes                                                                                                                                                                                                                                                                                                                                                 |
| EPI_ISL_1468422, EPI_ISL_1468423                                                                                                                                                                                                                                                                                                                                                                                                                         | Penitenciária Compacta de Avanhandava                                 | Instituto Adolfo Lutz, Interdisciplinary Procedures Center, Strategic Laboratory  | Claudio Tavares Sacchi, Claudia Regina Gonçalves, Erica Valessa Ramos Gomes, Karoline Rodrigues Campos, Caio Vinicius Dias Lopes                                                                                                                                                                                                                                                                                                                                                 |
| EPI_ISL_1468424                                                                                                                                                                                                                                                                                                                                                                                                                                          | Santa Casa de Aracatuba Hospital Sagrado Coracao de Jesus             | Instituto Adolfo Lutz, Interdisciplinary Procedures Center, Strategic Laboratory  | Claudio Tavares Sacchi, Claudia Regina Gonçalves, Erica Valessa Ramos Gomes, Karoline Rodrigues Campos, Caio Vinicius Dias Lopes                                                                                                                                                                                                                                                                                                                                                 |
| EPI_ISL_1468425                                                                                                                                                                                                                                                                                                                                                                                                                                          | Santa Casa de Birigui                                                 | Instituto Adolfo Lutz, Interdisciplinary Procedures Center, Strategic Laboratory  | Claudio Tavares Sacchi, Claudia Regina Gonçalves, Erica Valessa Ramos Gomes, Karoline Rodrigues Campos, Caio Vinicius Dias Lopes                                                                                                                                                                                                                                                                                                                                                 |
| EPI_ISL_1468426, EPI_ISL_1468427                                                                                                                                                                                                                                                                                                                                                                                                                         | Centro de Saude II Matao                                              | Instituto Adolfo Lutz, Interdisciplinary Procedures Center, Strategic Laboratory  | Claudio Tavares Sacchi, Claudia Regina Gonçalves, Erica Valessa Ramos Gomes, Karoline Rodrigues Campos, Caio Vinicius Dias Lopes                                                                                                                                                                                                                                                                                                                                                 |
| EPI_ISL_1468428                                                                                                                                                                                                                                                                                                                                                                                                                                          | SAE Servico de Atendimento Especializado                              | Instituto Adolfo Lutz, Interdisciplinary Procedures Center, Strategic Laboratory  | Claudio Tavares Sacchi, Claudia Regina Gonçalves, Erica Valessa Ramos Gomes, Karoline Rodrigues Campos, Caio Vinicius Dias Lopes                                                                                                                                                                                                                                                                                                                                                 |
| EPI_ISL_1468429, EPI_ISL_1468430                                                                                                                                                                                                                                                                                                                                                                                                                         | Centro de Saude II Matao                                              | Instituto Adolfo Lutz, Interdisciplinary Procedures Center, Strategic Laboratory  | Claudio Tavares Sacchi, Claudia Regina Gonçalves, Erica Valessa Ramos Gomes, Karoline Rodrigues Campos, Caio Vinicius Dias Lopes                                                                                                                                                                                                                                                                                                                                                 |
| EPI_ISL_1470421, EPI_ISL_1470429, EPI_ISL_1470430, EPI_ISL_1470436, EPI_ISL_1470437, EPI_ISL_1470439, EPI_ISL_1470491, EPI_ISL_1470497, EPI_ISL_1470501, EPI_ISL_1470506, EPI_ISL_1470508, EPI_ISL_1470517, EPI_ISL_1470522, EPI_ISL_1470523, EPI_ISL_1470531, EPI_ISL_1470534, EPI_ISL_1470542, EPI_ISL_1470548, EPI_ISL_1470549, EPI_ISL_1470550, EPI_ISL_1470551, EPI_ISL_1470552, EPI_ISL_1470554, EPI_ISL_1470558                                   |                                                                       |                                                                                   |                                                                                                                                                                                                                                                                                                                                                                                                                                                                                  |
| see above                                                                                                                                                                                                                                                                                                                                                                                                                                                | Genetica Molecular and Subdepartamento de Virologia ISP Chile         | Instituto de Salud Publica de Chile                                               | Javier Tognarelli, Karen Orostica, Barbara Parra, Loredana Arata, Jaime Lagos, Gisselle Barra, Patricia Bustos, Rodrigo Fasce, Andres Castillo, Jorge Fernandez                                                                                                                                                                                                                                                                                                                  |
| EPI_ISL_1493573, EPI_ISL_1493574, EPI_ISL_1493575, EPI_ISL_1493576, EPI_ISL_1493577                                                                                                                                                                                                                                                                                                                                                                      | LACEN do Estado de Goias                                              | Instituto Adolfo Lutz, Interdisciplinary Procedures Center, Strategic Laboratory  | Claudio Tavares Sacchi, Claudia Regina Gonçalves, Erica Valessa Ramos Gomes, Karoline Rodrigues Campos, Caio Vinicius Dias Lopes                                                                                                                                                                                                                                                                                                                                                 |
| EPI_ISL_1493578, EPI_ISL_1493579                                                                                                                                                                                                                                                                                                                                                                                                                         | LACEN do Estado de Rondonia                                           | Instituto Adolfo Lutz, Interdisciplinary Procedures Center, Strategic Laboratory  | Claudio Tavares Sacchi, Claudia Regina Gonçalves, Erica Valessa Ramos Gomes, Karoline Rodrigues Campos, Caio Vinicius Dias Lopes                                                                                                                                                                                                                                                                                                                                                 |
| EPI_ISL_1493580                                                                                                                                                                                                                                                                                                                                                                                                                                          | CS II Dr Miguel Vitaliano Orlandia                                    | Instituto Adolfo Lutz, Interdisciplinary Procedures Center, Strategic Laboratory  | Claudio Tavares Sacchi, Claudia Regina Gonçalves, Erica Valessa Ramos Gomes, Karoline Rodrigues Campos, Caio Vinicius Dias Lopes                                                                                                                                                                                                                                                                                                                                                 |
| EPI_ISL_1493581                                                                                                                                                                                                                                                                                                                                                                                                                                          | Sae servico de Atendimento Especializado                              | Instituto Adolfo Lutz, Interdisciplinary Procedures Center, Strategic Laboratory  | Claudio Tavares Sacchi, Claudia Regina Gonçalves, Erica Valessa Ramos Gomes, Karoline Rodrigues Campos, Caio Vinicius Dias Lopes                                                                                                                                                                                                                                                                                                                                                 |
| EPI_ISL_1493582                                                                                                                                                                                                                                                                                                                                                                                                                                          | CS II Dr Miguel Vitaliano Orlandia                                    | Instituto Adolfo Lutz, Interdisciplinary Procedures Center, Strategic Laboratory  | Claudio Tavares Sacchi, Claudia Regina Gonçalves, Erica Valessa Ramos Gomes, Karoline Rodrigues Campos, Caio Vinicius Dias Lopes                                                                                                                                                                                                                                                                                                                                                 |
| EPI_ISL_1494923                                                                                                                                                                                                                                                                                                                                                                                                                                          | CS II Dr Jose Ferreira Telles                                         | Instituto Adolfo Lutz, Interdisciplinary Procedures Center, Strategic Laboratory  | Claudio Tavares Sacchi, Claudia Regina Gonçalves, Erica Valessa Ramos Gomes, Karoline Rodrigues Campos, Caio Vinicius Dias Lopes                                                                                                                                                                                                                                                                                                                                                 |
| EPI_ISL_1494924                                                                                                                                                                                                                                                                                                                                                                                                                                          | LACEN do Estado de Rondonia                                           | Instituto Adolfo Lutz, Interdisciplinary Procedures Center, Strategic Laboratory  | Claudio Tavares Sacchi, Claudia Regina Gonçalves, Erica Valessa Ramos Gomes, Karoline Rodrigues Campos, Caio Vinicius Dias Lopes                                                                                                                                                                                                                                                                                                                                                 |
| EPI_ISL_1494977, EPI_ISL_1494986, EPI_ISL_1494989, EPI_ISL_1494994, EPI_ISL_1494998, EPI_ISL_1495005, EPI_ISL_1495010, EPI_ISL_1495011, EPI_ISL_1495014, EPI_ISL_1495015, EPI_ISL_1495016, EPI_ISL_1495019, EPI_ISL_1495020, EPI_ISL_1495021, EPI_ISL_1495022, EPI_ISL_1495023, EPI_ISL_1495024, EPI_ISL_1495025, EPI_ISL_1495026, EPI_ISL_1495031, EPI_ISL_1495035, EPI_ISL_1495038                                                                     |                                                                       |                                                                                   |                                                                                                                                                                                                                                                                                                                                                                                                                                                                                  |
| see above                                                                                                                                                                                                                                                                                                                                                                                                                                                | Laboratório de Biologia Integrativa                                   | Laboratório de Biologia Integrativa                                               | Filipe Romero Rebello Moreira, Diego Menezes Bonfim, Victor Emmanuel Viana Geddes, Danielle Alves Gomes Zauli, Joice do Prado Silva, Aline Brito de Lima, Frederico Scott Varella Malta, Alessandro Clayton de Souza Ferreira, Victor Cavalcanti Pardini, Daniel Costa Queiroz, Rafael Marques de Souza, Lucylene Miguita Luiz, Paula Luize Camargos Fonseca, Rennan Garcias Moreira, Nuno Rodrigues Faria, Carolina Moreira Voloch, Renan Pedra de Souza, Renato Santana Aguiar |
| EPI_ISL_1498380                                                                                                                                                                                                                                                                                                                                                                                                                                          | Associação Fundo de Incentivo à Pesquisa (AFIP).                      | Associação Fundo de Incentivo à Pesquisa (AFIP).                                  | Priscila Farias Tempaku, Juliana Nogueira Martins Rodrigues, Erika Rodrigues de Oliveira, Debora R. Ramadan, Soraya Sgambatti de Andrade, Sergio Tufik.                                                                                                                                                                                                                                                                                                                          |
| EPI_ISL_1498916                                                                                                                                                                                                                                                                                                                                                                                                                                          | Associação Fundo de Incentivo à Pesquisa (AFIP)                       | Associação Fundo de Incentivo à Pesquisa (AFIP)                                   | Priscila Farias Tempaku, Juliana Nogueira Martins Rodrigues, Erika Rodrigues de Oliveira, Debora R. Ramadan, Soraya Sgambatti de Andrade, Sergio Tufik.                                                                                                                                                                                                                                                                                                                          |
| EPI_ISL_1498917                                                                                                                                                                                                                                                                                                                                                                                                                                          | Hospital Estadual de Mirandopolis                                     | Instituto Adolfo Lutz, Interdisciplinary Procedures Center, Strategic Laboratory  | Claudio Tavares Sacchi, Claudia Regina Gonçalves, Erica Valessa Ramos Gomes, Karoline Rodrigues Campos, Caio Vinicius Dias Lopes                                                                                                                                                                                                                                                                                                                                                 |
| EPI_ISL_1499105                                                                                                                                                                                                                                                                                                                                                                                                                                          | Associação Fundo de Incentivo à Pesquisa (AFIP)                       | Associação Fundo de Incentivo à Pesquisa (AFIP)                                   | Priscila Farias Tempaku, Juliana Nogueira Martins Rodrigues, Erika Rodrigues de Oliveira, Debora R. Ramadan, Soraya Sgambatti de Andrade, Sergio Tufik.                                                                                                                                                                                                                                                                                                                          |
| EPI_ISL_1509639                                                                                                                                                                                                                                                                                                                                                                                                                                          | UBS de Auriflamma                                                     | Instituto Adolfo Lutz, Interdisciplinary Procedures Center, Strategic Laboratory  | Claudio Tavares Sacchi, Claudia Regina Gonçalves, Erica Valessa Ramos Gomes, Karoline Rodrigues Campos, Caio Vinicius Dias Lopes, Leonardo Jose Tadeu de Araujo                                                                                                                                                                                                                                                                                                                  |
| EPI_ISL_1509720                                                                                                                                                                                                                                                                                                                                                                                                                                          | UBS de Auriflamma                                                     | Instituto Adolfo Lutz, Interdisciplinary Procedures Center, Strategic Laboratory  | Claudio Tavares Sacchi, Claudia Regina Gonçalves, Erica Valessa Ramos Gomes, Karoline Rodrigues Campos, Caio Vinicius Dias Lopes                                                                                                                                                                                                                                                                                                                                                 |
| EPI_ISL_1511643                                                                                                                                                                                                                                                                                                                                                                                                                                          | Genomic and molecular Biology Group, A.C.Camargo Cancer Center        | Laboratory of Bioinformatics and Computational Biology, A.C.Camargo Cancer Center | Giovana Torrezan, Dirce Carraro, Israel Tojal, Alexandre Defelicibus                                                                                                                                                                                                                                                                                                                                                                                                             |
| EPI_ISL_1520108, EPI_ISL_1520109                                                                                                                                                                                                                                                                                                                                                                                                                         | LACEN do Estado de Rondonia                                           | Instituto Adolfo Lutz, Interdisciplinary Procedures Center,                       | Claudio Tavares Sacchi, Claudia Regina Gonçalves, Erica Valessa Ramos Gomes, Karoline Rodrigues Campos, Caio Vinicius Dias Lopes                                                                                                                                                                                                                                                                                                                                                 |

| EPI_ISL                                                                                                                                | Country     | Facility                                                                                                           | Lead                                                                                                               | Co-Leads                                                                                                                                                                                                                                                                                                                                                                                                                                        |
|----------------------------------------------------------------------------------------------------------------------------------------|-------------|--------------------------------------------------------------------------------------------------------------------|--------------------------------------------------------------------------------------------------------------------|-------------------------------------------------------------------------------------------------------------------------------------------------------------------------------------------------------------------------------------------------------------------------------------------------------------------------------------------------------------------------------------------------------------------------------------------------|
| EPI_ISL_1520123                                                                                                                        | Brazil      | Centro de Saude II Dr Jose de Felipe Espito Santo do Pinhal SP                                                     | Instituto Adolfo Lutz, Interdisciplinary Procedures Center, Strategic Laboratory                                   | Claudio Tavares Sacchi, Claudia Regina Gonçalves, Erica Valessa Ramos Gomes, Karoline Rodrigues Campos, Caio Vinicius Dias Lopes                                                                                                                                                                                                                                                                                                                |
| EPI_ISL_1520129, EPI_ISL_1520130, EPI_ISL_1520131, EPI_ISL_1520136                                                                     | Brazil      | Centro de Saude II Dr Jose Paione Mococa                                                                           | Instituto Adolfo Lutz, Interdisciplinary Procedures Center, Strategic Laboratory                                   | Claudio Tavares Sacchi, Claudia Regina Gonçalves, Erica Valessa Ramos Gomes, Karoline Rodrigues Campos, Caio Vinicius Dias Lopes                                                                                                                                                                                                                                                                                                                |
| EPI_ISL_1521321, EPI_ISL_1521322, EPI_ISL_1521323, EPI_ISL_1521324, EPI_ISL_1521325, EPI_ISL_1521326, EPI_ISL_1521327, EPI_ISL_1521328 | Netherlands | Dutch COVID-19 response team                                                                                       | National Institute for Public Health and the Environment (RIVM)                                                    | Adam Meijer, Harry Vennema, Dirk Eggink, Jeroen Cremer, Sharon van den Brink, Bas van der Veer, AnneMarie van den Brandt, Lisa Wijsman, Kim Freriks, Ryanne Jaarsma, Eunice Then, Jolienke Hardeman, Lynn Aarts, Sanne Bos, Melissa van Tuil, Robert Kohl, Linda van de Nes, Sjoerd Kuiling, James Groot, Florian Zwagemaker, Dennis Schmitz, Annelies Kroneman, Karim Hajji, Chantal Reusken, on behalf of the national COVID-19 response team |
| EPI_ISL_1533609                                                                                                                        | Brazil      | Laboratorio de Ecologia de Doencas Transmissiveis na Amazonia, Instituto Leonidas e Maria Deane - Fiocruz Amazonia | Laboratorio de Ecologia de Doencas Transmissiveis na Amazonia, Instituto Leonidas e Maria Deane - Fiocruz Amazonia | Valdinete Nascimento, Victor Souza, André Corado, Fernanda Nascimento, George Silva, Ágatha Costa, Debora Duarte, Karina Pessoa, Matilde Mejía, Luciana Gonçalves, Maria Júlia Brandão, Michele Jesus, Felipe Naveca                                                                                                                                                                                                                            |
| EPI_ISL_1533689, EPI_ISL_1533690                                                                                                       | Brazil      | Centro de Saude II Dr. Jose Paione Mococa                                                                          | Instituto Adolfo Lutz, Interdisciplinary Procedures Center, Strategic Laboratory                                   | Claudio Tavares Sacchi, Claudia Regina Gonçalves, Erica Valessa Ramos Gomes, Karoline Rodrigues Campos, Caio Vinicius Dias Lopes, Leonardo Jose Tadeu de Araujo                                                                                                                                                                                                                                                                                 |
| EPI_ISL_1533695                                                                                                                        | Brazil      | Hospital Municipal Dr Mario Gatti                                                                                  | Instituto Adolfo Lutz, Interdisciplinary Procedures Center, Strategic Laboratory                                   | Claudio Tavares Sacchi, Claudia Regina Gonçalves, Erica Valessa Ramos Gomes, Karoline Rodrigues Campos, Caio Vinicius Dias Lopes, Leonardo Jose Tadeu de Araujo                                                                                                                                                                                                                                                                                 |
| EPI_ISL_1533696                                                                                                                        | Brazil      | Hospital Municipal de Pedreira                                                                                     | Instituto Adolfo Lutz, Interdisciplinary Procedures Center, Strategic Laboratory                                   | Claudio Tavares Sacchi, Claudia Regina Gonçalves, Erica Valessa Ramos Gomes, Karoline Rodrigues Campos, Caio Vinicius Dias Lopes, Leonardo Jose Tadeu de Araujo                                                                                                                                                                                                                                                                                 |
| EPI_ISL_1533699                                                                                                                        | Brazil      | Hospital das Clinicas Luzia de Pinho Melo                                                                          | Instituto Adolfo Lutz, Interdisciplinary Procedures Center, Strategic Laboratory                                   | Claudio Tavares Sacchi, Claudia Regina Gonçalves, Erica Valessa Ramos Gomes, Karoline Rodrigues Campos, Caio Vinicius Dias Lopes, Leonardo Jose Tadeu de Araujo                                                                                                                                                                                                                                                                                 |
| EPI_ISL_1533701                                                                                                                        | Brazil      | Hospital Estadual de Vila Alpina Org Social Seconci Sao Paulo                                                      | Instituto Adolfo Lutz, Interdisciplinary Procedures Center, Strategic Laboratory                                   | Claudio Tavares Sacchi, Claudia Regina Gonçalves, Erica Valessa Ramos Gomes, Karoline Rodrigues Campos, Caio Vinicius Dias Lopes, Leonardo Jose Tadeu de Araujo                                                                                                                                                                                                                                                                                 |
| EPI_ISL_1533702                                                                                                                        | Brazil      | Hospital Universitario da USP Sao Paulo                                                                            | Instituto Adolfo Lutz, Interdisciplinary Procedures Center, Strategic Laboratory                                   | Claudio Tavares Sacchi, Claudia Regina Gonçalves, Erica Valessa Ramos Gomes, Karoline Rodrigues Campos, Caio Vinicius Dias Lopes, Leonardo Jose Tadeu de Araujo                                                                                                                                                                                                                                                                                 |
| EPI_ISL_1533703                                                                                                                        | Brazil      | Pronto Atendimento Sao Jose                                                                                        | Instituto Adolfo Lutz, Interdisciplinary Procedures Center, Strategic Laboratory                                   | Claudio Tavares Sacchi, Claudia Regina Gonçalves, Erica Valessa Ramos Gomes, Karoline Rodrigues Campos, Caio Vinicius Dias Lopes, Leonardo Jose Tadeu de Araujo                                                                                                                                                                                                                                                                                 |
| EPI_ISL_1533704                                                                                                                        | Brazil      | Santa Casa de Atibaia Pro Saude                                                                                    | Instituto Adolfo Lutz, Interdisciplinary Procedures Center, Strategic Laboratory                                   | Claudio Tavares Sacchi, Claudia Regina Gonçalves, Erica Valessa Ramos Gomes, Karoline Rodrigues Campos, Caio Vinicius Dias Lopes, Leonardo Jose Tadeu de Araujo                                                                                                                                                                                                                                                                                 |
| EPI_ISL_1533706                                                                                                                        | Brazil      | PS Mun Santana Lauro Ribas Braga                                                                                   | Instituto Adolfo Lutz, Interdisciplinary Procedures Center, Strategic Laboratory                                   | Claudio Tavares Sacchi, Claudia Regina Gonçalves, Erica Valessa Ramos Gomes, Karoline Rodrigues Campos, Caio Vinicius Dias Lopes, Leonardo Jose Tadeu de Araujo                                                                                                                                                                                                                                                                                 |
| EPI_ISL_1533707                                                                                                                        | Brazil      | Hosp Mun Planalto Waldomiro de Paula                                                                               | Instituto Adolfo Lutz, Interdisciplinary Procedures Center, Strategic Laboratory                                   | Claudio Tavares Sacchi, Claudia Regina Gonçalves, Erica Valessa Ramos Gomes, Karoline Rodrigues Campos, Caio Vinicius Dias Lopes, Leonardo Jose Tadeu de Araujo                                                                                                                                                                                                                                                                                 |
| EPI_ISL_1533709, EPI_ISL_1533710                                                                                                       | Brazil      | Hospital Estadual de Vila Alpina Org Social Seconci Sao Paulo                                                      | Instituto Adolfo Lutz, Interdisciplinary Procedures Center, Strategic Laboratory                                   | Claudio Tavares Sacchi, Claudia Regina Gonçalves, Erica Valessa Ramos Gomes, Karoline Rodrigues Campos, Caio Vinicius Dias Lopes, Leonardo Jose Tadeu de Araujo                                                                                                                                                                                                                                                                                 |
| EPI_ISL_1533711                                                                                                                        | Brazil      | Hospital Santa Clara                                                                                               | Instituto Adolfo Lutz, Interdisciplinary Procedures Center, Strategic Laboratory                                   | Claudio Tavares Sacchi, Claudia Regina Gonçalves, Erica Valessa Ramos Gomes, Karoline Rodrigues Campos, Caio Vinicius Dias Lopes, Leonardo Jose Tadeu de Araujo                                                                                                                                                                                                                                                                                 |
| EPI_ISL_1533712                                                                                                                        | Brazil      | Hospital Universitario da USP Sao Paulo                                                                            | Instituto Adolfo Lutz, Interdisciplinary Procedures Center, Strategic Laboratory                                   | Claudio Tavares Sacchi, Claudia Regina Gonçalves, Erica Valessa Ramos Gomes, Karoline Rodrigues Campos, Caio Vinicius Dias Lopes, Leonardo Jose Tadeu de Araujo                                                                                                                                                                                                                                                                                 |
| EPI_ISL_1533713                                                                                                                        | Brazil      | Unidade de Pronto Atendimento Jd Amanda                                                                            | Instituto Adolfo Lutz, Interdisciplinary Procedures Center, Strategic Laboratory                                   | Claudio Tavares Sacchi, Claudia Regina Gonçalves, Erica Valessa Ramos Gomes, Karoline Rodrigues Campos, Caio Vinicius Dias Lopes, Leonardo Jose Tadeu de Araujo                                                                                                                                                                                                                                                                                 |
| EPI_ISL_1533714                                                                                                                        | Brazil      | Pronto Socorro Dr Osmar Mesquita                                                                                   | Instituto Adolfo Lutz, Interdisciplinary Procedures Center, Strategic Laboratory                                   | Claudio Tavares Sacchi, Claudia Regina Gonçalves, Erica Valessa Ramos Gomes, Karoline Rodrigues Campos, Caio Vinicius Dias Lopes, Leonardo Jose Tadeu de Araujo                                                                                                                                                                                                                                                                                 |
| EPI_ISL_1533715                                                                                                                        | Brazil      | Santa Casa de Aracatuba Hospital Sagrado Coracao de Jesus                                                          | Instituto Adolfo Lutz, Interdisciplinary Procedures Center, Strategic Laboratory                                   | Claudio Tavares Sacchi, Claudia Regina Gonçalves, Erica Valessa Ramos Gomes, Karoline Rodrigues Campos, Caio Vinicius Dias Lopes, Leonardo Jose Tadeu de Araujo                                                                                                                                                                                                                                                                                 |
| EPI_ISL_1533716                                                                                                                        | Brazil      | Vigilancia Em Saude                                                                                                | Instituto Adolfo Lutz, Interdisciplinary Procedures Center, Strategic Laboratory                                   | Claudio Tavares Sacchi, Claudia Regina Gonçalves, Erica Valessa Ramos Gomes, Karoline Rodrigues Campos, Caio Vinicius Dias Lopes, Leonardo Jose Tadeu de Araujo                                                                                                                                                                                                                                                                                 |
| EPI_ISL_1533717                                                                                                                        | Brazil      | Unidade de Pronto Atendimento Jd Amanda                                                                            | Instituto Adolfo Lutz, Interdisciplinary Procedures Center, Strategic Laboratory                                   | Claudio Tavares Sacchi, Claudia Regina Gonçalves, Erica Valessa Ramos Gomes, Karoline Rodrigues Campos, Caio Vinicius Dias Lopes, Leonardo Jose Tadeu de Araujo                                                                                                                                                                                                                                                                                 |
| EPI_ISL_1533718                                                                                                                        | Brazil      | Servico de Verificacao de Obitos Svo Guarulhos                                                                     | Instituto Adolfo Lutz, Interdisciplinary Procedures Center, Strategic Laboratory                                   | Claudio Tavares Sacchi, Claudia Regina Gonçalves, Erica Valessa Ramos Gomes, Karoline Rodrigues Campos, Caio Vinicius Dias Lopes, Leonardo Jose Tadeu de Araujo                                                                                                                                                                                                                                                                                 |
| EPI_ISL_1533719                                                                                                                        | Brazil      | Policlinica Munic da Est Turística de Holambra                                                                     | Instituto Adolfo Lutz, Interdisciplinary Procedures Center, Strategic Laboratory                                   | Claudio Tavares Sacchi, Claudia Regina Gonçalves, Erica Valessa Ramos Gomes, Karoline Rodrigues Campos, Caio Vinicius Dias Lopes, Leonardo Jose Tadeu de Araujo                                                                                                                                                                                                                                                                                 |
| EPI_ISL_1533720                                                                                                                        | Brazil      | Santa Casa de Penapolis                                                                                            | Instituto Adolfo Lutz, Interdisciplinary Procedures Center, Strategic Laboratory                                   | Claudio Tavares Sacchi, Claudia Regina Gonçalves, Erica Valessa Ramos Gomes, Karoline Rodrigues Campos, Caio Vinicius Dias Lopes, Leonardo Jose Tadeu de Araujo                                                                                                                                                                                                                                                                                 |
| EPI_ISL_1533722                                                                                                                        | Brazil      | Secretaria Municipal de Saude De Piracaia                                                                          | Instituto Adolfo Lutz, Interdisciplinary Procedures Center, Strategic Laboratory                                   | Claudio Tavares Sacchi, Claudia Regina Gonçalves, Erica Valessa Ramos Gomes, Karoline Rodrigues Campos, Caio Vinicius Dias Lopes, Leonardo Jose Tadeu de Araujo                                                                                                                                                                                                                                                                                 |
| EPI_ISL_1533723                                                                                                                        | Brazil      | Hospital Geral de Itaquaquecetuba                                                                                  | Instituto Adolfo Lutz, Interdisciplinary Procedures Center, Strategic Laboratory                                   | Claudio Tavares Sacchi, Claudia Regina Gonçalves, Erica Valessa Ramos Gomes, Karoline Rodrigues Campos, Caio Vinicius Dias Lopes, Leonardo Jose Tadeu de Araujo                                                                                                                                                                                                                                                                                 |
| EPI_ISL_1533725                                                                                                                        | Brazil      | Hospital Geral de Guarulhos                                                                                        | Instituto Adolfo Lutz, Interdisciplinary Procedures Center, Strategic Laboratory                                   | Claudio Tavares Sacchi, Claudia Regina Gonçalves, Erica Valessa Ramos Gomes, Karoline Rodrigues Campos, Caio Vinicius Dias Lopes, Leonardo Jose Tadeu de Araujo                                                                                                                                                                                                                                                                                 |
| EPI_ISL_1533726                                                                                                                        | Brazil      | Hospital Estadual de Campanha Covid 19 Barradas                                                                    | Instituto Adolfo Lutz, Interdisciplinary Procedures Center, Strategic Laboratory                                   | Claudio Tavares Sacchi, Claudia Regina Gonçalves, Erica Valessa Ramos Gomes, Karoline Rodrigues Campos, Caio Vinicius Dias Lopes, Leonardo Jose Tadeu de Araujo                                                                                                                                                                                                                                                                                 |
| EPI_ISL_1533727                                                                                                                        | Brazil      | Hospital Universitario da USP Sao Paulo                                                                            | Instituto Adolfo Lutz, Interdisciplinary Procedures Center, Strategic Laboratory                                   | Claudio Tavares Sacchi, Claudia Regina Gonçalves, Erica Valessa Ramos Gomes, Karoline Rodrigues Campos, Caio Vinicius Dias Lopes, Leonardo Jose Tadeu de Araujo                                                                                                                                                                                                                                                                                 |
| EPI_ISL_1533992, EPI_ISL_1533993, EPI_ISL_1533994, EPI_ISL_1533996                                                                     | Brazil      | Laboratorio Central de Saude Publica do Estado de Santa Catarina (LACEN-SC)                                        | Laboratory of Respiratory Viruses and Measles, Oswaldo Cruz Institute, FIOCRUZ                                     | Paola Resende, Luciana Appolinario, Fernando Motta, Anna Carolina Paixao, Ana Carolina Mendonca, Alice Sampaio Rocha, Renata Serrano Lopes, Darcita Buerger Rovaris, Sandra Bianchini Fernandes, Marilda Siqueira on behalf of the Fiocruz COVID-19 Genomic Surveillance Network                                                                                                                                                                |
| EPI_ISL_1533999, EPI_ISL_1534000, EPI_ISL_1534001                                                                                      | Brazil      | Laboratorio Central de Saude Publica do Estado do Parana (LACEN-PR)                                                | Laboratory of Respiratory Viruses and Measles, Oswaldo Cruz Institute, FIOCRUZ                                     | Paola Resende, Luciana Appolinario, Fernando Motta, Anna Carolina Paixao, Ana Carolina Mendonca, Alice Sampaio Rocha, Renata Serrano Lopes, Maria do Carmo Debur, Irina Nastassja Riediger, Marilda Siqueira on behalf of the Fiocruz COVID-19 Genomic Surveillance Network                                                                                                                                                                     |
| EPI_ISL_1534002, EPI_ISL_1534003                                                                                                       | Brazil      | Laboratorio Central de Saude Publica do Estado de Santa Catarina (LACEN-SC)                                        | Laboratory of Respiratory Viruses and Measles, Oswaldo Cruz Institute, FIOCRUZ                                     | Paola Resende, Luciana Appolinario, Fernando Motta, Anna Carolina Paixao, Ana Carolina Mendonca, Alice Sampaio Rocha, Renata Serrano Lopes, Darcita Buerger Rovaris, Sandra Bianchini Fernandes, Marilda Siqueira on behalf of the Fiocruz COVID-19 Genomic Surveillance Network                                                                                                                                                                |
| EPI_ISL_1534004                                                                                                                        | Brazil      | Laboratorio Central de Saude Publica do Estado de Sergipe                                                          | Laboratory of Respiratory Viruses and Measles, Oswaldo Cruz                                                        | Paola Resende, Luciana Appolinario, Fernando Motta, Anna Carolina Paixao, Ana Carolina Mendonca, Alice Sampaio Rocha, Renata Serrano Lopes,                                                                                                                                                                                                                                                                                                     |

|                                                                                                                                                                                                                                                                                                                                                                                                                                                          |                                                                                                    |                                                                                                                                     |                                                                                                                                                                                                                                                                                                                                                                                                                                                                                                                                                                                                                 |
|----------------------------------------------------------------------------------------------------------------------------------------------------------------------------------------------------------------------------------------------------------------------------------------------------------------------------------------------------------------------------------------------------------------------------------------------------------|----------------------------------------------------------------------------------------------------|-------------------------------------------------------------------------------------------------------------------------------------|-----------------------------------------------------------------------------------------------------------------------------------------------------------------------------------------------------------------------------------------------------------------------------------------------------------------------------------------------------------------------------------------------------------------------------------------------------------------------------------------------------------------------------------------------------------------------------------------------------------------|
|                                                                                                                                                                                                                                                                                                                                                                                                                                                          | (LACEN-SE)                                                                                         | Institute, FIOCRUZ                                                                                                                  | Cliomar Alves dos Santos, Marilda Siqueira on behalf of the Fiocruz COVID-19 Genomic Surveillance Network                                                                                                                                                                                                                                                                                                                                                                                                                                                                                                       |
| EPI_ISL_1534007, EPI_ISL_1534008, EPI_ISL_1534009, EPI_ISL_1534010                                                                                                                                                                                                                                                                                                                                                                                       | Laboratório Central de Saúde Pública do Estado de Santa Catarina (LACEN-SC)                        | Laboratory of Respiratory Viruses and Measles, Oswaldo Cruz Institute, FIOCRUZ                                                      | Paola Resende, Luciana Appolinario, Fernando Motta, Anna Carolina Paixao, Ana Carolina Mendonca, Alice Sampaio Rocha, Renata Serrano Lopes, Darcita Buerger Rovaris, Sandra Bianchini Fernandes, Marilda Siqueira on behalf of the Fiocruz COVID-19 Genomic Surveillance Network                                                                                                                                                                                                                                                                                                                                |
| EPI_ISL_1534011                                                                                                                                                                                                                                                                                                                                                                                                                                          | Laboratory of Respiratory Viruses and Measles, Oswaldo Cruz Institute, FIOCRUZ                     | Laboratory of Respiratory Viruses and Measles, Oswaldo Cruz Institute, FIOCRUZ                                                      | Paola Resende, Luciana Appolinario, Fernando Motta, Anna Carolina Paixao, Ana Carolina Mendonca, Alice Sampaio Rocha, Renata Serrano Lopes, Marilda Siqueira on behalf of the Fiocruz COVID-19 Genomic Surveillance Network                                                                                                                                                                                                                                                                                                                                                                                     |
| EPI_ISL_1534012                                                                                                                                                                                                                                                                                                                                                                                                                                          | Laboratório Central de Saúde Pública do Estado do Rio de Janeiro (LACEN-RJ)                        | Laboratory of Respiratory Viruses and Measles, Oswaldo Cruz Institute, FIOCRUZ                                                      | Paola Resende, Luciana Appolinario, Fernando Motta, Anna Carolina Paixao, Ana Carolina Mendonca, Alice Sampaio Rocha, Renata Serrano Lopes, Andrea Cony Cavalcanti, Marilda Siqueira on behalf of the Fiocruz COVID-19 Genomic Surveillance Network                                                                                                                                                                                                                                                                                                                                                             |
| EPI_ISL_1534013                                                                                                                                                                                                                                                                                                                                                                                                                                          | Laboratório Central de Saúde Pública do Estado do Rio Grande do Sul (LACEN-RS)                     | Laboratory of Respiratory Viruses and Measles, Oswaldo Cruz Institute, FIOCRUZ                                                      | Paola Resende, Luciana Appolinario, Fernando Motta, Anna Carolina Paixao, Ana Carolina Mendonca, Alice Sampaio Rocha, Renata Serrano Lopes, Richard Salvato, Tatiana Schaffer Gregianini, Marilda Siqueira on behalf of the Fiocruz COVID-19 Genomic Surveillance Network                                                                                                                                                                                                                                                                                                                                       |
| EPI_ISL_1534014, EPI_ISL_1534015, EPI_ISL_1534016                                                                                                                                                                                                                                                                                                                                                                                                        | Laboratory of Respiratory Viruses and Measles, Oswaldo Cruz Institute, FIOCRUZ                     | Laboratory of Respiratory Viruses and Measles, Oswaldo Cruz Institute, FIOCRUZ                                                      | Paola Resende, Luciana Appolinario, Fernando Motta, Anna Carolina Paixao, Ana Carolina Mendonca, Alice Sampaio Rocha, Renata Serrano Lopes, Marilda Siqueira on behalf of the Fiocruz COVID-19 Genomic Surveillance Network                                                                                                                                                                                                                                                                                                                                                                                     |
| EPI_ISL_1534544, EPI_ISL_1534546, EPI_ISL_1534547, EPI_ISL_1534555, EPI_ISL_1534556, EPI_ISL_1534563, EPI_ISL_1534567, EPI_ISL_1534570, EPI_ISL_1534572, EPI_ISL_1534575, EPI_ISL_1534578, EPI_ISL_1534581, EPI_ISL_1534589, EPI_ISL_1534590, EPI_ISL_1534593, EPI_ISL_1534596, EPI_ISL_1534601, EPI_ISL_1534602, EPI_ISL_1534603, EPI_ISL_1534604, EPI_ISL_1534605, EPI_ISL_1534606, EPI_ISL_1540997, EPI_ISL_1541006, EPI_ISL_1541007, EPI_ISL_1541015 |                                                                                                    |                                                                                                                                     |                                                                                                                                                                                                                                                                                                                                                                                                                                                                                                                                                                                                                 |
| see above                                                                                                                                                                                                                                                                                                                                                                                                                                                | Genética Molecular and Subdepartamento de Virologia ISP Chile                                      | Instituto de Salud Pública de Chile                                                                                                 | Javier Tognarelli, Karen Orostica, Barbara Parra, Loredana Arata, Jaime Lagos, Gisselle Barra, Patricia Bustos, Rodrigo Fasce, Andres Castillo, Jorge Fernandez                                                                                                                                                                                                                                                                                                                                                                                                                                                 |
| EPI_ISL_1578453                                                                                                                                                                                                                                                                                                                                                                                                                                          | Laboratório de Biologia Molecular do Hospital das Clínicas da Faculdade de Medicina de Botucatu/SP | Laboratórios Genômica Funcional (FCA/UNESP) e Biologia Molecular (FMB-HC/UNESP) - Rede de Vigilância Genômica (Vigenômica)/UNESP    | Patricia Akemi Assato; Felipe Allan da Silva da Costa; Bianca Cechetto Carlos; Flavia Hebner Barbosa Trovão; Guilherme Targino Valente; Rejane Maria Tommasini Grotto; Jayme A. Souza-Neto.                                                                                                                                                                                                                                                                                                                                                                                                                     |
| EPI_ISL_1578740, EPI_ISL_1579258                                                                                                                                                                                                                                                                                                                                                                                                                         | Laboratório de Biologia Molecular do Hospital das Clínicas da Faculdade de Medicina de Botucatu/SP | Laboratórios de Genômica Funcional (FCA/UNESP) e Biologia Molecular (FMB-HC/UNESP) - Rede de Vigilância Genômica (Vigenômica)/UNESP | Patricia Akemi Assato; Felipe Allan da Silva da Costa; Bianca Cechetto Carlos; Flavia Hebner Barbosa Trovão; Guilherme Targino Valente; Rejane Maria Tommasini Grotto; Jayme A. Souza-Neto.                                                                                                                                                                                                                                                                                                                                                                                                                     |
| EPI_ISL_1583650, EPI_ISL_1583656, EPI_ISL_1583663, EPI_ISL_1583665, EPI_ISL_1583672, EPI_ISL_1583673, EPI_ISL_1583674                                                                                                                                                                                                                                                                                                                                    | Central Public Health Laboratory - LACEN -Bahia, Salvador, Brazil                                  | Central Public Health Laboratory - LACEN -Bahia, Salvador, Brazil                                                                   | Stephane Tosta, Luciana Oliveira, Vanessa Nardy, Patricia Cajado, Marcela Gómez, Breno Dominguez, Jaqueline Gomes, Vagner Fonseca, Marta Giovanetti, Luiz Alcantara, Felicidade Pereira, Arabela Leal                                                                                                                                                                                                                                                                                                                                                                                                           |
| EPI_ISL_1583675                                                                                                                                                                                                                                                                                                                                                                                                                                          | DNA Laboratory                                                                                     | Central Public Health Laboratory - LACEN -Bahia, Salvador, Brazil                                                                   | Stephane Tosta, Luciana Oliveira, Vanessa Nardy, Patricia Cajado, Marcela Gómez, Breno Dominguez, Jaqueline Gomes, Vagner Fonseca, Marta Giovanetti, Luiz Alcantara, Felicidade Pereira, Arabela Leal                                                                                                                                                                                                                                                                                                                                                                                                           |
| EPI_ISL_1583676, EPI_ISL_1583677, EPI_ISL_1583679, EPI_ISL_1583680, EPI_ISL_1583681, EPI_ISL_1583682, EPI_ISL_1583683, EPI_ISL_1583694, EPI_ISL_1583697, EPI_ISL_1583700, EPI_ISL_1583719, EPI_ISL_1583722, EPI_ISL_1583725, EPI_ISL_1583730, EPI_ISL_1583733                                                                                                                                                                                            | see above                                                                                          | Central Public Health Laboratory - LACEN -Bahia, Salvador, Brazil                                                                   | Stephane Tosta, Luciana Oliveira, Vanessa Nardy, Patricia Cajado, Marcela Gómez, Breno Dominguez, Jaqueline Gomes, Vagner Fonseca, Marta Giovanetti, Luiz Alcantara, Felicidade Pereira, Arabela Leal                                                                                                                                                                                                                                                                                                                                                                                                           |
| EPI_ISL_1591098                                                                                                                                                                                                                                                                                                                                                                                                                                          | NAMRU-6                                                                                            | Pathogen Discovery, Respiratory Viruses Branch, Division of Viral Diseases, Centers for Disease Control and Prevention              | Yan Li, Ying Tao, Anna Kelleher, Jing Zhang, Anna Montmayeur, Brian Lynch, Krista Queen, Anna Uehara, Peter Cook, Han Jia Justin Ng, Rachel Marine, Clinton R. Paden, Haibin Wang, Mark Burroughs, Justin Lee, Adam Retchless, Suxiang Tong                                                                                                                                                                                                                                                                                                                                                                     |
| EPI_ISL_1592230                                                                                                                                                                                                                                                                                                                                                                                                                                          | Laboratório Hermes Pardini                                                                         | Laboratório de Biologia Integrativa, Instituto de Ciências Biológicas, Universidade Federal de Minas Gerais                         | Filipe Romero Rebelo Moreira, Diego Menezes Bonfim, Danielle Alves Gomes Zauli, Joice do Prado Silva, Aline Brito de Lima, Frederico Scott Varella Malta, Alessandro Clayton de Souza Ferreira, Victor Cavalcanti Pardini, Daniel Costa Queiroz, Rafael Marques de Souza, Victor Emmanuel Viana Geddes, Walyson Coelho Costa, Wagner Carlos Santos Magalhães, Rennan Garcias Moreira, Carolina Moreira Voloch, Renan Pedro de Souza, Renato Santana Aguiar.                                                                                                                                                     |
| EPI_ISL_1593463, EPI_ISL_1593464                                                                                                                                                                                                                                                                                                                                                                                                                         | CHC Andrée Rosemon                                                                                 | Institut Pasteur de la Guyane                                                                                                       | Anne Lavergne, Dominique Rousset                                                                                                                                                                                                                                                                                                                                                                                                                                                                                                                                                                                |
| EPI_ISL_1593466                                                                                                                                                                                                                                                                                                                                                                                                                                          | CH de l'Ouest Guyanais                                                                             | Institut Pasteur de la Guyane                                                                                                       | Anne Lavergne, Dominique Rousset                                                                                                                                                                                                                                                                                                                                                                                                                                                                                                                                                                                |
| EPI_ISL_1593470, EPI_ISL_1593471                                                                                                                                                                                                                                                                                                                                                                                                                         | CNR Institut Pasteur de la Guyane                                                                  | Institut Pasteur de la Guyane                                                                                                       | Anne Lavergne, Dominique Rousset                                                                                                                                                                                                                                                                                                                                                                                                                                                                                                                                                                                |
| EPI_ISL_1593980                                                                                                                                                                                                                                                                                                                                                                                                                                          | CHC Andrée Rosemon                                                                                 | Institut Pasteur de la Guyane                                                                                                       | Anne Lavergne, Dominique Rousset                                                                                                                                                                                                                                                                                                                                                                                                                                                                                                                                                                                |
| EPI_ISL_1593984                                                                                                                                                                                                                                                                                                                                                                                                                                          | Labo Carage                                                                                        | Institut Pasteur de la Guyane                                                                                                       | Anne Lavergne, Dominique Rousset                                                                                                                                                                                                                                                                                                                                                                                                                                                                                                                                                                                |
| EPI_ISL_1608161, EPI_ISL_1608162, EPI_ISL_1608163, EPI_ISL_1608164, EPI_ISL_1608165, EPI_ISL_1608166, EPI_ISL_1608167, EPI_ISL_1608168, EPI_ISL_1608169, EPI_ISL_1608170, EPI_ISL_1608171                                                                                                                                                                                                                                                                | see above                                                                                          | Hospital São Rafael - IDOR                                                                                                          | Carolina Kymie Vasques Nonaka, Tiago Gráf, Camila Araújo de Lorenzo Barcia, Vanessa Ferreira Costa, Janderson Lopes de Oliveira, Rogério da Hora Passos, Clarissa Araújo Gurgel Rocha, Iasmin Nogueira Bastos, Maria Clara Brito de Santana, Ian Marinho Santos, Karoline Almeida Felix de Sousa, Isadora Cristina de Siqueira, Thamires Gomes Lopes Weber, Ana Verena Almeida Mendes, Bruno Solano de Freitas Souza                                                                                                                                                                                            |
| EPI_ISL_1620638                                                                                                                                                                                                                                                                                                                                                                                                                                          | Hospital Municipal Dr. Ignacio Proença de Gouvea                                                   | Instituto Butantan / Mendelics                                                                                                      | Alexander Roberto Precioso, Dimas Tadeu Covas, Sandra Coccuzzo Sampaio, Maria Carolina Elias, José Salvatore Leister Patané, Vincent Louis Viala, Antonio Jorge Martins, Ricardo Haddad, Claudia Renata dos Santos Barros, Elaine Cristina Marqueze, Raul Machado Neto, Debora Botequilo Moretti, Bibiana Santos, João Paulo Kitajima, Erika Freitas, David Schlesinger, Simone Kashima, Evandra Strazza Rodrigues, Svetoslav Nanev Slavov, Elaine Vieira dos Santos, Rafael dos Santos Bezerra, Luiz Carlos Junior de Alcantara, Marta Giovanetti, Vagner Fonseca, Flavia Aburjaile, Rodrigo Tocantins Calado. |
| EPI_ISL_1620639                                                                                                                                                                                                                                                                                                                                                                                                                                          | Fleury                                                                                             | Instituto Butantan / Mendelics                                                                                                      | Alexander Roberto Precioso, Dimas Tadeu Covas, Sandra Coccuzzo Sampaio, Maria Carolina Elias, José Salvatore Leister Patané, Vincent Louis Viala, Antonio Jorge Martins, Ricardo Haddad, Claudia Renata dos Santos Barros, Elaine Cristina Marqueze, Raul Machado Neto, Debora Botequilo Moretti, Bibiana Santos, João Paulo Kitajima, Erika Freitas, David Schlesinger, Simone Kashima, Evandra Strazza Rodrigues, Svetoslav Nanev Slavov, Elaine Vieira dos Santos, Rafael dos Santos Bezerra, Luiz Carlos Junior de Alcantara, Marta Giovanetti, Vagner Fonseca, Flavia Aburjaile, Rodrigo Tocantins Calado. |
| EPI_ISL_1625972                                                                                                                                                                                                                                                                                                                                                                                                                                          | Ama J Angela                                                                                       | Instituto Adolfo Lutz, Interdisciplinary Procedures Center, Strategic Laboratory                                                    | Claudio Tavares Sacchi, Claudia Regina Gonçalves, Erica Valessa Ramos Gomes, Karoline Rodrigues Campos, Caio Vinicius Dias Lopes, Leonardo Jose Tadeu de Araujo, Katia Correa de Oliveira Santos                                                                                                                                                                                                                                                                                                                                                                                                                |
| EPI_ISL_1625974                                                                                                                                                                                                                                                                                                                                                                                                                                          | Santa Casa de Aracatuba Hospital Sagrado Coracao de Jesus                                          | Instituto Adolfo Lutz, Interdisciplinary Procedures Center, Strategic Laboratory                                                    | Claudio Tavares Sacchi, Claudia Regina Gonçalves, Erica Valessa Ramos Gomes, Karoline Rodrigues Campos, Caio Vinicius Dias Lopes, Leonardo Jose Tadeu de Araujo, Katia Correa de Oliveira Santos                                                                                                                                                                                                                                                                                                                                                                                                                |
| EPI_ISL_1625975                                                                                                                                                                                                                                                                                                                                                                                                                                          | CS II Dr Antonio Vicoso Moreira De Rezende Sumare                                                  | Instituto Adolfo Lutz, Interdisciplinary Procedures Center, Strategic Laboratory                                                    | Claudio Tavares Sacchi, Claudia Regina Gonçalves, Erica Valessa Ramos Gomes, Karoline Rodrigues Campos, Caio Vinicius Dias Lopes, Leonardo Jose Tadeu de Araujo, Katia Correa de Oliveira Santos                                                                                                                                                                                                                                                                                                                                                                                                                |
| EPI_ISL_1625976                                                                                                                                                                                                                                                                                                                                                                                                                                          | Centro de Saúde III de Divinolândia                                                                | Instituto Adolfo Lutz, Interdisciplinary Procedures Center, Strategic Laboratory                                                    | Claudio Tavares Sacchi, Claudia Regina Gonçalves, Erica Valessa Ramos Gomes, Karoline Rodrigues Campos, Caio Vinicius Dias Lopes, Leonardo Jose Tadeu de Araujo, Katia Correa de Oliveira Santos                                                                                                                                                                                                                                                                                                                                                                                                                |
| EPI_ISL_1625978, EPI_ISL_1625984, EPI_ISL_1625986, EPI_ISL_1625987, EPI_ISL_1625988, EPI_ISL_1625989, EPI_ISL_1625990, EPI_ISL_1625991, EPI_ISL_1625992, EPI_ISL_1625993, EPI_ISL_1625994, EPI_ISL_1625995, EPI_ISL_1625997, EPI_ISL_1625998, EPI_ISL_1625999, EPI_ISL_1626001, EPI_ISL_1626002, EPI_ISL_1626003, EPI_ISL_1626004, EPI_ISL_1626006, EPI_ISL_1626006                                                                                      | see above                                                                                          | Instituto Adolfo Lutz - Regional de Rio Claro                                                                                       | Claudio Tavares Sacchi, Claudia Regina Gonçalves, Erica Valessa Ramos Gomes, Karoline Rodrigues Campos, Caio Vinicius Dias Lopes, Leonardo Jose Tadeu de Araujo, Katia Correa de Oliveira Santos                                                                                                                                                                                                                                                                                                                                                                                                                |
| EPI_ISL_1626613, EPI_ISL_1626615, EPI_ISL_1626616                                                                                                                                                                                                                                                                                                                                                                                                        | Gencore - Universidad de los Andes                                                                 | Gencore - Universidad de los Andes                                                                                                  | Luisa Sacristan, David Gonzalez, Cristian Barrera, Gabriela Ariza, Silvia Restrepo, Erica Salguero, Marcela Guevara, Ana Maria Palacio                                                                                                                                                                                                                                                                                                                                                                                                                                                                          |
| EPI_ISL_1626618                                                                                                                                                                                                                                                                                                                                                                                                                                          | Laboratorio de Salud Pública Bogota                                                                | Gencore - Universidad de los Andes                                                                                                  | Luisa Sacristan, David Gonzalez, Silvia Restrepo, Marcela Guevara, Ana Maria Palacio, Johana Hernandez, Gabriela Delgado, Alejandro Gomez                                                                                                                                                                                                                                                                                                                                                                                                                                                                       |
| EPI_ISL_1628344                                                                                                                                                                                                                                                                                                                                                                                                                                          | Hospital Geral de Pedreira                                                                         | Instituto Adolfo Lutz, Interdisciplinary Procedures Center,                                                                         | Claudio Tavares Sacchi, Claudia Regina Gonçalves, Erica Valessa Ramos Gomes, Karoline Rodrigues Campos, Caio Vinicius Dias Lopes, Leonardo Jose                                                                                                                                                                                                                                                                                                                                                                                                                                                                 |





|                                                                                                                                                                                                                                                |                                                                                            |                                                                                                               |                                                                                                                                                                                                                                                                                                                                            |
|------------------------------------------------------------------------------------------------------------------------------------------------------------------------------------------------------------------------------------------------|--------------------------------------------------------------------------------------------|---------------------------------------------------------------------------------------------------------------|--------------------------------------------------------------------------------------------------------------------------------------------------------------------------------------------------------------------------------------------------------------------------------------------------------------------------------------------|
| EPI_ISL_918499, EPI_ISL_918500, EPI_ISL_918501, EPI_ISL_918502, EPI_ISL_918503, EPI_ISL_918504, EPI_ISL_918505, EPI_ISL_918506, EPI_ISL_918507, EPI_ISL_918508, EPI_ISL_918509, EPI_ISL_918510, EPI_ISL_918511                                 |                                                                                            |                                                                                                               |                                                                                                                                                                                                                                                                                                                                            |
| see above                                                                                                                                                                                                                                      | LACEN - Laboratório Central de Saúde Pública do Amazonas                                   | Evandro Chagas Institute                                                                                      | Santos, M.C.; Silva, A.M.; Junior, W.D.C.; Barbagelata, L.S.; Ferreira, J.A.; Sousa, E.M.A.; da Silva, P.S.; Pinheiro, K.C.; L.C.; Sousa Junior, E.C.                                                                                                                                                                                      |
| EPI_ISL_940614, EPI_ISL_940615, EPI_ISL_940616, EPI_ISL_940617, EPI_ISL_940618                                                                                                                                                                 | LACEN-PI DR. Costa Alvarenga                                                               | Instituto Adolfo Lutz, Interdisciplinary Procedures Center, Strategic Laboratory                              | Claudio Tavares Sacchi, Claudia Regina Gonçalves, Erica Valessa Ramos Gomes, Karoline Rodrigues Campos                                                                                                                                                                                                                                     |
| EPI_ISL_940619, EPI_ISL_940620, EPI_ISL_940621, EPI_ISL_940622, EPI_ISL_940623, EPI_ISL_940624, EPI_ISL_940625                                                                                                                                 | Hospital Sao Joaquim - Beneficiencia Portuguesa                                            | Instituto Adolfo Lutz, Interdisciplinary Procedures Center, Strategic Laboratory                              | Claudio Tavares Sacchi, Claudia Regina Gonçalves, Erica Valessa Ramos Gomes, Karoline Rodrigues Campos                                                                                                                                                                                                                                     |
| EPI_ISL_940626, EPI_ISL_940627                                                                                                                                                                                                                 | Hospital Central Sao Caetano do Sul                                                        | Instituto Adolfo Lutz, Interdisciplinary Procedures Center, Strategic Laboratory                              | Claudio Tavares Sacchi, Claudia Regina Gonçalves, Erica Valessa Ramos Gomes, Karoline Rodrigues Campos                                                                                                                                                                                                                                     |
| EPI_ISL_940630                                                                                                                                                                                                                                 | Hospital Geral de Sao Paulo                                                                | Instituto Adolfo Lutz, Interdisciplinary Procedures Center, Strategic Laboratory                              | Claudio Tavares Sacchi, Claudia Regina Gonçalves, Erica Valessa Ramos Gomes, Karoline Rodrigues Campos                                                                                                                                                                                                                                     |
| EPI_ISL_943570                                                                                                                                                                                                                                 | Laboratorio de Referencia Nacional de Virus Respiratorio. Instituto Nacional de Salud Perú | Laboratorio de Referencia Nacional de Biotecnología y Biología Molecular. Instituto Nacional de Salud Perú    | Carlos Padilla Rojas, Karolyn Vega Chozo, Luis Barcena, Priscila Lope Parí, Omar Caceres Rey, Marco Galarza Perez, Maribel Huaranga Nuñez, Johanna Balbuena Torrez, Henri Bailon Calderon, Nancy Rojas Serrano                                                                                                                             |
| EPI_ISL_943967, EPI_ISL_943968, EPI_ISL_943969, EPI_ISL_943970, EPI_ISL_943971                                                                                                                                                                 | Hospital Geral de Sao Paulo                                                                | Instituto Adolfo Lutz, Interdisciplinary Procedures Center, Strategic Laboratory                              | Claudio Tavares Sacchi, Claudia Regina Gonçalves, Erica Valessa Ramos Gomes, Karoline Rodrigues Campos                                                                                                                                                                                                                                     |
| EPI_ISL_943987                                                                                                                                                                                                                                 | LACEN do Estado de Tocantins                                                               | Instituto Adolfo Lutz, Interdisciplinary Procedures Center, Strategic Laboratory                              | Claudio Tavares Sacchi, Claudia Regina Gonçalves, Erica Valessa Ramos Gomes, Karoline Rodrigues Campos                                                                                                                                                                                                                                     |
| EPI_ISL_943990                                                                                                                                                                                                                                 | LACEN do Estado de Goias                                                                   | Instituto Adolfo Lutz, Interdisciplinary Procedures Center, Strategic Laboratory                              | Claudio Tavares Sacchi, Claudia Regina Gonçalves, Erica Valessa Ramos Gomes, Karoline Rodrigues Campos                                                                                                                                                                                                                                     |
| EPI_ISL_956287, EPI_ISL_956289, EPI_ISL_956297                                                                                                                                                                                                 | Instituto Nacional de Salud- Dirección de Redes de Laboratorios de Salud Pública           | Instituto Nacional de Salud- Dirección de Investigación en Salud Pública                                      | Katherine Laiton-Donato, Diego A. Álvarez-Díaz, Carlos Franco-Muñoz, Mauricio Pacheco-Montealegre, Hector Alejandro Ruiz-Moreno, Maria T. Herrera-Sepúlveda, Diego Andrés Prada, Jhonnatan Reales-González, Sheryll Corchuelo, Julian Naizaque, Gerardo Santamaría, Magdalena Wiesner, Martha Lucia Ospina Martinez, Marcela Mercado-Reyes |
| EPI_ISL_981383, EPI_ISL_981385, EPI_ISL_981387                                                                                                                                                                                                 | IAL Regional de Bauru                                                                      | Instituto Adolfo Lutz, Interdisciplinary Procedures Center, Strategic Laboratory                              | Claudio Tavares Sacchi, Claudia Regina Gonçalves, Erica Valessa Ramos Gomes, Karoline Rodrigues Campos                                                                                                                                                                                                                                     |
| EPI_ISL_983865, EPI_ISL_984619, EPI_ISL_984620, EPI_ISL_984621                                                                                                                                                                                 | Central Laboratory of Public Health of Rio Grande do Sul (Lacen-RS)                        | State Center for Health Surveillance of the Health Department of the State of Rio Grande do Sul (CEVS/SES-RS) | Aline Campos, Cynthia Molina, Lara Crescente, Leticia Garay, Ludmila Fiorenzano Baethgen, Richard Salvato, Tatiana Gregianini                                                                                                                                                                                                              |
| EPI_ISL_985303, EPI_ISL_985304, EPI_ISL_985305, EPI_ISL_985306, EPI_ISL_985307, EPI_ISL_985308, EPI_ISL_985309, EPI_ISL_985310, EPI_ISL_985311, EPI_ISL_985312, EPI_ISL_985313, EPI_ISL_985314, EPI_ISL_985315, EPI_ISL_985316, EPI_ISL_985317 | see above                                                                                  | LACEN do Estado de Goias                                                                                      | Instituto Adolfo Lutz, Interdisciplinary Procedures Center, Strategic Laboratory                                                                                                                                                                                                                                                           |
| EPI_ISL_985318, EPI_ISL_985319                                                                                                                                                                                                                 | LACEN de Santa Catarina                                                                    | Instituto Adolfo Lutz, Interdisciplinary Procedures Center, Strategic Laboratory                              | Claudio Tavares Sacchi, Claudia Regina Gonçalves, Erica Valessa Ramos Gomes, Karoline Rodrigues Campos                                                                                                                                                                                                                                     |
